# Supplementary material for: Rh(iii)-Catalyzed cascade annulation to produce an N-acetyl chain of spiropyrroloisoquinoline derivatives
Source: Royal Society of Chemistry journal article supplement (doi:10.1039/d2ob00137c), 2022-01-01

## Supporting Information

# Rh(III)-Catalyzed Cascade Annulation to Produce N-acetyl Chain of Spiropyrroloisoquinoline Derivatives

Yuan He, Jing Zheng and Lin Dong\*

*Key Laboratory of Drug-Targeting and Drug Delivery System of the Education Ministry and Sichuan Province, Sichuan Engineering Laboratory for Plant-Sourced Drug and Sichuan Research Center for Drug Precision Industrial Technology, West China School of Pharmacy, Sichuan University, Chengdu 610041, China*

*dongl@scu.edu.cn*

### Table of Contents

|                                                                                                                |           |
|----------------------------------------------------------------------------------------------------------------|-----------|
| <b>1. General Information.....</b>                                                                             | <b>2</b>  |
| <b>2. Material.....</b>                                                                                        | <b>2</b>  |
| <b>3. General Procedure A for the Synthesis of Products 4 and 5.....</b>                                       | <b>2</b>  |
| <b>4. General Procedure B for the Synthesis of Product 5.....</b>                                              | <b>3</b>  |
| <b>5. Optimization of the Reaction Conditions .....</b>                                                        | <b>3</b>  |
| <b>6. Mechanism Study.....</b>                                                                                 | <b>6</b>  |
| <b>7. References .....</b>                                                                                     | <b>14</b> |
| <b>8. Characterization Data and NMR Spectra of N-acetyl Chain of Spiropyrroloisoquinoline Derivatives.....</b> | <b>14</b> |
| <b>9. <sup>1</sup>H, <sup>13</sup>C and <sup>19</sup>F NMR spectra .....</b>                                   | <b>28</b> |

## 1. General Information

All reactions were carried out in high-pressure reaction tube. Column chromatography was performed with silica gel (200–300 mesh). High-resolution mass spectra (HRMS) were obtained with a Waters-Q-TOF-Premier (ESI).  $^1\text{H}$  NMR and  $^{13}\text{C}$  NMR spectra were recorded on a Bruker 400 MHz and 100MHz instrument. Spectra were reported relative to  $\text{Me}_4\text{Si}$  ( $\delta$  0.0 ppm),  $\text{CDCl}_3$  ( $\delta$  7.26 ppm).  $^{13}\text{C}$  NMR were reported relative to  $\text{CDCl}_3$  ( $\delta$  77.16 ppm). Splitting patterns are designated as follows: s, singlet; d, doublet; t, triplet; q, quartet; m, multiplet. Compounds were characterized by  $^1\text{H}$  NMR,  $^{13}\text{C}$  NMR,  $^{19}\text{F}$  NMR and HRMS.

## 2. Material

Unless otherwise noted, all reagents were obtained from commercial suppliers and used without further purification. Solvents were dried over sodium (for THF and ether) and  $\text{CaH}_2$  (for toluene, DCM and DCE) by refluxing for overnight and freshly distilled prior to use. Alkynes was prepared following literature procedures<sup>[1]</sup>. Maleimides was prepared following literature procedures<sup>[2]</sup>.

### General Procedure for the Synthesis of 3-Aryloxadiazole<sup>[3]</sup>

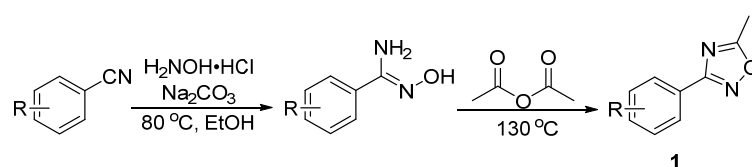

A solution with benzonitrile (1.0 equiv, 5.0 mmol), sodium carbonate (2.0 equiv), hydroxylamine hydrochloride (2.0 equiv), and EtOH (7.5 mL) was heated to reflux overnight. After cooling to room temperature, the mixture was filtered over a pad of celite and evaporated to dryness to give crude product benzamidoxime. Then the acetic anhydride (1.1 equiv) was added and the mixture was heated at 130 °C for 1 h. After cooling to room temperature, the mixture solution was extracted with EtOAc (3 × 20 mL), the combined organic layer was washed with saturated brine, then the combined organic layers were dried ( $\text{MgSO}_4$ ), filtered, and concentrated in vacuo. Purification of the residue by column chromatography (petroleum ether/ethyl acetate = 30/1) to give the product **1**.

### 3. General Procedure A for the Synthesis of Products 4 and 5 (Condition A: spiropyrroloisoquinoline 4 as the major product)

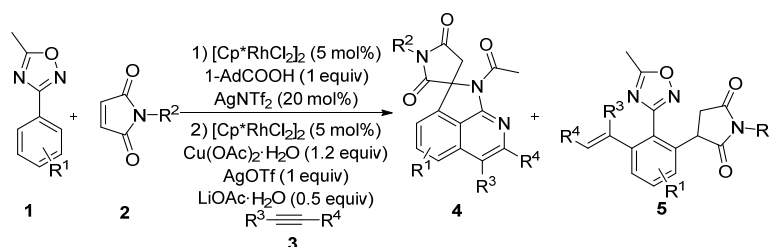

A mixture of **1** (0.05 mmol), **2** (1.2 equiv),  $[\text{Cp}^*\text{RhCl}_2]_2$  (5 mol%),  $\text{AgNTf}_2$  (20 mol%), 1-AdCOOH (1.0 equiv), DCE (0.5 mL) were added to an oven dried high-pressure tube under Ar atmosphere. The reaction mixture was stirred at 100 °C for 5-16 h. Subsequently, **3** (1.2 equiv),

[Cp\*RhCl<sub>2</sub>]<sub>2</sub> (5 mol%), Cu(OAc)<sub>2</sub>•H<sub>2</sub>O (1.2 equiv), AgOTf (1.0 equiv), LiOAc•2H<sub>2</sub>O (0.5 equiv) were directly to the mixture, the reaction mixture was stirred at 100 °C for 13 h under Ar. After cooling to room temperature, Na<sub>2</sub>CO<sub>3</sub> (2.0 equiv) was added to the tube and stirred until acid disappear (monitored by TLC). Then the mixture was filtered over a pad of celite and the filtered was concentrated in vacuo. Purification of the residue by column chromatography (petroleum ether/ dichloromethane/ethyl acetate = 6/3/1) to give the product **4** and **5**.

#### 4. General Procedure B for the Synthesis of Product 5 (Condition B: 5 as the single product)

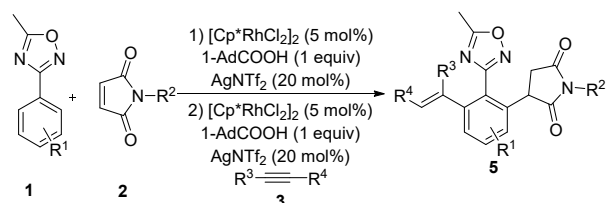

A mixture of **1** (0.05 mmol), **2** (1.2 equiv), [Cp\*RhCl<sub>2</sub>]<sub>2</sub> (5 mol%), AgNTf<sub>2</sub> (20 mol%), 1-AdCOOH (1.0 equiv), DCE (0.5 mL) were added to an oven dried high-pressure tube under Ar atmosphere. The reaction mixture was stirred at 100 °C for 16 h. Subsequently, **3** (1.2 equiv), [Cp\*RhCl<sub>2</sub>]<sub>2</sub> (5 mol%), AgNTf<sub>2</sub> (20 mol%), 1-AdCOOH (1.0 equiv) were directly to the mixture, the reaction mixture was stirred at 80 °C for 13 h under Ar. After cooling to room temperature, Na<sub>2</sub>CO<sub>3</sub> (3.0 equiv) was added to a tube and stirred until acid disappear (monitored by TLC). Then the mixture was filtered over a pad of celite and the filtered was concentrated in vacuo. Purification of the residue by column chromatography (petroleum ether/ethyl acetate = 2/1) to give the single product **5**.

#### 5. Optimization of the Reaction Conditions

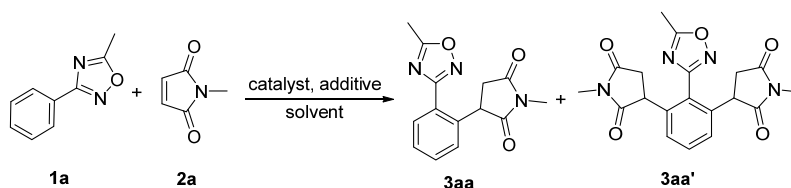

**Table S1. The effect of catalysts, additives and solvents on the reaction<sup>a</sup>**

| Entry | Catalyst                                                                | Additive | Solvent | Yield<br><b>3aa<sup>b</sup></b> | Yield<br><b>3aa'<sup>b</sup></b> |
|-------|-------------------------------------------------------------------------|----------|---------|---------------------------------|----------------------------------|
| 1     | [RuCl <sub>2</sub> (p-cymene)] <sub>2</sub>                             | PivOH    | DCE     | Trace                           | Trace                            |
| 2     | Cp*Rh(CH <sub>3</sub> CN) <sub>3</sub> (SbF <sub>6</sub> ) <sub>2</sub> | PivOH    | DCE     | 44%                             | Trace                            |
| 3     | [Cp*IrCl <sub>2</sub> ] <sub>2</sub>                                    | PivOH    | DCE     | Trace                           | Trace                            |
| 4     | Cp*Co(CO)I <sub>2</sub>                                                 | PivOH    | DCE     | ND                              | Trace                            |
| 5     | [Cp*RhCl <sub>2</sub> ] <sub>2</sub>                                    | PivOH    | DCE     | 75%                             | Trace                            |
| 6     | [Cp*RhCl <sub>2</sub> ] <sub>2</sub>                                    | PivOH    | Toluene | 26%                             | Trace                            |
| 7     | [Cp*RhCl <sub>2</sub> ] <sub>2</sub>                                    | PivOH    | TFE     | 66%                             | Trace                            |
| 8     | [Cp*RhCl <sub>2</sub> ] <sub>2</sub>                                    | PivOH    | DCM     | 51%                             | Trace                            |

|                 |                                      |                         |                    |     |       |
|-----------------|--------------------------------------|-------------------------|--------------------|-----|-------|
| 9               | [Cp*RhCl <sub>2</sub> ] <sub>2</sub> | PivOH                   | THF                | ND  | Trace |
| 10              | [Cp*RhCl <sub>2</sub> ] <sub>2</sub> | PivOH                   | CH <sub>3</sub> OH | ND  | Trace |
| 11              | [Cp*RhCl <sub>2</sub> ] <sub>2</sub> | PivOH                   | 1,4-Dioxane        | 42% | Trace |
| 12              | [Cp*RhCl <sub>2</sub> ] <sub>2</sub> | HOAc                    | DCE                | 67% | Trace |
| 13              | [Cp*RhCl <sub>2</sub> ] <sub>2</sub> | 1-AdCOOH                | DCE                | 80% | Trace |
| 14              | [Cp*RhCl <sub>2</sub> ] <sub>2</sub> | TFA                     | DCE                | 44% | Trace |
| 15              | [Cp*RhCl <sub>2</sub> ] <sub>2</sub> | PhOCH <sub>2</sub> COOH | DCE                | 60% | Trace |
| 16              | [Cp*RhCl <sub>2</sub> ] <sub>2</sub> | PhCOOH                  | DCE                | 63% | Trace |
| 17              | [Cp*RhCl <sub>2</sub> ] <sub>2</sub> | LiOAc·H <sub>2</sub> O  | DCE                | 27% | Trace |
| 18              | [Cp*RhCl <sub>2</sub> ] <sub>2</sub> | AgOAc                   | DCE                | 31% | Trace |
| 19 <sup>c</sup> | [Cp*RhCl <sub>2</sub> ] <sub>2</sub> | 1-AdCOOH                | DCE                | 63% | Trace |
| 20 <sup>d</sup> | [Cp*RhCl <sub>2</sub> ] <sub>2</sub> | 1-AdCOOH                | DCE                | 69% | Trace |
| 21 <sup>e</sup> | [Cp*RhCl <sub>2</sub> ] <sub>2</sub> | 1-AdCOOH                | DCE                | 32% | Trace |
| 22 <sup>f</sup> | [Cp*RhCl <sub>2</sub> ] <sub>2</sub> | HOAc                    | DCE                | 0%  | 99%   |

<sup>a</sup>Reaction conditions: **1a** (0.05 mmol), **2a** (1.2 equiv), [Cp\*RhCl<sub>2</sub>]<sub>2</sub> (5 mol%), additive (1.0 equiv), AgNTf<sub>2</sub> (20 mol%), DCE (0.5 mL), 100 °C, overnight, under Ar. <sup>b</sup>Isolated yield. <sup>c</sup>[Cp\*RhCl<sub>2</sub>]<sub>2</sub> (4 mol%), <sup>d</sup>AgSbF<sub>6</sub> (20 mol%), <sup>e</sup>AgOTf (20 mol%), <sup>f</sup>**2a** (3 equiv), HOAc (1.5 equiv), 130 °C.

**Table S2. The effect of catalyst, additive and solvent on the reaction<sup>a</sup>**

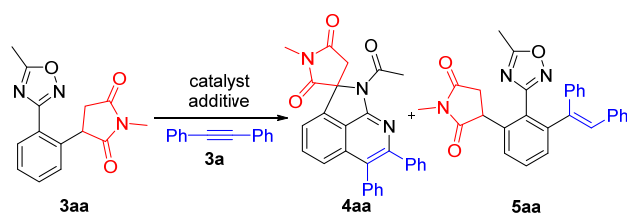

| Entry | Catalyst                                                                | Additive                        | Solvent            | Yield/<br><b>4aa<sup>b</sup></b> | Yield/<br><b>5aa<sup>b</sup></b> |
|-------|-------------------------------------------------------------------------|---------------------------------|--------------------|----------------------------------|----------------------------------|
| 1     | [Cp*RhCl <sub>2</sub> ] <sub>2</sub>                                    | --                              | DCE                | 24%                              | trace                            |
| 2     | [Cp*RhCl <sub>2</sub> ] <sub>2</sub>                                    | K <sub>2</sub> CO <sub>3</sub>  | DCE                | 23%                              | trace                            |
| 3     | [Cp*RhCl <sub>2</sub> ] <sub>2</sub>                                    | LiOAc                           | DCE                | 41%                              | trace                            |
| 4     | [Cp*RhCl <sub>2</sub> ] <sub>2</sub>                                    | NaOAc                           | DCE                | 17%                              | trace                            |
| 5     | [Cp*RhCl <sub>2</sub> ] <sub>2</sub>                                    | Cs <sub>2</sub> CO <sub>3</sub> | DCE                | ND                               | ND                               |
| 6     | [Cp*RhCl <sub>2</sub> ] <sub>2</sub>                                    | TsOH                            | DCE                | 11%                              | trace                            |
| 7     | [Cp*RhCl <sub>2</sub> ] <sub>2</sub>                                    | 1-AdCOOH                        | DCE                | 25%                              | trace                            |
| 8     | Cp*(CO) <sub>2</sub> I <sub>2</sub>                                     | LiOAc                           | DCE                | Trace                            | ND                               |
| 9     | [Cp*IrCl <sub>2</sub> ] <sub>2</sub>                                    | LiOAc                           | DCE                | 30%                              | ND                               |
| 10    | [Ru(p-cymene)Cl <sub>2</sub> ] <sub>2</sub>                             | LiOAc                           | DCE                | 59%                              | ND                               |
| 11    | Cp*Rh(CH <sub>3</sub> CN) <sub>3</sub> (SbF <sub>6</sub> ) <sub>2</sub> | LiOAc                           | DCE                | 32%                              | trace                            |
| 12    | [Cp*RhCl <sub>2</sub> ] <sub>2</sub>                                    | LiOAc                           | MeOH               | ND                               | ND                               |
| 13    | [Cp*RhCl <sub>2</sub> ] <sub>2</sub>                                    | LiOAc                           | Toluene            | 36%                              | Trace                            |
| 14    | [Cp*RhCl <sub>2</sub> ] <sub>2</sub>                                    | LiOAc                           | TFE                | ND                               | ND                               |
| 15    | [Cp*RhCl <sub>2</sub> ]                                                 | LiOAc                           | CH <sub>3</sub> CN | ND                               | ND                               |
| 16    | [Cp*RhCl <sub>2</sub> ]                                                 | LiOAc                           | THF                | ND                               | ND                               |

<sup>a</sup>Reaction conditions: **3aa** (0.025 mmol), **3a** (1.2 equiv), Catalyst (5 mol%), Cu(OAc)<sub>2</sub>·H<sub>2</sub>O (1.0 equiv), additive

(0.5 equiv), AgNTf<sub>2</sub> (20 mol%), DCE (0.5 mL), 100 °C, 13 h under Ar. <sup>b</sup>Isolated yield.

**Table S3. The effect of oxidant, Ag salt and temperature on the reaction<sup>a</sup>**

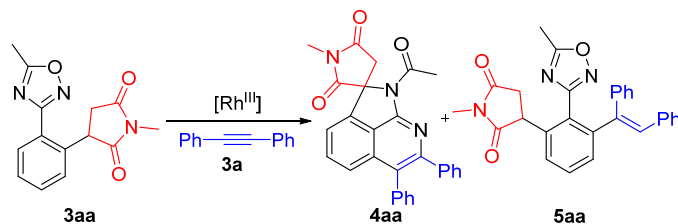

| Entry           | Oxidant                                 | Ag Salt                            | Temp. | Yield/<br>4aa <sup>b</sup> | Yield/<br>5aa <sup>b</sup> |
|-----------------|-----------------------------------------|------------------------------------|-------|----------------------------|----------------------------|
| 1               | Cu(OAc) <sub>2</sub> ·H <sub>2</sub> O  | --                                 | 100   | ND                         | ND                         |
| 2               | Cu(OAc) <sub>2</sub> ·H <sub>2</sub> O  | AgNTf <sub>2</sub>                 | 100   | 41%                        | trace                      |
| 3               | Cu(OAc) <sub>2</sub> ·H <sub>2</sub> O  | AgSbF <sub>6</sub>                 | 100   | 26%                        | trace                      |
| 4               | Cu(OAc) <sub>2</sub> ·H <sub>2</sub> O  | AgBF <sub>4</sub>                  | 100   | 21%                        | trace                      |
| 5               | Cu(OAc) <sub>2</sub> ·H <sub>2</sub> O  | AgOTf                              | 100   | 45%                        | 21%                        |
| 6               | Cu(OAc) <sub>2</sub> ·H <sub>2</sub> O  | CH <sub>3</sub> SO <sub>3</sub> Ag | 100   | 35%                        | trace                      |
| 7               | --                                      | AgOTf                              | 100   | ND                         | trace                      |
| 8               | Cu(OAc) <sub>2</sub>                    | AgOTf                              | 100   | 37%                        | 28%                        |
| 9               | Cu(acac) <sub>2</sub>                   | AgOTf                              | 100   | Trace                      | Trace                      |
| 10              | AgOAc                                   | AgOTf                              | 100   | 19%                        | trace                      |
| 11              | Ag <sub>2</sub> CO <sub>3</sub>         | AgOTf                              | 100   | 19%                        | trace                      |
| 12              | Zn(OAc) <sub>2</sub> ·2H <sub>2</sub> O | AgOTf                              | 100   | ND                         | trace                      |
| 13              | Cu(OAc) <sub>2</sub> ·H <sub>2</sub> O  | AgOTf                              | 80    | 38%                        | trace                      |
| 14              | Cu(OAc) <sub>2</sub> ·H <sub>2</sub> O  | AgOTf                              | 120   | 37%                        | trace                      |
| 15 <sup>c</sup> | Cu(OAc) <sub>2</sub> ·H <sub>2</sub> O  | AgOTf                              | 100   | 60%                        | trace                      |

<sup>a</sup>Reaction conditions: **3aa** (0.025 mmol), **3a** (1.2 equiv), [Cp\*RhCl<sub>2</sub>]<sub>2</sub> (5 mol%), Cu(OAc)<sub>2</sub>·H<sub>2</sub>O (1.0 equiv), LiOAc (0.5 equiv), Ag salt (20 mol%), DCE (0.5 mL), 100 °C, 13 h under Ar. <sup>b</sup>Isolated yield. <sup>c</sup>AgOTf (1.0 equiv).

**Table S4. Invalid 3-Aryloxadiazole<sup>a</sup>**

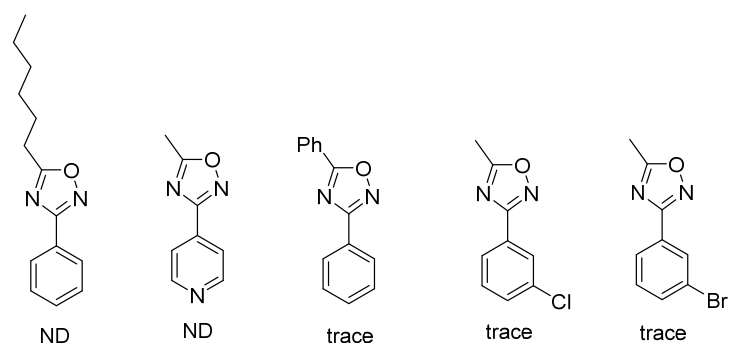

<sup>a</sup>Reaction conditions: **1** (0.05 mmol), **2a** (1.2 equiv), [Cp\*RhCl<sub>2</sub>]<sub>2</sub> (5 mol%), AgNTf<sub>2</sub> (20 mol%), 1-AdCOOH (1.0 equiv), DCE (0.5 mL), 100 °C, under Ar, 5 h. Subsequently, **3a** (1.2 equiv), [Cp\*RhCl<sub>2</sub>]<sub>2</sub> (5 mol%), Cu(OAc)<sub>2</sub>·H<sub>2</sub>O (1.2 equiv), AgOTf (1.0 equiv), LiOAc·2H<sub>2</sub>O (0.5 equiv) were directly to the mixture, 100 °C, under Ar, 13 h.

## 6. Mechanism Study

### (1) H/D exchange experiments

Deuterium-labeling experiments were performed to study the mechanism of this reaction. **1a** (16.0 mg 0.1 mmol), [Cp\*RhCl<sub>2</sub>]<sub>2</sub> (3.0 mg, 5 mol%), 1-AdCOOH (18.0 mg, 1.0 equiv), AgNTf<sub>2</sub> (7.76 mg, 20 mol%) were stirred in DCE (0.9 mL) and D<sub>2</sub>O (0.1 mL) under Ar atmosphere at 100 °C for 3 h. After completion, the reaction mixture was purified by column chromatography (petroleum ether/ethyl acetate =10/1, v/v) to afford the product **1a**+**[D<sub>2</sub>]-1a**. The deuterium rate (96%) was obtained from <sup>1</sup>H NMR. Deuterium was observed at both *ortho*-positions of phenyl ring, which indicated the possibility of the reaction pathway via *ortho* C–H activation.

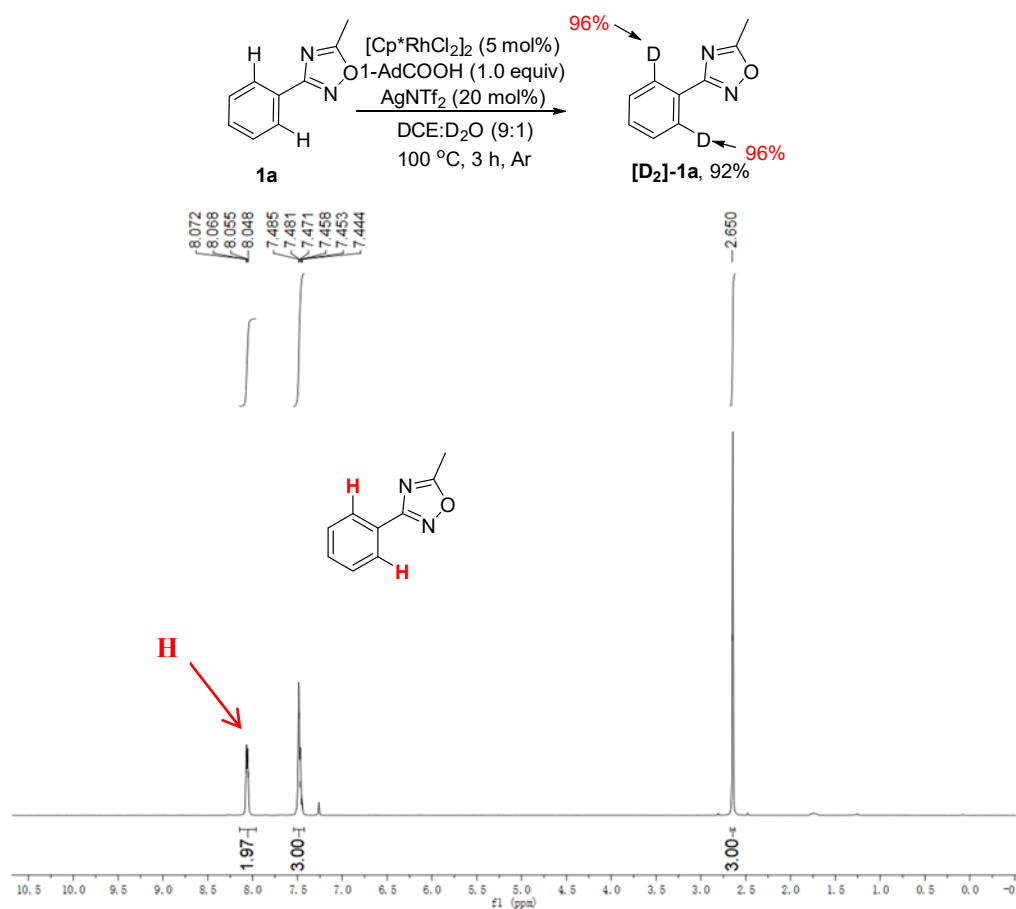

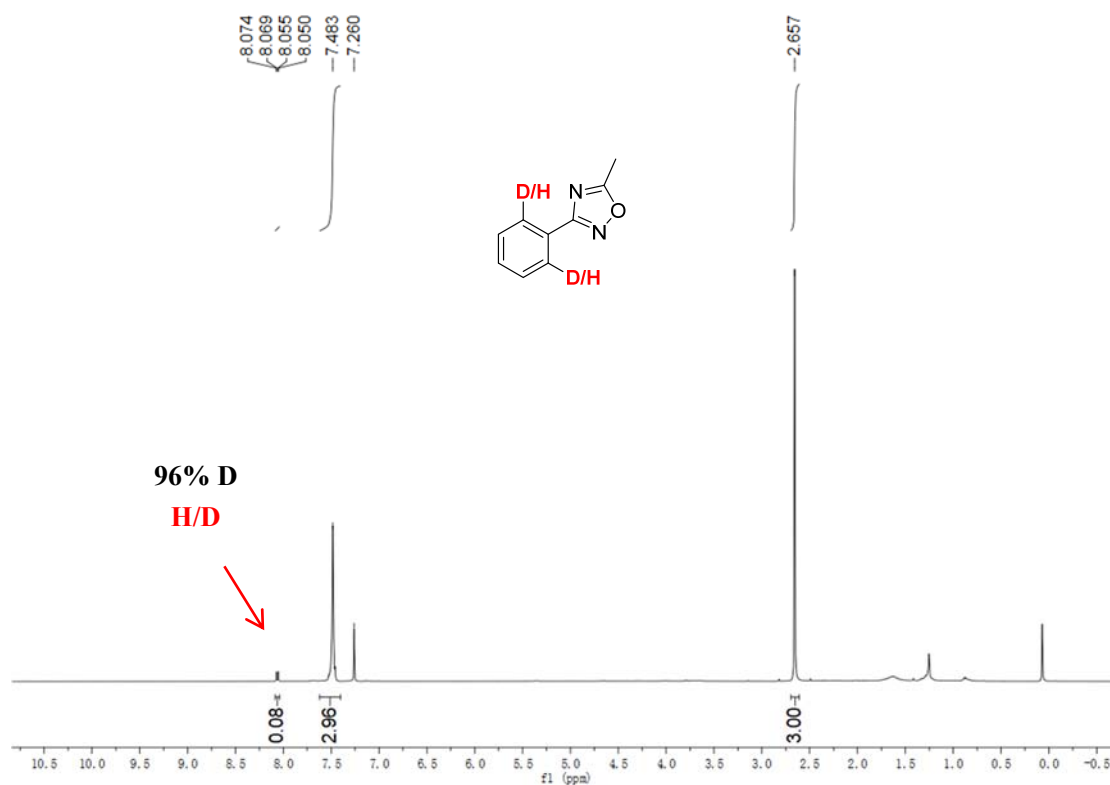

## (2) Preparation of deuterated 5-methyl-3-phenyl-1,2,4-oxadiazole [**D<sub>5</sub>**]-1a substrate<sup>[4]</sup>

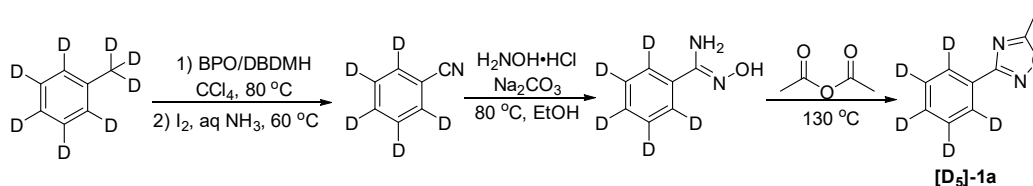

To a solution of toluene- $d_8$  (1.0 g, 10 mmol, 99.5% of D, 1 equiv) in dry  $\text{CCl}_4$  (10 mL) were added DBDMH (1.57 g, 5.5 mmol, 55 mol %) and benzoyl peroxide (0.32 g, 1 mmol, 10 mol%) at room temperature, and the mixture was stirred for 3 hours at 80 °C. Then, the mixture was cooled to room temperature, followed by slow addition of aq.  $\text{NH}_3$  (concentration: 25%, 30 mL) and  $\text{I}_2$  (6.35 g, 25 mmol, 2.7 equiv), and then stirred for 12 hours at 60 °C. The reaction mixture was quenched by the addition of saturated aq.  $\text{Na}_2\text{SO}_3$  (30 mL) and extracted with  $\text{CHCl}_3$  (20 mL $\times$ 3). The organic layer was dried over  $\text{Na}_2\text{SO}_4$ . After removal of the solvent under reduced pressure, the residue (without purification) reacted with sodium carbonate (3.12g, 20 mmol, 2.0 equiv), hydroxylamine hydrochloride (1.39g, 20 mmol, 2.0 equiv), in EtOH (15 mL). The mixture was stirred at reflux temperature overnight. After cooling to room temperature, the mixture was filtered over a pad of celite and evaporated to dryness to give crude product benzamidoxime. Then the acetic anhydride (1.9 mL, 20 mmol, 2.0 equiv) was added and the mixture was heated at 130 °C for 1 h. After cooling to room temperature, the mixture solution was extracted with EtOAc (3  $\times$  20 mL), the combined organic layer was washed with saturated brine, then the combined organic layers were dried ( $\text{MgSO}_4$ ), filtered, and concentrated in vacuo. Purification of the residue by column chromatography (petroleum ether/ethyl acetate = 30/1) to give the product [**D<sub>5</sub>**]-1a. <sup>1</sup>H NMR (400 MHz,  $\text{CDCl}_3$ ):  $\delta$  = 2.65 (s, 3H).

### (3) Kinetic isotope experiments

#### Intermolecular controlled experiment:

There are twice *ortho* C–H activations, the first *ortho* C–H bond kinetic isotope effect (KIE) study was conducted. Two oven-dried 25 mL tubes were separately charged with **1a** (8.0 mg, 0.05 mmol), or [**D**<sub>5</sub>]-**1a** (8.3 mg, 0.05 mmol), and *N*-methylmaleimide **2a** (6.7 mg, 1.2 equiv), [Cp\*RhCl<sub>2</sub>]<sub>2</sub> (1.5 mg, 5 mol%), AgNTf<sub>2</sub> (3.88 mg, 20 mol%), 1-AdCOOH (9.0 mg, 1.0 equiv), DCE (0.5 mL) were added to an oven dried high-pressure tube under Ar atmosphere. The reaction mixture was stirred at 100 °C for 1 h under Ar. After completion, the reaction mixture was purified by flash chromatography eluting with petroleum ether/ ethyl acetate (3/1) to give **3aa** and **3aa-D**<sub>4</sub> in 44% and 40% respectively. The KIE value was determined using isolated yields to give kinetic isotopic effect (KIE)  $k_H/k_D = 1.1$ , thus indicating that the first *ortho* C–H bond cleavage might not be involved in the product determining step.

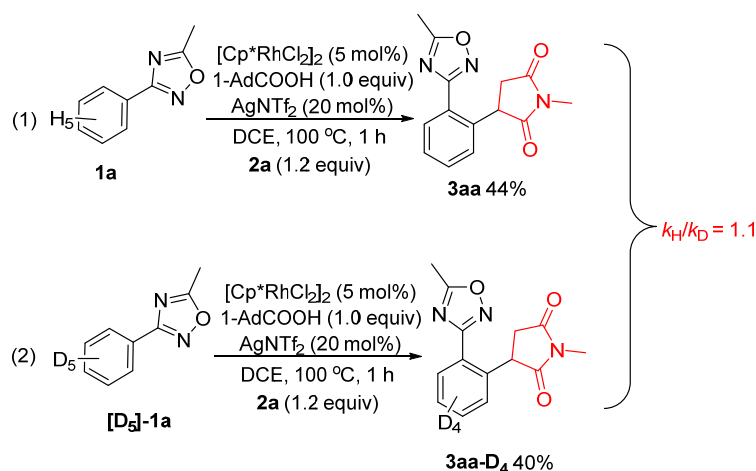

#### Intermolecular competition experiment:

In addition, the first *ortho* C–H bond kinetic isotope effect (KIE) study was conducted. An oven-dried 25 mL tube was charged with **1a** (8.0 mg, 0.05 mmol), [**D**<sub>5</sub>]-**1a** (8.3 mg, 0.05 mmol), and *N*-methylmaleimide **2a** (13.4 mg, 2.4 equiv), [Cp\*RhCl<sub>2</sub>]<sub>2</sub> (3.0 mg, 10 mol%), AgNTf<sub>2</sub> (7.76 mg, 40 mol%), 1-AdCOOH (18.0 mg, 2.0 equiv), DCE (1.0 mL) were added to an oven dried high-pressure tube under Ar atmosphere. The reaction mixture was stirred at 100 °C for 1 h under Ar. After completion, the reaction mixture was purified by flash chromatography eluting with petroleum ether/ ethyl acetate (3/1) to give **3aa** and **3aa-D**<sub>4</sub>. The ratio of two products was determined by <sup>1</sup>H NMR integration method to give kinetic isotopic effect (KIE)  $k_H/k_D = 1.3$ , thus indicating that the first *ortho* C–H bond cleavage might be not involved in the product determining step.

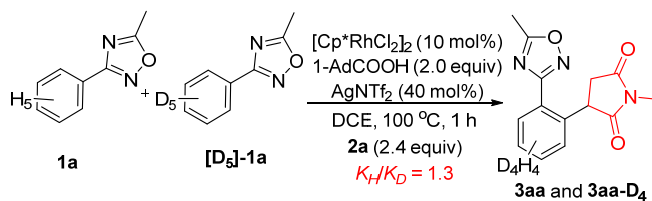



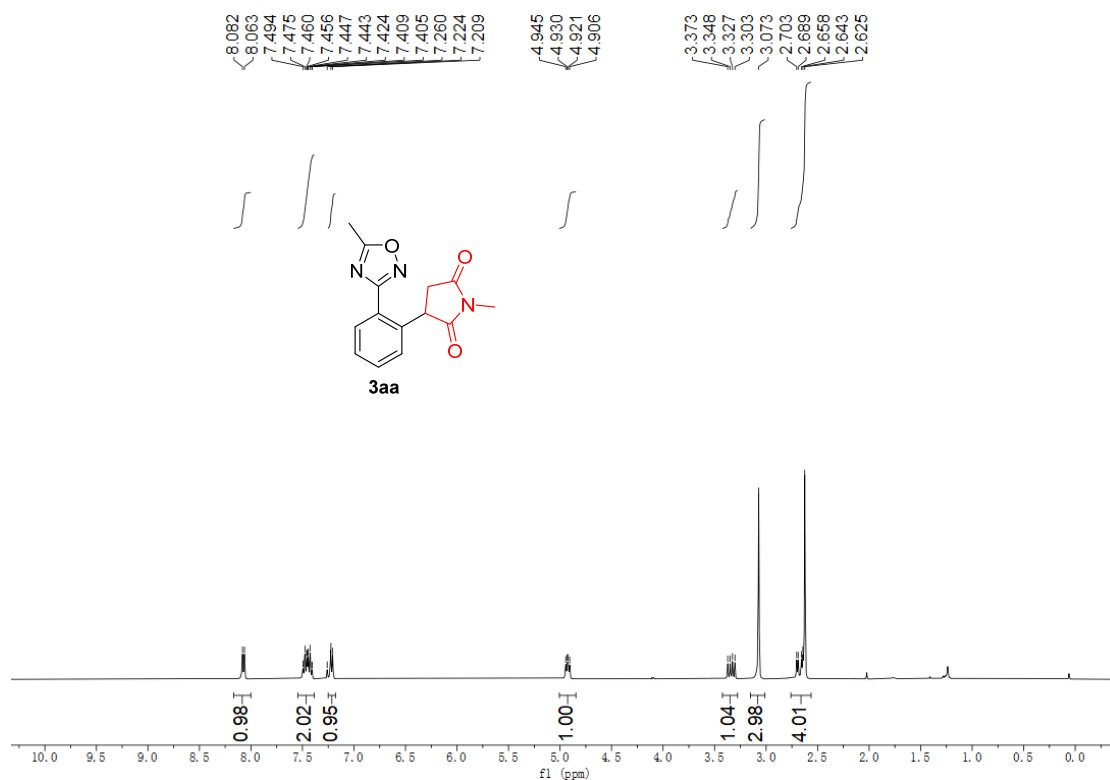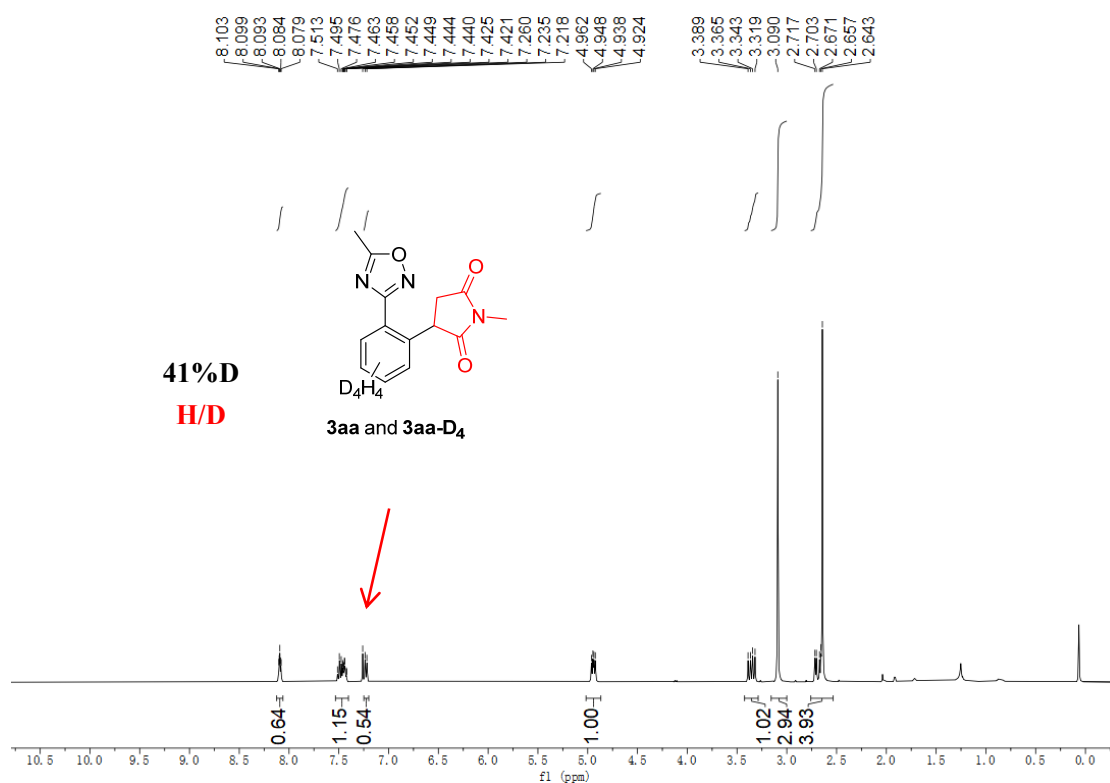

#### Intermolecular controlled experiment:

The second *ortho* C–H bond kinetic isotope effect (KIE) study was conducted. Two oven-dried 25 mL tubes were separately charged with **3aa** (6.8 mg, 0.025 mmol), or [**D<sub>4</sub>**]-**3aa** (6.9 mg, 0.025 mmol), and **3a** (5.3 mg, 1.2 equiv), [Cp\*RhCl<sub>2</sub>]<sub>2</sub> (0.8 mg, 5 mol%), Cu(OAc)<sub>2</sub>•H<sub>2</sub>O (6.0 mg, 1.2 equiv), AgOTf (6.4 mg, 1.0 equiv), LiOAc•2H<sub>2</sub>O (1.3 mg, 0.5 equiv), DCE (0.5 mL) were directly to the mixture, the reaction mixture was stirred at 100 °C for 1 h under Ar. After completion, the

reaction mixture was purified by flash chromatography eluting with petroleum ether/dichloromethane/ethyl acetate (6/3/1) to give **4aa** and **4aa-D<sub>3</sub>** in 26% and 19% respectively and **5aa** and **5aa-D<sub>3</sub>** in 44% and 25% respectively. The KIE value of **4aa** and **4aa-D<sub>3</sub>** was determined using isolated yields to give kinetic isotopic effect (KIE)  $k_H/k_D = 1.4$ , thus indicating that the second C-H bond cleavage might not be involved in the product determining step. And the KIE value of **5aa** and **5aa-D<sub>3</sub>** was determined using isolated yields to give kinetic isotopic effect (KIE)  $k_H/k_D = 1.8$ , thus indicating that the second C-H bond cleavage might not be involved in the product determining step.

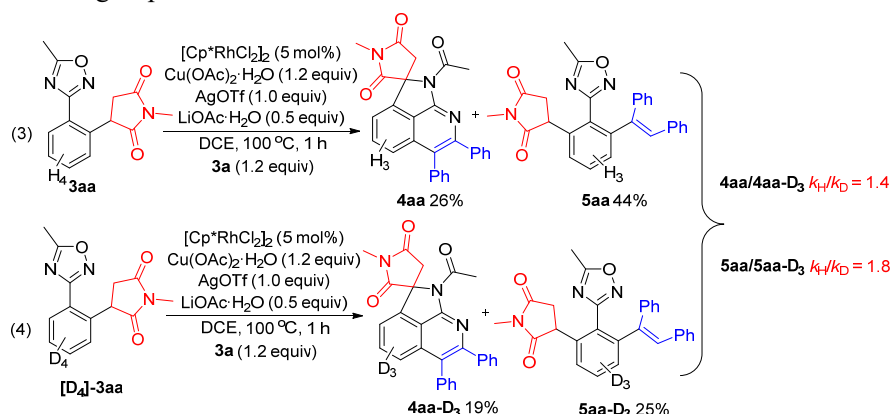

#### Intermolecular competition experiment:

In addition, the second *ortho* C–H bond kinetic isotope effect (KIE) study was conducted. An oven-dried 25 mL tube was charged with **3aa** (6.8 mg, 0.025 mmol), **[D<sub>4</sub>]-3aa** (6.9 mg, 0.025 mmol), and **3a** (10.6 mg, 2.4 equiv),  $[Cp^*RhCl_2]_2$  (1.5 mg, 10 mol%),  $Cu(OAc)_2 \cdot H_2O$  (12.0 mg, 2.4 equiv),  $AgOTf$  (12.8 mg, 2.0 equiv),  $LiOAc \cdot 2H_2O$  (2.6 mg, 1.0 equiv), DCE (1.0 mL) were directly to the mixture, the reaction mixture was stirred at 100 °C for 1 h under Ar. After completion, the reaction mixture was purified by flash chromatography eluting with petroleum ether/dichloromethane/ethyl acetate (6/3/1) to give **4aa/4aa-D<sub>3</sub>** and **5aa/5aa-D<sub>3</sub>** respectively. The ratio of **4aa/4aa-D<sub>3</sub>** was determined by <sup>1</sup>H NMR integration method to give kinetic isotopic effect (KIE)  $k_H/k_D = 1.6$ , thus indicating that the second *ortho* C–H bond cleavage might be not involved in the product determining step. The ratio of **5aa/5aa-D<sub>3</sub>** was determined by <sup>1</sup>H NMR integration method to give kinetic isotopic effect (KIE)  $k_H/k_D = 1.4$ , thus indicating that the second *ortho* C–H bond cleavage might be not involved in the product determining step.

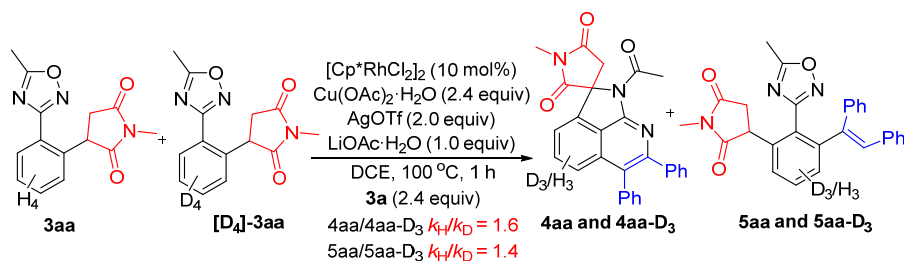

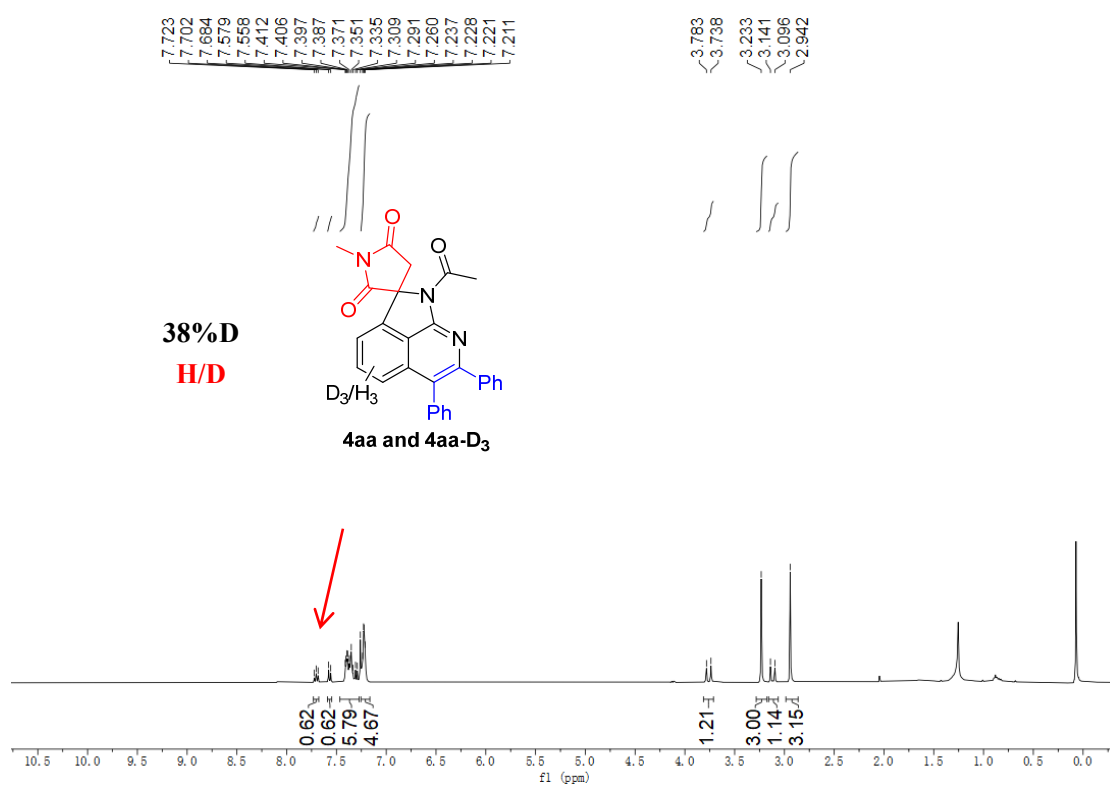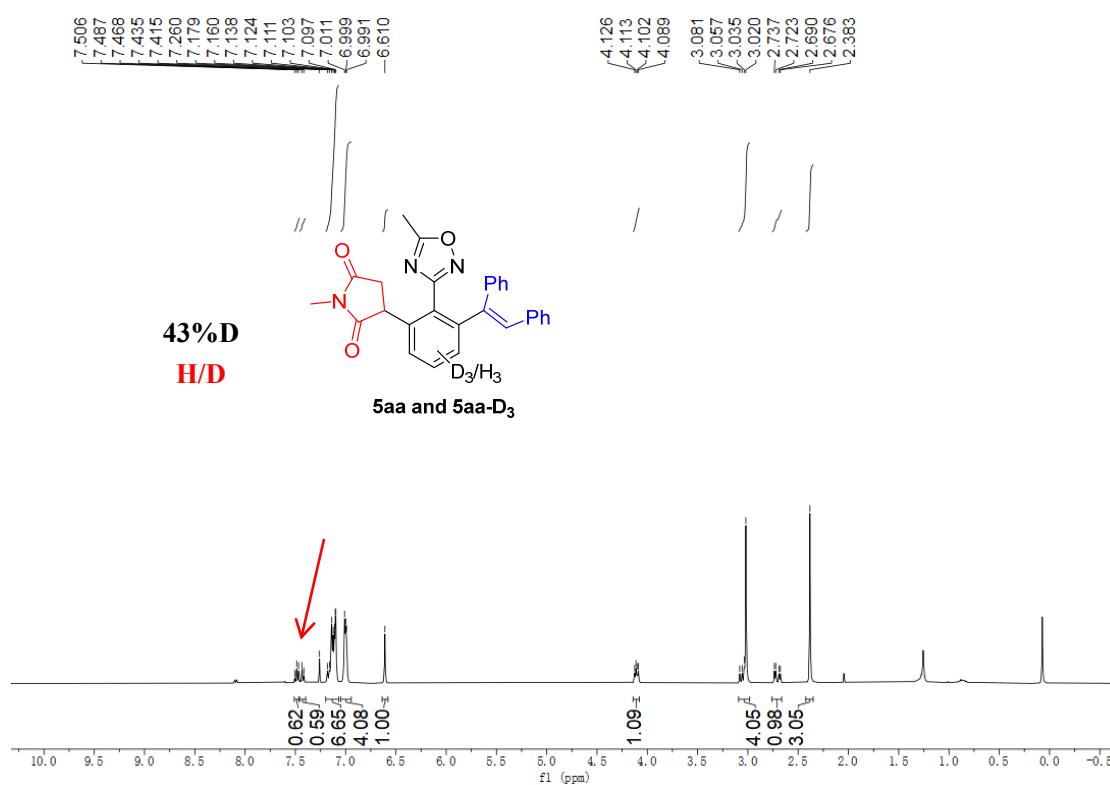

#### (4) Study on Characteristics and Mechanism

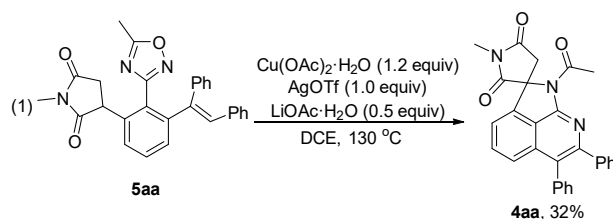

To elucidate the role of copper as an oxidant in the reaction, **5aa** could be transformed to spirocyclization **4aa** in absence of  $[\text{Cp}^*\text{RhCl}_2]_2$  (5 mol%), which also means cross coupling product could be the intermediate in the reaction (eq S1).

To further prove the existence of intermediate **VII**, we tried to isolate intermediate **VII**, which was too little to be separated but can be determined by LC-MS and HRMS (Figure S1). LC-MS: Exact Mass  $[\text{M}+\text{H}]^+$ : 450.1812, Found  $[\text{M}+\text{H}]^+$ : 450.0. HRMS (ESI): Exact Mass  $[\text{M}+\text{H}]^+$ : 450.1812, Found  $[\text{M}+\text{H}]^+$ : 450.1815.

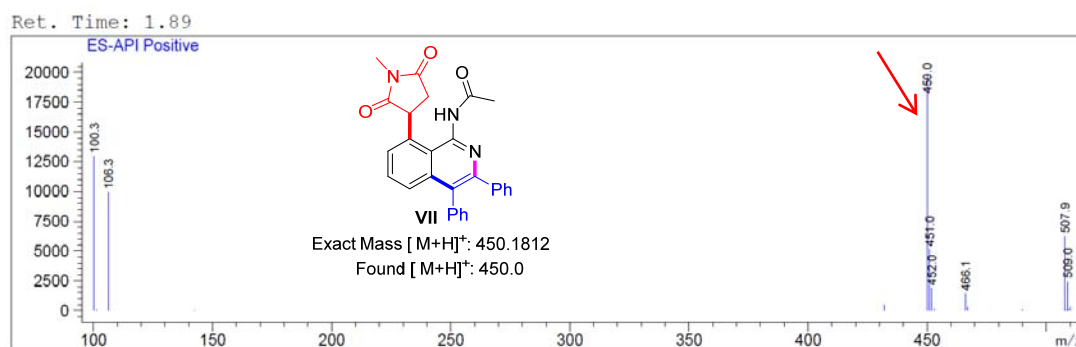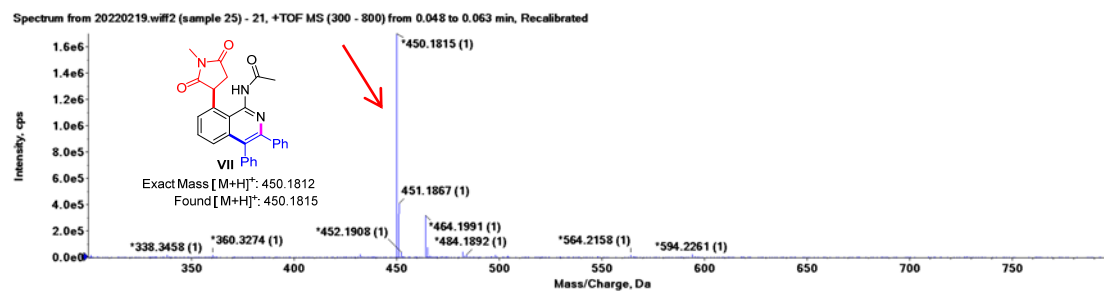

Figure S1 Complex **VII** was Determined by LC-MS and HRMS

To further prove the existence of alkenyl intermediate, a series of reactions were conducted. First, no product **5aa'** was detected when using DDQ as oxidant (eq S2).

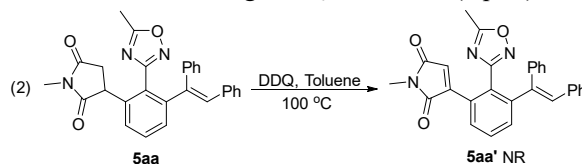

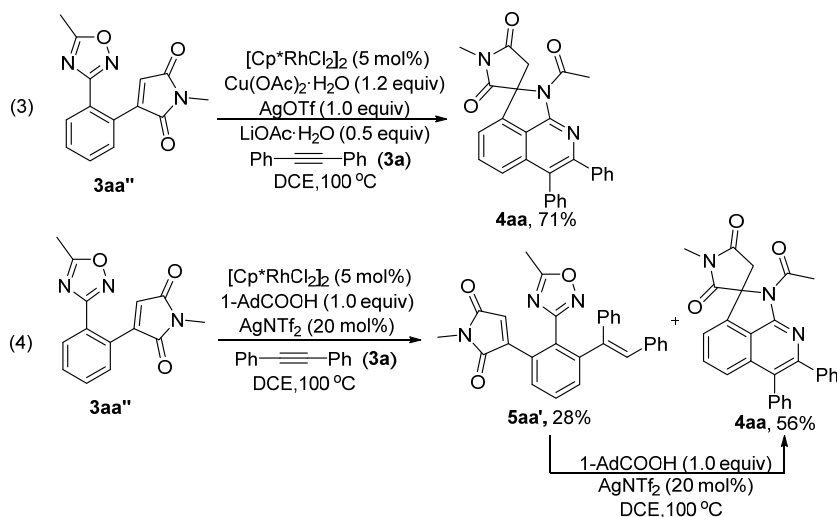

Then, we found that **3aa''** could be transformed to **4aa** in 71% yield in the presence of  $[\text{Cp}^*\text{RhCl}_2]_2$  (5 mol%),  $\text{Cu}(\text{OAc})_2 \cdot \text{H}_2\text{O}$  (1.2 equiv),  $\text{AgOTf}$  (1.0 equiv),  $\text{LiOAc} \cdot 2\text{H}_2\text{O}$  (0.5 equiv) and **3a** (eq S3). And we also found that **3aa''** could be transformed to **5aa'** and **4aa** in 28% and 56% yields, respectively in the presence of  $[\text{Cp}^*\text{RhCl}_2]_2$  (5 mol%),  $\text{AgNTf}_2$  (20 mol%) and 1-AdCOOH (1.0 equiv) (eq S4). **5aa'** and **4aa** have the same polarity and cannot be separated, so the ratio of **5aa'** and **4aa** were determined by  $^1\text{H}$  NMR integration method. Next, **5aa''** could be transformed to spirocyclization **4aa** in absence of  $[\text{Cp}^*\text{RhCl}_2]_2$  (5 mol%) and **3a**, suggesting that the aza-Michael addition did not require any rhodium and copper catalyst. The proportion of **5aa'** and **4aa** with time is shown in the Figure S2.

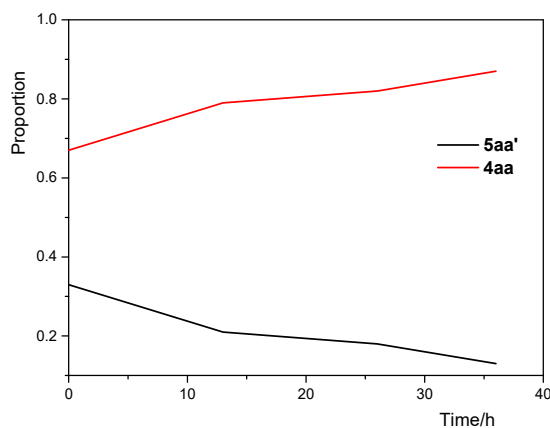

Figure S2 The proportion of **5aa'** and **4aa** with time

In addition, in order to improve the reaction yield, we tried **3aa''** as an intermediate to synthesize the product **4aa** from **1a**. Firstly, we tried some oxidants in the first step, including  $\text{AgOAc}$ ,  $\text{Cu}(\text{OAc})_2$ ,  $\text{Cu}(\text{acac})_2$  and so on, and no product **3aa''** was generated. The desired product **3aa''** could be isolated in 32% yield in the presence of  $[\text{Cp}^*\text{RhCl}_2]_2$ ,  $\text{Ag}_2\text{CO}_3$  and  $\text{AgNTf}_2$ .

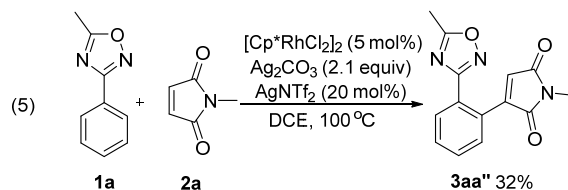

## 7. References

- [1] Y. Yang, C. Wang, *Chem. Eur. J.* **2019**, 25, 8245–8248.  
[2] R. Mandal, B. Emayavaramban, B. Sundararaju, *Org. Lett.* **2018**, 20, 2835–2838.  
[3] Y. Nishii, A.-K. Bachon, S.-H. Moon, C. Bolm, M. Miura, *Chem. Lett.* **2017**, 46, 1347–1349.  
[4] F. Yang, J. J. Yu, Y. Liu and J. Zhu, *Org. Lett.*, **2017**, 19, 2885–2888.

## 8. Characterization Data and NMR Spectra of *N*-acetyl Chain of Spiropyrroloisoquinoline Derivatives

### 1-methyl-3-(2-(5-methyl-1,2,4-oxadiazol-3-yl)phenyl)pyrrolidine-2,5-dione (**3aa**)

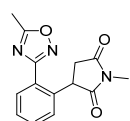

Purification by column chromatography on silica gel (petroleum ether/ethyl acetate = 4/1, v/v) afforded **3aa** as a white solid (10.8 mg, 80% yield). Melting point: 92.3–93.6 °C; <sup>1</sup>H NMR (400 MHz, CDCl<sub>3</sub>): δ = 8.07 (d, *J* = 7.7 Hz, 1H), 7.52 – 7.38 (m, 2H), 7.22 (d, *J* = 7.0 Hz, 1H), 4.93 (dd, *J* = 9.5, 5.7 Hz, 1H), 3.34 (dd, *J* = 18.4, 9.6 Hz, 1H), 3.07 (s, 3H), 2.72 – 2.60 (m, 4H); <sup>13</sup>C NMR (100 MHz, CDCl<sub>3</sub>): δ = 178.3, 176.4, 176.2, 168.1, 136.9, 131.6, 130.9, 129.3, 128.3, 126.2, 45.0, 38.1, 25.2, 12.4; HRMS (ESI): *m/z* calcd for C<sub>14</sub>H<sub>13</sub>N<sub>3</sub>O<sub>3</sub>Na<sup>+</sup> [M+Na]<sup>+</sup>: 294.0849, found: 294.0849.

### 1'-acetyl-1-methyl-6',7'-diphenyl-1'*H*-spiro[pyrrolidine-3,2'-pyrrolo[4,3,2-*ij*]isoquinoline]-2,5-dione (**4aa**)

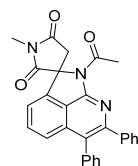

According to general procedure A, purification by column chromatography on silica gel (petroleum ether/ dichloromethane/ethyl acetate = 6/3/1, v/v) afforded **4aa** as a white solid (11.0 mg, 49% yield). Melting point: 295.5–296.4 °C; <sup>1</sup>H NMR (400 MHz, CDCl<sub>3</sub>): δ = 7.66 (t, *J* = 7.7 Hz, 1H), 7.53 (d, *J* = 8.3 Hz, 1H), 7.43 – 7.27 (m, 6H), 7.24 – 7.14 (m, 5H), 3.72 (d, *J* = 18.0 Hz, 1H), 3.19 (s, 3H), 3.08 (d, *J* = 17.9 Hz, 1H), 2.90 (s, 3H); <sup>13</sup>C NMR (100 MHz, CDCl<sub>3</sub>): δ = 173.9, 173.7, 170.3, 156.0, 152.1, 140.6, 138.6, 136.6, 135.3, 133.6, 131.1, 131.0, 130.7, 128.8, 128.6, 127.7, 127.6, 127.5, 125.1, 124.0, 121.2, 117.0, 71.9, 42.4, 25.9, 25.3; HRMS (ESI): *m/z* calcd for C<sub>28</sub>H<sub>21</sub>N<sub>3</sub>O<sub>3</sub>Na<sup>+</sup> [M+Na]<sup>+</sup>: 470.1475, found: 470.1475.

### (*E*)-3-(3-(1,2-diphenylvinyl)-2-(5-methyl-1,2,4-oxadiazol-3-yl)phenyl)-1-methylpyrrolidine-2,5-dione (**5aa**)

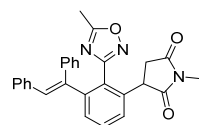

According to general procedure B, purification by column chromatography on silica gel (petroleum ether/ethyl acetate = 2/1, v/v) afforded **5aa** as a white solid (11.9 mg, 53% yield). Melting point: 160.8–161.9 °C; <sup>1</sup>H NMR (400 MHz, CDCl<sub>3</sub>): δ = 7.48 (t, *J* = 7.7 Hz, 1H), 7.45 – 7.40 (m, 1H), 7.20 – 7.08 (m, 7H), 7.00 (m, 4H), 6.61 (s, 1H), 4.11 (dd, *J* = 9.8, 5.5 Hz, 1H), 3.01 (s, 4H), 2.71 (dd, *J* = 18.5, 5.5 Hz, 1H), 2.38 (s, 3H). <sup>13</sup>C NMR (100 MHz, CDCl<sub>3</sub>): δ = 177.5, 176.0, 176.0, 167.6, 146.8, 141.4, 139.7, 138.1, 137.1, 131.7, 130.8, 130.4, 130.3, 129.4, 128.0, 128.0, 127.2, 127.0, 126.9, 126.8, 44.3, 38.4, 25.2, 12.2. HRMS (ESI): *m/z* calcd for C<sub>28</sub>H<sub>23</sub>N<sub>3</sub>O<sub>3</sub>Na<sup>+</sup> [M+Na]<sup>+</sup>: 472.1632, found: 472.1635.

### 1'-acetyl-1,4'-dimethyl-6',7'-diphenyl-1'*H*-spiro[pyrrolidine-3,2'-pyrrolo[4,3,2-*ij*]isoquinoline]-2,5-dione (**4ba**)

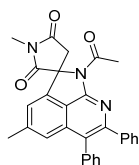

According to general procedure A, purification by column chromatography on silica gel (petroleum ether/ dichloromethane/ethyl acetate = 6/3/1, v/v) afforded **4ba** as a white solid (8.1 mg, 35% yield). Melting point: 268.5–269.9 °C; <sup>1</sup>H NMR (400 MHz, CDCl<sub>3</sub>): δ = 7.42 – 7.33 (m, 5H), 7.32 (s, 1H), 7.26 – 7.16 (m, 5H), 7.12 (s, 1H), 3.75 (d, *J* = 17.9 Hz, 1H), 3.24 (s, 3H), 3.10 (d, *J* = 17.9 Hz, 1H), 2.93 (s, 3H), 2.49 (s, 3H). <sup>13</sup>C NMR (100 MHz, CDCl<sub>3</sub>): δ = 174.0, 173.9, 170.4, 155.8, 152.3, 144.9, 140.7, 138.7, 136.8, 135.3, 131.2, 131.1, 130.7, 128.8, 128.6, 127.7, 127.5, 127.5, 124.8, 123.3, 119.7, 118.7, 71.7, 42.4, 25.9, 25.2, 23.1. HRMS (ESI): *m/z* calcd for C<sub>29</sub>H<sub>24</sub>N<sub>3</sub>O<sub>3</sub><sup>+</sup> [M+H]<sup>+</sup>: 462.1812, found: 462.1814.

**(E)-3-(3-(1,2-diphenylvinyl)-5-methyl-2-(5-methyl-1,2,4-oxadiazol-3-yl)phenyl)-1-methylpyrrolidine-2,5-dione (5ba)**

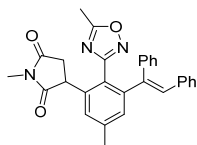

According to general procedure B, purification by column chromatography on silica gel (petroleum ether/ethyl acetate = 2/1, v/v) afforded **5ba** as a colorless oil (12.3 mg, 53% yield). <sup>1</sup>H NMR (400 MHz, CDCl<sub>3</sub>): δ = 7.23 (s, 1H), 7.16 – 7.08 (m, 6H), 7.04 – 6.97 (m, 4H), 6.96 (s, 1H), 6.59 (s, 1H), 4.08 (dd, *J* = 9.7, 5.5 Hz, 1H), 3.11 – 2.98 (m, 4H), 2.69 (dd, *J* = 18.5, 5.5 Hz, 1H), 2.38 (d, *J* = 6.5 Hz, 6H). <sup>13</sup>C NMR (100 MHz, CDCl<sub>3</sub>): δ = 177.8, 176.2, 175.9, 167.7, 146.7, 141.6, 141.1, 139.8, 137.9, 137.2, 131.5, 131.1, 130.5, 129.5, 128.1, 128.0, 127.6, 127.2, 127.0, 124.0, 44.2, 38.5, 25.3, 21.5, 12.2. HRMS (ESI): *m/z* calcd for C<sub>29</sub>H<sub>25</sub>N<sub>3</sub>O<sub>3</sub>Na<sup>+</sup> [M+Na]<sup>+</sup>: 486.1788, found: 486.1786.

**1'-acetyl-4'-methoxy-1-methyl-6',7'-diphenyl-1'H-spiro[pyrrolidine-3,2'-pyrrolo[4,3,2-ij]isoquinoline]-2,5-dione (4ca)**

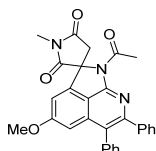

According to general procedure A, purification by column chromatography on silica gel (petroleum ether/ dichloromethane/ethyl acetate = 6/3/1, v/v) afforded **4ca** as a white solid (8.1 mg, 34% yield). Melting point: 208.5–209.4 °C; <sup>1</sup>H NMR (400 MHz, CDCl<sub>3</sub>): δ = 7.43 – 7.30 (m, 5H), 7.25 – 7.16 (m, 5H), 6.89 (d, *J* = 1.7 Hz, 1H), 6.83 (d, *J* = 1.7 Hz, 1H), 3.79 (s, 3H), 3.73 (d, *J* = 18.0 Hz, 1H), 3.22 (s, 3H), 3.09 (d, *J* = 18.0 Hz, 1H), 2.92 (s, 3H). <sup>13</sup>C NMR (100 MHz, CDCl<sub>3</sub>): δ = 173.7, 173.7, 170.3, 165.0, 155.5, 152.9, 140.8, 140.3, 136.9, 136.7, 131.1, 130.9, 130.6, 128.9, 128.7, 127.7, 127.6, 127.5, 124.7, 116.4, 109.0, 103.6, 71.5, 56.2, 42.4, 25.9, 25.1. HRMS (ESI): *m/z* calcd for C<sub>29</sub>H<sub>24</sub>N<sub>3</sub>O<sub>4</sub><sup>+</sup> [M+H]<sup>+</sup>: 478.1761, found: 478.1761.

**(E)-3-(3-(1,2-diphenylvinyl)-5-methoxy-2-(5-methyl-1,2,4-oxadiazol-3-yl)phenyl)-1-methylpyrrolidine-2,5-dione (5ca)**

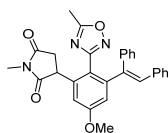

According to general procedure B, purification by column chromatography on silica gel (petroleum ether/ethyl acetate = 2/1, v/v) afforded **5ca** as a white solid (9.1 mg, 38% yield). Melting point: 162.9–163.8 °C; <sup>1</sup>H NMR (400 MHz, CDCl<sub>3</sub>): δ = 7.17 – 7.08 (m, 6H), 7.04 – 6.98 (m, 4H), 6.94 (d, *J* = 2.6 Hz, 1H), 6.68 (d, *J* = 2.4 Hz, 1H), 6.63 (s, 1H), 4.10 (dd, *J* = 9.7, 5.6 Hz, 1H), 3.83 (s, 3H), 3.08 – 2.97 (m, 4H), 2.70 (dd, *J* = 18.5, 5.5 Hz, 1H), 2.36 (s, 3H). <sup>13</sup>C NMR (100 MHz, CDCl<sub>3</sub>): δ = 177.5, 176.0, 175.9, 167.6, 161.0, 148.5, 141.7, 139.5, 139.5, 137.1, 131.6, 130.4, 129.5, 128.1, 127.2, 127.1, 119.1, 115.3, 113.2, 55.7, 44.4, 38.3, 25.3, 12.2. HRMS (ESI): *m/z* calcd for C<sub>29</sub>H<sub>26</sub>N<sub>3</sub>O<sub>4</sub><sup>+</sup> [M+H]<sup>+</sup>: 480.1918, found: 480.1915.

**1'-acetyl-4'-(*tert*-butyl)-1-methyl-6',7'-diphenyl-1'*H*-spiro[pyrrolidine-3,2'-pyrrolo[4,3,2-*ij*]isoquinoline]-2,5-dione (4da)**

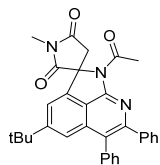

According to general procedure A, purification by column chromatography on silica gel (petroleum ether/ dichloromethane/ethyl acetate = 6/3/1, v/v) afforded **4da** as a white solid (10.3 mg, 41% yield). Melting point: 261.4–263.2 °C; <sup>1</sup>H NMR (400 MHz, CDCl<sub>3</sub>): δ = 7.55 (s, 1H), 7.44 – 7.29 (m, 6H), 7.26 – 7.14 (m, 5H), 3.74 (d, *J* = 18.0 Hz, 1H), 3.25 (s, 3H), 3.13 (d, *J* = 18.0 Hz, 1H), 2.93 (s, 3H), 1.31 (s, 9H). <sup>13</sup>C NMR (100 MHz, CDCl<sub>3</sub>): δ = 174.2, 174.1, 170.4, 158.4, 155.7, 152.2, 140.8, 138.4, 136.7, 134.9, 131.2, 131.0, 130.7, 128.7, 128.6, 127.7, 127.5, 127.5, 125.2, 119.8, 119.7, 115.3, 72.0, 42.7, 36.4, 31.6, 26.0, 25.2. HRMS (ESI): *m/z* calcd for C<sub>32</sub>H<sub>30</sub>N<sub>3</sub>O<sub>3</sub><sup>+</sup> [M+H]<sup>+</sup>: 504.2282, found: 504.2286.

**(*E*)-3-(5-(*tert*-butyl)-3-(1,2-diphenylvinyl)-2-(5-methyl-1,2,4-oxadiazol-3-yl)phenyl)-1-methyl pyrrolidine-2,5-dione (5da)**

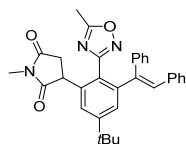

According to general procedure B, purification by column chromatography on silica gel (petroleum ether/ethyl acetate = 2/1, v/v) afforded **5da** as a white solid (11.9 mg, 47% yield). Melting point: 103.7–105.2 °C; <sup>1</sup>H NMR (400 MHz, CDCl<sub>3</sub>): δ = 7.46 (d, *J* = 2.0 Hz, 1H), 7.15 (d, *J* = 2.0 Hz, 1H), 7.14 – 7.07 (m, 6H), 7.05 – 7.00 (m, 2H), 7.00 – 6.95 (m, 2H), 6.64 (s, 1H), 4.10 (dd, *J* = 9.7, 5.7 Hz, 1H), 3.08 – 2.96 (m, 4H), 2.72 (dd, *J* = 18.5, 5.6 Hz, 1H), 2.35 (s, 3H), 1.34 (s, 9H). <sup>13</sup>C NMR (100 MHz, CDCl<sub>3</sub>): δ = 177.7, 176.2, 175.8, 167.7, 154.1, 146.5, 142.2, 139.7, 137.4, 137.3, 131.4, 130.5, 129.5, 128.0, 128.0, 127.6, 127.1, 127.0, 124.3, 123.9, 44.8, 38.4, 35.1, 31.3, 25.2, 12.2. HRMS (ESI): *m/z* calcd for C<sub>32</sub>H<sub>31</sub>N<sub>3</sub>O<sub>3</sub>Na<sup>+</sup> [M+Na]<sup>+</sup>: 528.2258, found: 528.2260.

**1'-acetyl-1-methyl-4',6',7'-triphenyl-1'*H*-spiro[pyrrolidine-3,2'-pyrrolo[4,3,2-*ij*]isoquinoline]-2,5-dione (4ea)**

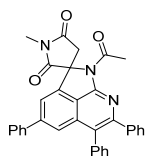

According to general procedure A, purification by column chromatography on silica gel (petroleum ether/ dichloromethane/ethyl acetate = 6/3/1, v/v) afforded **4ea** as a white solid (10.2 mg, 39% yield). Melting point: 271.6–272.3 °C; <sup>1</sup>H NMR (400 MHz, CDCl<sub>3</sub>): δ = 7.70 (s, 1H), 7.53 – 7.48 (m, 2H), 7.48 – 7.39 (m, 6H), 7.39 – 7.31 (m, 3H), 7.30 – 7.25 (m, 2H), 7.25 – 7.20 (m, 3H), 3.80 (d, *J* = 18.0 Hz, 1H), 3.25 (s, 3H), 3.19 (d, *J* = 18.0 Hz, 1H), 2.96 (s, 3H). <sup>13</sup>C NMR (100 MHz, CDCl<sub>3</sub>): δ = 173.9, 173.8, 170.3, 156.0, 152.7, 147.9, 140.7, 140.6, 139.3, 136.6, 135.4, 131.2, 131.1, 130.7, 129.2, 128.9, 128.7, 128.6, 128.1, 127.8, 127.6, 127.6, 125.2, 122.6, 120.4, 117.0, 72.0, 42.5, 26.0, 25.3. HRMS (ESI): *m/z* calcd for C<sub>34</sub>H<sub>26</sub>N<sub>3</sub>O<sub>3</sub><sup>+</sup> [M+H]<sup>+</sup>: 524.1968, found: 524.1963.

**(*E*)-3-(5-(1,2-diphenylvinyl)-4-(5-methyl-1,2,4-oxadiazol-3-yl)-[1,1'-biphenyl]-3-yl)-1-methyl pyrrolidine-2,5-dione (5ea)**

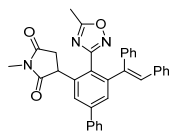

According to general procedure B, purification by column chromatography on silica gel (petroleum ether/ethyl acetate = 2/1, v/v) afforded **5ea** as a white solid (12.1 mg, 46% yield). Melting point: 182.6–183.7 °C; <sup>1</sup>H NMR (400 MHz, CDCl<sub>3</sub>): δ = 7.65 (d, *J* = 1.8 Hz, 1H), 7.59 (dd, *J* = 6.9, 1.7 Hz, 2H), 7.49 – 7.42 (m, 2H), 7.41 – 7.34 (m, 2H), 7.17 – 7.09 (m, 6H), 7.08 – 7.00 (m, 4H), 6.70 (s, 1H), 4.19 (dd, *J* =



9.7, 5.6 Hz, 1H), 3.14 – 3.00 (m, 4H), 2.78 (dd,  $J = 18.5, 5.6$  Hz, 1H), 2.39 (s, 3H).  $^{13}\text{C}$  NMR (100 MHz,  $\text{CDCl}_3$ ):  $\delta = 177.6, 176.0, 176.0, 167.6, 147.4, 143.9, 141.6, 139.7, 139.6, 138.5, 137.2, 131.9, 130.5, 129.5, 129.1, 129.1, 128.4, 128.1, 128.1, 127.5, 127.3, 127.2, 125.8, 125.6, 44.5, 38.5, 25.3, 12.2$ . HRMS (ESI):  $m/z$  calcd for  $\text{C}_{34}\text{H}_{27}\text{N}_3\text{O}_3\text{Na}^+$   $[\text{M}+\text{Na}]^+$ : 548.1945, found: 548.1941.

**1'-acetyl-4'-bromo-1-methyl-6',7'-diphenyl-1'H-spiro[pyrrolidine-3,2'-pyrrolo[4,3,2-*ij*]isoquinoline]-2,5-dione (4fa)**

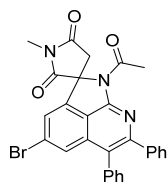

According to general procedure A, purification by column chromatography on silica gel (petroleum ether/ dichloromethane/ethyl acetate = 6/3/1, v/v) afforded **4fa** as a white solid (7.9 mg, 30% yield). Melting point: 197.9–199.3 °C;  $^1\text{H}$  NMR (400 MHz,  $\text{CDCl}_3$ ):  $\delta = 7.71$  (s, 1H), 7.40 (s, 1H), 7.40 – 7.33 (m, 5H), 7.25 – 7.17 (m, 5H), 3.74 (d,  $J = 18.0$  Hz, 1H), 3.24 (s, 3H), 3.11 (d,  $J = 18.0$  Hz, 1H), 2.92 (s, 3H).  $^{13}\text{C}$  NMR (100 MHz,  $\text{CDCl}_3$ ):  $\delta = 173.3, 173.3, 170.2, 155.8, 153.5, 140.3, 140.2, 136.3, 136.0, 131.1, 130.9, 130.6, 129.0, 128.9, 128.5, 127.9, 127.8, 127.8, 126.6, 124.2, 120.8, 119.8, 71.5, 42.2, 26.1, 25.3$ . HRMS (ESI):  $m/z$  calcd for  $\text{C}_{28}\text{H}_{21}\text{BrN}_3\text{O}_3^+$   $[\text{M}+\text{H}]^+$ : 526.0761, found: 526.0759.

**(*E*)-3-(5-bromo-3-(1,2-diphenylvinyl)-2-(5-methyl-1,2,4-oxadiazol-3-yl)phenyl)-1-methylpyrrolidine-2,5-dione (5fa)**

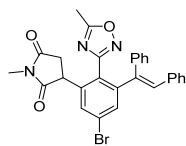

According to general procedure B, purification by column chromatography on silica gel (petroleum ether/ethyl acetate = 2/1, v/v) afforded **5fa** as a colorless oil (10.8 mg, 41% yield).  $^1\text{H}$  NMR (400 MHz,  $\text{CDCl}_3$ ):  $\delta = 7.59$  (d,  $J = 2.0$  Hz, 1H), 7.32 (d,  $J = 2.0$  Hz, 1H), 7.19 – 7.08 (m, 6H), 7.03 – 6.95 (m, 4H), 6.61 (s, 1H), 4.08 (dd,  $J = 9.7, 5.6$  Hz, 1H), 3.08 – 2.98 (m, 4H), 2.69 (dd,  $J = 18.5, 5.6$  Hz, 1H), 2.38 (s, 3H).  $^{13}\text{C}$  NMR (100 MHz,  $\text{CDCl}_3$ ):  $\delta = 176.9, 176.3, 175.5, 167.1, 148.6, 140.2, 139.9, 139.1, 136.7, 133.2, 132.6, 130.4, 130.0, 129.5, 128.2, 128.1, 127.5, 127.4, 126.0, 125.1, 44.1, 38.2, 25.4, 12.2$ . HRMS (ESI):  $m/z$  calcd for  $\text{C}_{28}\text{H}_{22}\text{BrN}_3\text{O}_3\text{Na}^+$   $[\text{M}+\text{Na}]^+$ : 550.0737, found: 550.0743.

**1'-acetyl-1,5'-dimethyl-6',7'-diphenyl-1'H-spiro[pyrrolidine-3,2'-pyrrolo[4,3,2-*ij*]isoquinoline]-2,5-dione (4ga)**

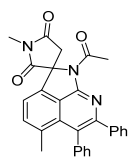

According to general procedure A, purification by column chromatography on silica gel (petroleum ether/ dichloromethane/ethyl acetate = 6/3/1, v/v) afforded **4ga** as a white solid (11.1 mg, 48% yield). Melting point: 259.9–260.8 °C;  $^1\text{H}$  NMR (400 MHz,  $\text{CDCl}_3$ ):  $\delta = 7.45$  (d,  $J = 7.2$  Hz, 1H), 7.31 – 7.23 (m, 5H), 7.23 – 7.11 (m, 6H), 3.73 (d,  $J = 17.9$  Hz, 1H), 3.22 (s, 3H), 3.07 (d,  $J = 18.0$  Hz, 1H), 2.88 (s, 3H), 1.88 (s, 3H).  $^{13}\text{C}$  NMR (100 MHz,  $\text{CDCl}_3$ ):  $\delta = 174.2, 173.9, 170.4, 156.3, 153.4, 141.3, 139.0, 136.9, 136.1, 135.6, 133.7, 131.9, 130.3, 127.9, 127.8, 127.6, 127.4, 127.1, 125.8, 121.7, 117.1, 71.0, 42.6, 25.9, 25.4, 22.3$ . HRMS (ESI):  $m/z$  calcd for  $\text{C}_{29}\text{H}_{24}\text{N}_3\text{O}_3^+$   $[\text{M}+\text{H}]^+$ : 462.1812, found: 462.1813.

**(*Z/E*)-3-(3-(1,2-diphenylvinyl)-4-methyl-2-(5-methyl-1,2,4-oxadiazol-3-yl)phenyl)-1-methylpyrrolidine-2,5-dione (5ga)**

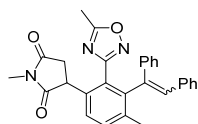

According to general procedure B, purification by column chromatography on silica gel (petroleum ether/ethyl acetate = 2/1, v/v) afforded **5ga** ( $Z/E = 1:1.2$

and cannot be separated) as a colorless oil (12.3 mg, 53% yield).  $^1\text{H}$  NMR (400 MHz,  $\text{CDCl}_3$ ):  $\delta$  = 7.32 (t,  $J$  = 8.1 Hz, 1H), 7.20 – 7.04 (m, 9H), 7.00 (q,  $J$  = 4.7 Hz, 2H), 6.42 (d,  $J$  = 47.6 Hz, 1H), 4.10 – 4.01 (m, 1H), 3.22 – 3.06 (m, 1H), 3.02 (d,  $J$  = 14.4 Hz, 3H), 2.85– 2.65 (m, 1H), 2.41 (d,  $J$  = 5.3 Hz, 3H), 2.14 (d,  $J$  = 30.9 Hz, 3H).  $^{13}\text{C}$  NMR (100 MHz,  $\text{CDCl}_3$ ):  $\delta$  = 177.9, 177.7, 176.2, 176.2, 176.1, 176.0, 168.3, 168.2, 145.3, 145.1, 139.9, 139.3, 139.0, 139.0, 137.5, 137.4, 137.3, 137.2, 135.3, 135.2, 133.1, 133.0, 132.4, 131.7, 130.7, 130.4, 129.2, 129.2, 128.1, 127.9, 127.2, 127.2, 127.0, 126.9, 126.8, 44.7, 44.5, 38.7, 38.6, 25.3, 25.2, 20.6, 20.5, 12.3, 12.2. HRMS (ESI):  $m/z$  calcd for  $\text{C}_{29}\text{H}_{25}\text{N}_3\text{O}_3\text{Na}^+$   $[\text{M}+\text{Na}]^+$ : 486.1788, found: 486.1784.

**4-acetyl-1'-methyl-1,2-diphenyl-4*H*-spiro[benzo[*f*]pyrrolo[4,3,2-*ij*]isoquinoline-5,3'-pyrrolidine]-2',5'-dione (4ha)**

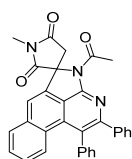

According to general procedure A, purification by column chromatography on silica gel (petroleum ether/ dichloromethane/ethyl acetate = 6/3/1, v/v) afforded **4ha** as a white solid (11.9 mg, 48% yield). Melting point: 279.8–281.0 °C;  $^1\text{H}$  NMR (400 MHz,  $\text{CDCl}_3$ ):  $\delta$  = 7.90 (d,  $J$  = 8.2 Hz, 1H), 7.61 (s, 1H), 7.57 (t,  $J$  = 7.5 Hz, 1H), 7.43 – 7.36 (m, 4H), 7.32 – 7.27 (m, 3H), 7.25 – 7.18 (m, 4H), 3.82 (d,  $J$  = 17.9 Hz, 1H), 3.28 (s, 3H), 3.19 (d,  $J$  = 17.9 Hz, 1H), 2.92 (s, 3H).  $^{13}\text{C}$  NMR (100 MHz,  $\text{CDCl}_3$ ):  $\delta$  = 174.3, 174.1, 170.5, 155.9, 155.4, 141.2, 139.2, 136.8, 135.2, 133.2, 131.3, 131.2, 130.3, 130.1, 129.3, 129.1, 129.0, 128.5, 128.0, 127.6, 127.5, 127.2, 127.1, 126.9, 119.0, 119.0, 70.7, 43.1, 25.9, 25.4. HRMS (ESI):  $m/z$  calcd for  $\text{C}_{32}\text{H}_{24}\text{N}_3\text{O}_3^+$   $[\text{M}+\text{H}]^+$ : 498.1812, found: 498.1816.

**(*Z/E*)-3-(4-(1,2-diphenylvinyl)-3-(5-methyl-1,2,4-oxadiazol-3-yl)naphthalen-2-yl)-1-methylpyrrolidine-2,5-dione (5ha)**

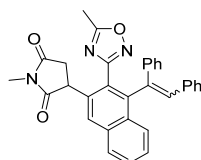

According to general procedure B, purification by column chromatography on silica gel (petroleum ether/ethyl acetate = 2/1, v/v) afforded **5ha** (*Z/E* = 1:1.1 and cannot be separated) as a colorless oil (16.2 mg, 65% yield).  $^1\text{H}$  NMR (400 MHz,  $\text{CDCl}_3$ ):  $\delta$  = 8.11 (dd,  $J$  = 17.1, 8.1 Hz, 1H), 7.84 (d,  $J$  = 8.2 Hz, 1H), 7.72 (s, 1H), 7.56 – 7.49 (m, 1H), 7.48 – 7.40 (m, 1H), 7.21 – 7.06 (m, 10H), 6.65 (d,  $J$  = 23.4 Hz, 1H), 4.31 – 4.20 (m, 1H), 3.16 – 3.03 (m, 4H), 2.94 – 2.77 (m, 1H), 2.45 (s, 3H).  $^{13}\text{C}$  NMR (100 MHz,  $\text{CDCl}_3$ ):  $\delta$  = 177.7, 177.6, 176.2, 176.1, 176.0, 168.1, 168.1, 144.7, 144.7, 139.7, 139.6, 138.3, 137.9, 137.2, 137.1, 134.4, 134.0, 133.9, 133.5, 131.7, 131.6, 130.2, 130.1, 129.3, 129.3, 128.2, 128.1, 127.7, 127.4, 127.3, 127.2, 127.2, 124.8, 124.8, 45.0, 44.9, 38.5, 38.5, 25.3, 25.3, 12.3, 12.2. HRMS (ESI):  $m/z$  calcd for  $\text{C}_{32}\text{H}_{26}\text{N}_3\text{O}_3^+$   $[\text{M}+\text{H}]^+$ : 500.1969, found: 500.1967.

**1'-acetyl-4',5'-dimethoxy-1-methyl-6',7'-diphenyl-1'*H*-spiro[pyrrolidine-3,2'-pyrrolo[4,3,2-*ij*]isoquinoline]-2,5-dione (4ia)**

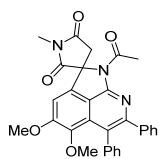

According to general procedure A, purification by column chromatography on silica gel (petroleum ether/ dichloromethane/ethyl acetate = 6/3/1, v/v) afforded **4ia** as a white solid (8.4 mg, 33% yield). Melting point: 279.2–280.5 °C;  $^1\text{H}$  NMR (400 MHz,  $\text{CDCl}_3$ ):  $\delta$  = 7.34 – 7.28 (m, 3H), 7.26 – 7.14 (m, 7H), 7.01 (s, 1H), 3.95 (s, 3H), 3.73 (d,  $J$  = 18.0 Hz, 1H), 3.24 (s, 3H), 3.11 (d,  $J$  = 18.1 Hz, 1H), 3.06 (s, 3H), 2.89 (s, 3H).  $^{13}\text{C}$  NMR (100 MHz,  $\text{CDCl}_3$ ):  $\delta$  = 174.1, 173.9, 170.4, 157.6, 155.8, 153.4, 144.3, 141.1, 138.3, 134.9, 131.8, 131.5, 130.6, 129.5, 127.5, 127.3, 127.2, 127.1, 126.8, 123.0, 117.1, 105.0,

71.2, 60.8, 57.2, 42.5, 26.0, 25.2. HRMS (ESI):  $m/z$  calcd for  $C_{30}H_{25}N_3O_5Na^+$   $[M+Na]^+$ : 530.1686, found: 530.1684.

**(E)-3-(3-(1,2-diphenylvinyl)-4,5-dimethoxy-2-(5-methyl-1,2,4-oxadiazol-3-yl)phenyl)-1-methylpyrrolidine-2,5-dione (5ia)**

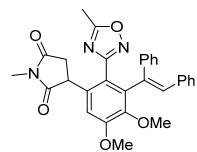

According to general procedure B, purification by column chromatography on silica gel (petroleum ether/ethyl acetate = 2/1, v/v) afforded **5ia** as a colorless oil (18.8 mg, 74% yield).  $^1H$  NMR (400 MHz,  $CDCl_3$ ):  $\delta$  = 7.30 – 7.20 (m, 2H), 7.20 – 7.05 (m, 6H), 7.00 – 6.92 (m, 2H), 6.69 (s, 1H), 6.35 (s, 1H), 4.21 – 4.08 (m, 1H), 3.87 (s, 3H), 3.40 – 3.23 (m, 3H), 3.14 – 2.94 (m, 4H), 2.90 – 2.68 (m, 1H), 2.43 (s, 3H).  $^{13}C$  NMR (100 MHz,  $CDCl_3$ ):  $\delta$  = 176.1, 176.0, 167.8, 154.7, 146.8, 140.3, 137.2, 133.4, 130.3, 129.3, 128.0, 127.9, 127.0, 126.9, 60.1, 56.1, 44.9, 38.5, 25.3, 12.3. HRMS (ESI):  $m/z$  calcd for  $C_{30}H_{27}N_3O_5Na^+$   $[M+Na]^+$ : 532.1843, found: 532.1850.

**1'-acetyl-1-ethyl-6',7'-diphenyl-1'H-spiro[pyrrolidine-3,2'-pyrrolo[4,3,2-ij]isoquinoline]-2,5-dione (4ab)**

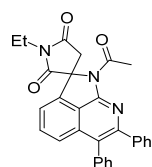

According to general procedure A, purification by column chromatography on silica gel (petroleum ether/ dichloromethane/ethyl acetate = 6/3/1, v/v) afforded **4ab** as a white solid (8.3 mg, 36% yield). Melting point: 284.5–286.2 °C;  $^1H$  NMR (400 MHz,  $CDCl_3$ ):  $\delta$  = 7.70 (t,  $J$  = 7.7 Hz, 1H), 7.57 (d,  $J$  = 8.4 Hz, 1H), 7.44 – 7.31 (m, 5H), 7.30 – 7.18 (m, 6H), 3.85 – 3.70 (m, 3H), 3.08 (d,  $J$  = 17.9 Hz, 1H), 2.95 (s, 3H), 1.33 (t,  $J$  = 7.2 Hz, 3H).  $^{13}C$  NMR (100 MHz,  $CDCl_3$ ):  $\delta$  = 173.5, 170.3, 156.1, 152.1, 140.6, 138.8, 136.6, 135.3, 133.6, 131.1, 130.7, 128.7, 127.8, 127.6, 127.5, 125.1, 124.0, 121.3, 116.8, 71.9, 42.4, 34.9, 25.3, 12.9. HRMS (ESI):  $m/z$  calcd for  $C_{29}H_{23}N_3O_3Na^+$   $[M+Na]^+$ : 484.1632, found: 484.1641.

**(E)-3-(3-(1,2-diphenylvinyl)-2-(5-methyl-1,2,4-oxadiazol-3-yl)phenyl)-1-ethylpyrrolidine-2,5-dione (5ab)**

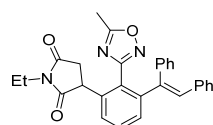

According to general procedure B, purification by column chromatography on silica gel (petroleum ether/ethyl acetate = 2/1, v/v) afforded **5ab** as a white solid (11.3 mg, 49% yield). Melting point: 192.5–194.5 °C;  $^1H$  NMR (400 MHz,  $CDCl_3$ ):  $\delta$  = 7.49 (t,  $J$  = 7.7 Hz, 1H), 7.42 (dd,  $J$  = 7.8, 1.3 Hz, 1H), 7.16 – 7.08 (m, 7H), 7.04 – 6.97 (m, 4H), 6.61 (s, 1H), 4.07 (dd,  $J$  = 9.7, 5.4 Hz, 1H), 3.59 (q,  $J$  = 7.2 Hz, 2H), 3.03 (dd,  $J$  = 18.6, 9.7 Hz, 1H), 2.69 (dd,  $J$  = 18.5, 5.4 Hz, 1H), 2.38 (s, 3H), 1.19 (t,  $J$  = 7.2 Hz, 3H).  $^{13}C$  NMR (100 MHz,  $CDCl_3$ ):  $\delta$  = 177.4, 176.0, 175.8, 167.7, 146.8, 141.5, 139.8, 138.4, 137.2, 131.8, 130.9, 130.5, 130.3, 129.5, 128.1, 128.1, 127.2, 127.1, 126.9, 126.6, 44.1, 38.6, 34.2, 13.2, 12.3. HRMS (ESI):  $m/z$  calcd for  $C_{29}H_{25}N_3O_3Na^+$   $[M+Na]^+$ : 486.1788, found: 486.1803.

**1'-acetyl-1-(tert-butyl)-6',7'-diphenyl-1'H-spiro[pyrrolidine-3,2'-pyrrolo[4,3,2-ij]isoquinoline]-2,5-dione (4ac)**

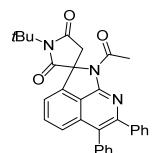

According to general procedure A, purification by column chromatography on silica gel (petroleum ether/ dichloromethane/ethyl acetate = 6/3/1, v/v) afforded **4ac** as a colorless oil (6.4 mg, 26% yield).  $^1H$  NMR (400 MHz,  $CDCl_3$ ):  $\delta$  = 7.70 (dd,  $J$

= 8.4, 7.0 Hz, 1H), 7.55 (d,  $J = 8.3$  Hz, 1H), 7.43 – 7.32 (m, 5H), 7.29 (d,  $J = 7.1$  Hz, 1H), 7.26 – 7.17 (m, 5H), 3.70 (d,  $J = 17.6$  Hz, 1H), 2.99 (d,  $J = 17.7$  Hz, 1H), 2.94 (s, 3H), 1.70 (s, 9H).  $^{13}\text{C}$  NMR (100 MHz,  $\text{CDCl}_3$ ):  $\delta = 174.6, 174.3, 170.2, 156.3, 152.1, 140.7, 139.4, 136.7, 135.3, 133.6, 131.2, 130.7, 128.8, 127.7, 127.6, 127.5, 124.9, 123.9, 121.3, 116.4, 71.7, 59.7, 42.3, 28.4, 25.4$ . HRMS (ESI):  $m/z$  calcd for  $\text{C}_{31}\text{H}_{28}\text{N}_3\text{O}_3^+$   $[\text{M}+\text{H}]^+$ : 490.2125, found: 490.2118.

**(*E*)-1-(*tert*-butyl)-3-(3-(1,2-diphenylvinyl)-2-(5-methyl-1,2,4-oxadiazol-3-yl)phenyl)pyrrolidine-2,5-dione (5ac)**

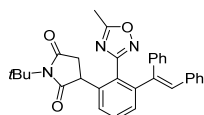

According to general procedure B, purification by column chromatography on silica gel (petroleum ether/ethyl acetate = 2/1, v/v) afforded **5ac** as a colorless oil (14.2 mg, 58% yield).  $^1\text{H}$  NMR (400 MHz,  $\text{CDCl}_3$ ):  $\delta = 7.49$  (t,  $J = 7.7$  Hz, 1H), 7.40 (d,  $J = 6.5$  Hz, 1H), 7.18 – 7.08 (m, 7H), 7.04– 6.97 (m, 4H), 6.60 (s, 1H), 3.93 (dd,  $J = 10.0, 5.7$  Hz, 1H), 2.92 (dd,  $J = 18.2, 10.0$  Hz, 1H), 2.62 (dd,  $J = 18.3, 5.8$  Hz, 1H), 2.38 (s, 3H), 1.59 (s, 9H).  $^{13}\text{C}$  NMR (100 MHz,  $\text{CDCl}_3$ ):  $\delta = 178.5, 177.0, 175.9, 167.7, 146.7, 141.5, 139.8, 139.1, 137.2, 131.7, 130.9, 130.5, 130.1, 129.5, 128.1, 128.0, 127.2, 127.1, 127.0, 126.3, 58.9, 44.0, 38.9, 28.5, 12.3$ . HRMS (ESI):  $m/z$  calcd for  $\text{C}_{31}\text{H}_{30}\text{N}_3\text{O}_3^+$   $[\text{M}+\text{H}]^+$ : 492.2282, found: 492.2286.

**1'-acetyl-1-hexyl-6',7'-diphenyl-1'*H*-spiro[pyrrolidine-3,2'-pyrrolo[4,3,2-*ij*]isoquinoline]-2,5-dione (4ad)**

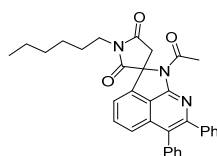

According to general procedure A, purification by column chromatography on silica gel (petroleum ether/ dichloromethane/ethyl acetate = 6/3/1, v/v) afforded **4ad** as colorless oil (6.2 mg, 24% yield).  $^1\text{H}$  NMR (400 MHz,  $\text{CDCl}_3$ ):  $\delta = 7.70$  (dd,  $J = 8.4, 7.0$  Hz, 1H), 7.56 (d,  $J = 8.3$  Hz, 1H), 7.43 – 7.31 (m, 5H), 7.29 – 7.18 (m, 6H), 3.77 (d,  $J = 17.9$  Hz, 1H), 3.71 (t,  $J = 7.5$  Hz, 2H), 3.08 (d,  $J = 17.9$  Hz, 1H), 2.94 (s, 3H), 1.80 – 1.68 (m, 2H), 1.45 – 1.31 (m, 6H), 0.94 – 0.87 (m, 3H).  $^{13}\text{C}$  NMR (100 MHz,  $\text{CDCl}_3$ ):  $\delta = 173.7, 173.7, 170.2, 156.1, 152.1, 140.6, 138.9, 136.7, 135.3, 133.6, 130.7, 128.8, 127.8, 127.6, 127.5, 125.0, 124.0, 121.3, 116.7, 71.9, 42.3, 40.0, 31.4, 27.6, 26.6, 25.3, 22.7, 14.2$ . HRMS (ESI):  $m/z$  calcd for  $\text{C}_{33}\text{H}_{32}\text{N}_3\text{O}_3^+$   $[\text{M}+\text{H}]^+$ : 518.2438, found: 518.2440.

**(*E*)-3-(3-(1,2-diphenylvinyl)-2-(5-methyl-1,2,4-oxadiazol-3-yl)phenyl)-1-hexylpyrrolidine-2,5-dione (5ad)**

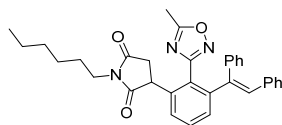

According to general procedure B, purification by column chromatography on silica gel (petroleum ether/ethyl acetate = 2/1, v/v) afforded **5ad** as colorless oil (11.7 mg, 45% yield).  $^1\text{H}$  NMR (400 MHz,  $\text{CDCl}_3$ ):  $\delta = 7.48$  (t,  $J = 7.8$  Hz, 1H), 7.42 (dd,  $J = 7.8, 1.4$  Hz, 1H), 7.17 – 7.08 (m, 7H), 7.04 – 6.96 (m, 4H), 6.61 (s, 1H), 4.08 (dd,  $J = 9.7, 5.4$  Hz, 1H), 3.52 (t,  $J = 7.5$  Hz, 2H), 3.02 (dd,  $J = 18.5, 9.7$  Hz, 1H), 2.68 (dd,  $J = 18.5, 5.4$  Hz, 1H), 2.38 (s, 3H), 1.62 – 1.54 (m, 2H), 1.34 – 1.27 (m, 6H), 0.91 – 0.85 (m, 3H).  $^{13}\text{C}$  NMR (100 MHz,  $\text{CDCl}_3$ ):  $\delta = 177.5, 176.0, 176.0, 167.7, 146.8, 141.5, 139.8, 138.4, 137.2, 131.7, 130.9, 130.5, 130.3, 129.5, 128.1, 128.1, 127.2, 127.1, 127.0, 126.5, 44.0, 39.3, 38.5, 31.4, 27.8, 26.7, 22.6, 14.1, 12.3$ . HRMS (ESI):  $m/z$  calcd for  $\text{C}_{33}\text{H}_{33}\text{N}_3\text{O}_3\text{Na}^+$   $[\text{M}+\text{Na}]^+$ : 542.2414, found: 542.2419.

**1'-acetyl-1,6',7'-triphenyl-1'*H*-spiro[pyrrolidine-3,2'-pyrrolo[4,3,2-*ij*]isoquinoline]-2,5-dione (4ae)**

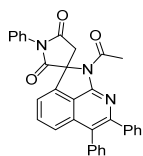

According to general procedure A, purification by column chromatography on silica gel (petroleum ether/ dichloromethane/ethyl acetate = 6/3/1, v/v) afforded **4ae** as a white solid (9.4 mg, 37% yield). Melting point: 283.1–284.9 °C; <sup>1</sup>H NMR (400 MHz, CDCl<sub>3</sub>): δ = 7.75 (dd, *J* = 8.4, 7.0 Hz, 1H), 7.61 (d, *J* = 8.3 Hz, 1H), 7.54 (t, *J* = 7.5 Hz, 2H), 7.50 – 7.32 (m, 9H), 7.30 – 7.19 (m, 5H), 3.93 (d, *J* = 18.1 Hz, 1H), 3.29 (d, *J* = 18.1 Hz, 1H), 2.99 (s, 3H). <sup>13</sup>C NMR (100 MHz, CDCl<sub>3</sub>): δ = 172.8, 170.4, 156.0, 152.2, 140.6, 138.7, 136.6, 135.4, 133.7, 132.1, 131.2, 131.0, 130.7, 129.5, 129.2, 128.8, 128.7, 127.8, 127.6, 127.6, 126.9, 125.2, 124.2, 121.4, 117.0, 71.9, 42.5, 25.2. HRMS (ESI): *m/z* calcd for C<sub>33</sub>H<sub>24</sub>N<sub>3</sub>O<sub>3</sub><sup>+</sup> [M+H]<sup>+</sup>: 510.1812, found: 510.1817.

**(*E*)-3-(3-(1,2-diphenylvinyl)-2-(5-methyl-1,2,4-oxadiazol-3-yl)phenyl)-1-phenylpyrrolidine-2,5-dione (5ae)**

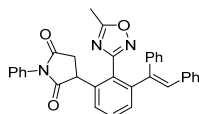

According to general procedure B, purification by column chromatography on silica gel (petroleum ether/ethyl acetate = 2/1, v/v) afforded **5ae** as a colorless oil (12.0 mg, 47% yield). <sup>1</sup>H NMR (400 MHz, CDCl<sub>3</sub>): δ = 7.56 – 7.43 (m, 4H), 7.39 (t, *J* = 7.4 Hz, 1H), 7.36 – 7.28 (m, 3H), 7.20 – 7.08 (m, 6H), 7.07 – 6.98 (m, 4H), 6.63 (s, 1H), 4.30 (dd, *J* = 9.9, 5.9 Hz, 1H), 3.22 (dd, *J* = 18.6, 9.9 Hz, 1H), 2.90 (dd, *J* = 18.6, 5.9 Hz, 1H), 2.37 (s, 3H). <sup>13</sup>C NMR (100 MHz, CDCl<sub>3</sub>): δ = 176.4, 176.1, 174.9, 167.7, 147.0, 141.4, 139.7, 138.0, 137.2, 132.0, 131.8, 130.9, 130.5, 129.4, 129.2, 128.7, 128.1, 128.1, 127.4, 127.2, 127.1, 126.8, 126.5, 44.7, 38.4, 12.2. HRMS (ESI): *m/z* calcd for C<sub>33</sub>H<sub>25</sub>N<sub>3</sub>O<sub>3</sub>Na<sup>+</sup> [M+Na]<sup>+</sup>: 534.1788, found: 534.1783.

**1'-acetyl-6',7'-diphenyl-1-(*p*-tolyl)-1'*H*-spiro[pyrrolidine-3,2'-pyrrolo[4,3,2-*ij*]isoquinoline]-2,5-dione (4af)**

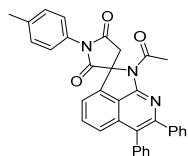

According to general procedure A, purification by column chromatography on silica gel (petroleum ether/ dichloromethane/ethyl acetate = 6/3/1, v/v) afforded **4af** as a colorless oil (7.8 mg, 30% yield). <sup>1</sup>H NMR (400 MHz, CDCl<sub>3</sub>): δ = 7.75 (dd, *J* = 8.4, 7.0 Hz, 1H), 7.60 (d, *J* = 7.8 Hz, 1H), 7.47 – 7.31 (m, 10H), 7.29 – 7.18 (m, 5H), 3.91 (d, *J* = 18.1 Hz, 1H), 3.27 (d, *J* = 18.1 Hz, 1H), 2.98 (s, 3H), 2.41 (s, 3H). <sup>13</sup>C NMR (100 MHz, CDCl<sub>3</sub>): δ = 173.0, 172.9, 170.4, 156.0, 152.2, 140.6, 139.4, 138.8, 136.6, 135.4, 133.7, 131.1, 130.7, 130.1, 129.4, 128.7, 127.8, 127.6, 127.6, 126.7, 125.1, 124.2, 121.4, 116.9, 71.9, 42.5, 25.3, 21.4. HRMS (ESI): *m/z* calcd for C<sub>34</sub>H<sub>26</sub>N<sub>3</sub>O<sub>3</sub><sup>+</sup> [M+H]<sup>+</sup>: 524.1969, found: 524.1964.

**(*E*)-3-(3-(1,2-diphenylvinyl)-2-(5-methyl-1,2,4-oxadiazol-3-yl)phenyl)-1-(*p*-tolyl)pyrrolidine-2,5-dione (5af)**

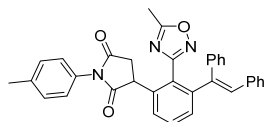

According to general procedure B, purification by column chromatography on silica gel (petroleum ether/ethyl acetate = 2/1, v/v) afforded **5af** as a colorless oil (14.4 mg, 55% yield). <sup>1</sup>H NMR (400 MHz, CDCl<sub>3</sub>): δ = 7.52 (t, *J* = 7.7 Hz, 1H), 7.44 (dd, *J* = 7.8, 1.4 Hz, 1H), 7.33 – 7.24 (m, 3H), 7.21 – 7.09 (m, 8H), 7.06 – 6.98 (m, 4H), 6.62 (s, 1H), 4.28 (dd, *J* = 9.8, 5.8 Hz, 1H), 3.20 (dd, *J* = 18.6, 9.8 Hz, 1H), 2.88 (dd, *J* = 18.6, 5.7 Hz, 1H), 2.37 (d, *J* = 6.1 Hz, 6H). <sup>13</sup>C NMR (100 MHz, CDCl<sub>3</sub>): δ = 176.5, 176.1, 175.0, 167.7, 147.0, 141.4, 139.7, 138.8, 138.1, 137.2, 131.8, 130.9, 130.5, 130.4, 129.9, 129.4, 129.4, 128.1, 128.0, 127.3, 127.2, 127.1, 126.8, 126.3,

44.6, 38.4, 21.3, 12.2. HRMS (ESI):  $m/z$  calcd for  $C_{34}H_{28}N_3O_3^+$   $[M+H]^+$ : 526.2125, found: 526.2123.

**1'-acetyl-1-(4-fluorophenyl)-6',7'-diphenyl-1'H-spiro[pyrrolidine-3,2'-pyrrolo[4,3,2-*ij*]isoquinoline]-2,5-dione (4ag)**

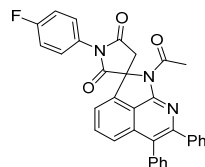

According to general procedure A, purification by column chromatography on silica gel (petroleum ether/ dichloromethane/ethyl acetate = 6/3/1, v/v) afforded **4ag** as a white solid (7.4 mg, 28% yield). Melting point: 240.3–242.8 °C;  $^1H$  NMR (400 MHz,  $CDCl_3$ ):  $\delta$  = 7.75 (t,  $J$  = 7.7 Hz, 1H), 7.61 (d,  $J$  = 8.3 Hz, 1H), 7.49 – 7.32 (m, 8H), 7.29 – 7.17 (m, 7H), 3.90 (d,  $J$  = 18.1 Hz, 1H), 3.29 (d,  $J$  = 18.2 Hz, 1H), 2.98 (s, 3H).  $^{13}C$  NMR (100 MHz,  $CDCl_3$ ):  $\delta$  = 172.9, 172.8, 170.5, 162.7 ( $J$  = 247.6 Hz), 155.9, 152.2, 140.5, 138.5, 136.6, 135.4, 133.7, 131.1, 130.7, 128.8 ( $J$  = 8.8 Hz), 127.9 (d,  $J$  = 3.1 Hz), 127.8, 127.6 ( $J$  = 7 Hz), 125.2, 124.3, 121.4, 117.0, 116.5 ( $J$  = 23.0 Hz), 71.8, 42.5, 25.2.  $^{19}F$  NMR (376 MHz,  $CDCl_3$ ):  $\delta$  = -111.6. (ESI):  $m/z$  calcd for  $C_{33}H_{22}FN_3O_3Na^+$   $[M+Na]^+$ : 550.1537, found: 550.1536.

**(*E*)-3-(3-(1,2-diphenylvinyl)-2-(5-methyl-1,2,4-oxadiazol-3-yl)phenyl)-1-(4-fluorophenyl)pyrrolidine-2,5-dione (5ag)**

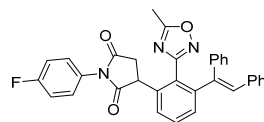

According to general procedure B, purification by column chromatography on silica gel (petroleum ether/ethyl acetate = 2/1, v/v) afforded **5ag** as a colorless oil (15.9 mg, 60% yield).  $^1H$  NMR (400 MHz,  $CDCl_3$ ):  $\delta$  = 7.52 (t,  $J$  = 7.7 Hz, 1H), 7.46 (dd,  $J$  = 7.8, 1.5 Hz, 1H), 7.35 – 7.28 (m, 3H), 7.20 – 7.10 (m, 8H), 7.07 – 6.99 (m, 4H), 6.62 (s, 1H), 4.30 (dd,  $J$  = 10.0, 5.8 Hz, 1H), 3.22 (dd,  $J$  = 18.6, 9.9 Hz, 1H), 2.89 (dd,  $J$  = 18.7, 5.9 Hz, 1H), 2.36 (s, 3H).  $^{13}C$  NMR (100 MHz,  $CDCl_3$ ):  $\delta$  = 176.3, 176.2, 174.8, 167.7, 162.3 ( $J$  = 247.1 Hz), 147.1, 141.4, 139.7, 137.7, 137.1, 131.9, 130.7 ( $J$  = 34.8 Hz), 130.5, 129.4, 128.3 ( $J$  = 8.7 Hz), 128.1 ( $J$  = 4.4 Hz), 127.9 ( $J$  = 3.2 Hz), 127.5, 127.2 ( $J$  = 14.1 Hz), 126.7, 116.2 ( $J$  = 22.8 Hz), 44.7, 38.3, 12.2.  $^{19}F$  NMR (376 MHz,  $CDCl_3$ ):  $\delta$  = -112.2. HRMS (ESI):  $m/z$  calcd for  $C_{33}H_{24}FN_3O_3Na^+$   $[M+Na]^+$ : 552.1694, found: 552.1698.

**1'-acetyl-6',7'-diphenyl-1-(*o*-tolyl)-1'H-spiro[pyrrolidine-3,2'-pyrrolo[4,3,2-*ij*]isoquinoline]-2,5-dione (4ah)**

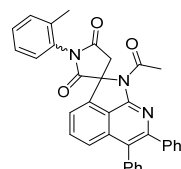

According to general procedure A, purification by column chromatography on silica gel (petroleum ether/ dichloromethane/ethyl acetate = 6/3/1, v/v) afforded **4ah** (rotameric products = 1:1.2 and cannot be separated) as a colorless oil (5.5 mg, 21% yield).  $^1H$  NMR (400 MHz,  $CDCl_3$ ):  $\delta$  = 7.77 (dd,  $J$  = 8.4, 7.1 Hz, 1H), 7.61 (d,  $J$  = 8.3 Hz, 1H), 7.51 – 7.29 (m, 10H), 7.29 – 7.19 (m, 5H), 4.00 (dd,  $J$  = 61.3, 18.0 Hz, 1H), 3.29 (dd,  $J$  = 29.6, 18.0 Hz, 1H), 2.99 (d,  $J$  = 3.9 Hz, 3H), 2.39 (d,  $J$  = 47.7 Hz, 3H).  $^{13}C$  NMR (100 MHz,  $CDCl_3$ ):  $\delta$  = 172.8, 172.7, 172.6, 172.6, 170.5, 170.2, 156.1, 156.0, 152.2, 140.6, 139.0, 138.8, 137.5, 136.6, 135.5, 135.4, 135.3, 133.7, 133.7, 131.8, 131.2, 131.1, 130.9, 130.7, 130.1, 130.0, 128.8, 128.4, 127.9, 127.8, 127.7, 127.6, 127.5, 126.9, 125.2, 125.1, 124.2, 124.2, 121.5, 121.2, 116.9, 116.6, 72.2, 72.1, 42.8, 42.3, 25.3, 25.3, 18.0, 18.0. HRMS (ESI):  $m/z$  calcd for  $C_{34}H_{25}N_3O_3Na^+$   $[M+Na]^+$ : 546.1788, found: 546.1789.

**(E)-3-(3-(1,2-diphenylvinyl)-2-(5-methyl-1,2,4-oxadiazol-3-yl)phenyl)-1-(*o*-tolyl)pyrrolidine-2,5-dione (5ah)**

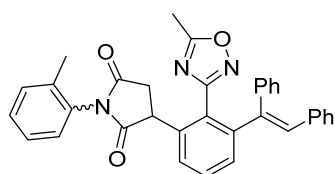

According to general procedure B, purification by column chromatography on silica gel (petroleum ether/ethyl acetate = 2/1, v/v) afforded **5ah** (rotameric products = 1:1.0 and cannot be separated) as a colorless oil (14.7 mg, 56% yield). <sup>1</sup>H NMR (400 MHz, CDCl<sub>3</sub>): δ = 7.54 (td, *J* = 7.8, 5.5 Hz, 1H), 7.46 (t, *J* = 6.3 Hz, 1H), 7.38 – 7.27 (m, 4H), 7.19 – 6.97 (m, 11H), 6.63 (d, *J* = 13.1 Hz, 1H), 4.34 (td, *J* = 9.5, 5.7 Hz, 1H), 3.25 (dd, *J* = 19.5, 10.6 Hz, 1H), 2.95 – 2.84 (m, 1H), 2.41 (d, *J* = 6.5 Hz, 3H), 2.20 (d, *J* = 56.9 Hz, 3H). <sup>13</sup>C NMR (100 MHz, CDCl<sub>3</sub>): δ = 176.4, 176.3, 176.2, 176.1, 174.9, 174.9, 167.8, 167.7, 147.0, 146.9, 141.5, 141.5, 139.8, 139.7, 138.4, 138.0, 137.2, 137.2, 135.7, 135.6, 131.8, 131.4, 131.3, 131.2, 131.2, 131.1, 131.0, 130.6, 130.5, 130.4, 129.8, 129.7, 129.5, 129.5, 128.1, 128.1, 127.3, 127.3, 127.3, 127.2, 127.1, 127.1, 127.1, 125.8, 44.8, 44.2, 38.9, 38.7, 18.2, 18.0, 12.3. HRMS (ESI): *m/z* calcd for C<sub>34</sub>H<sub>28</sub>N<sub>3</sub>O<sub>3</sub><sup>+</sup> [M+H]<sup>+</sup>: 526.2125, found: 526.2129.

**1'-acetyl-1-(3-chloro-4-fluorophenyl)-6',7'-diphenyl-1'*H*-spiro[pyrrolidine-3,2'-pyrrolo[4,3,2-*ij*]isoquinoline]-2,5-dione (4ai)**

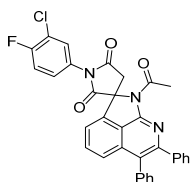

According to general procedure A, purification by column chromatography on silica gel (petroleum ether/ dichloromethane/ethyl acetate = 6/3/1, v/v) afforded **4ai** as a white solid (7.6 mg, 27% yield). Melting point: 251.2–252.3 °C; <sup>1</sup>H NMR (400 MHz, CDCl<sub>3</sub>): δ = 7.75 (dd, *J* = 8.4, 7.0 Hz, 1H), 7.61 (d, *J* = 8.3 Hz, 1H), 7.56 (dd, *J* = 6.4, 2.5 Hz, 1H), 7.45 – 7.33 (m, 7H), 7.29 (d, *J* = 8.6 Hz, 1H), 7.26 – 7.18 (m, 5H), 3.88 (d, *J* = 18.2 Hz, 1H), 3.28 (d, *J* = 18.2 Hz, 1H), 2.97 (s, 3H). <sup>13</sup>C NMR (100 MHz, CDCl<sub>3</sub>): δ = 172.6, 172.4, 170.6, 158.3 (*J* = 250.3 Hz), 155.8, 152.3, 140.5, 138.3, 136.5, 135.4, 133.7, 131.0, 130.7, 129.4, 128.8, 128.4 (*J* = 3.8 Hz), 127.8, 127.7 (*J* = 7.2 Hz), 127.0 (*J* = 7.8 Hz), 125.3, 124.4, 122.0 (*J* = 18.9 Hz), 121.3, 117.3 (*J* = 22.4 Hz), 117.0, 71.7, 42.5, 25.2. <sup>19</sup>F NMR (376 MHz, CDCl<sub>3</sub>): δ = -113.7. HRMS (ESI): *m/z* calcd for C<sub>33</sub>H<sub>22</sub>ClFN<sub>3</sub>O<sub>3</sub><sup>+</sup> [M+H]<sup>+</sup>: 562.1328, found: 562.1321.

**(E)-1-(3-chloro-4-fluorophenyl)-3-(3-(1,2-diphenylvinyl)-2-(5-methyl-1,2,4-oxadiazol-3-yl)phenyl)pyrrolidine-2,5-dione (5ai)**

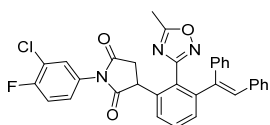

According to general procedure B, purification by column chromatography on silica gel (petroleum ether/ethyl acetate = 2/1, v/v) afforded **5ai** as a colorless oil (17.7 mg, 63% yield). <sup>1</sup>H NMR (400 MHz, CDCl<sub>3</sub>): δ = 7.53 (t, *J* = 7.7 Hz, 1H), 7.49 – 7.41 (m, 2H), 7.31 – 7.22 (m, 3H), 7.17 – 7.09 (m, 6H), 7.05 – 6.98 (m, 4H), 6.61 (s, 1H), 4.30 (dd, *J* = 10.0, 5.9 Hz, 1H), 3.22 (dd, *J* = 18.7, 9.9 Hz, 1H), 2.91 (dd, *J* = 18.7, 5.9 Hz, 1H), 2.36 (s, 3H). <sup>13</sup>C NMR (100 MHz, CDCl<sub>3</sub>): δ = 176.3, 176.0, 174.4, 167.8, 157.8 (*J* = 249.9 Hz), 147.2, 141.3, 139.7, 137.3 (*J* = 28.4 Hz), 131.9, 130.8 (*J* = 23.9 Hz), 130.5, 129.5, 128.9, 128.4 (*J* = 3.8 Hz), 128.1 (*J* = 4.3 Hz), 127.8, 127.2 (*J* = 14.4 Hz), 126.6, 126.4 (*J* = 7.6 Hz), 121.8 (*J* = 18.9 Hz), 117.1 (*J* = 22.3 Hz), 44.8, 38.2, 12.2. <sup>19</sup>F NMR (376 MHz, CDCl<sub>3</sub>): δ = -114.4. HRMS (ESI): *m/z* calcd for C<sub>33</sub>H<sub>23</sub>ClFN<sub>3</sub>O<sub>3</sub>Na<sup>+</sup> [M+Na]<sup>+</sup>: 586.1304, found: 586.1310.

**1'-acetyl-1-methyl-6',7'-di-*p*-tolyl-1'*H*-spiro[pyrrolidine-3,2'-pyrrolo[4,3,2-*ij*]isoquinoline]-2,**

### 5-dione (4aj)

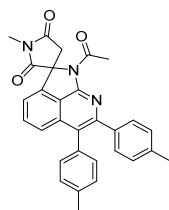

According to general procedure A, purification by column chromatography on silica gel (petroleum ether/ dichloromethane/ethyl acetate = 6/3/1, v/v) afforded **4aj** as a white solid (10.2 mg, 43% yield). Melting point: 230.1–233.5 °C; <sup>1</sup>H NMR (400 MHz, CDCl<sub>3</sub>): δ = 7.66 (dd, *J* = 8.3, 7.1 Hz, 1H), 7.54 (d, *J* = 8.2 Hz, 1H), 7.30 (d, *J* = 8.2 Hz, 2H), 7.24 (s, 1H), 7.17 (d, *J* = 8.3 Hz, 2H), 7.14 – 7.07 (m, 2H) 7.02 (d, *J* = 7.9 Hz, 2H), 3.73 (d, *J* = 18.0 Hz, 1H), 3.21 (s, 3H), 3.09 (d, *J* = 18.0 Hz, 1H), 2.92 (s, 3H), 2.34 (d, *J* = 32.9 Hz, 6H). <sup>13</sup>C NMR (100 MHz, CDCl<sub>3</sub>): δ = 173.9, 173.8, 170.3, 155.8, 152.0, 138.6, 137.9, 137.4, 137.2, 135.6, 133.7, 133.4, 130.9, 130.6, 129.5, 128.5, 124.8, 124.1, 121.2, 116.7, 71.9, 42.4, 25.9, 25.3, 21.5, 21.4. HRMS (ESI): *m/z* calcd for C<sub>30</sub>H<sub>25</sub>N<sub>3</sub>O<sub>3</sub>Na<sup>+</sup> [M+Na]<sup>+</sup>: 498.1788, found: 498.1790.

### (E)-3-(3-(1,2-di-p-tolylvinyl)-2-(5-methyl-1,2,4-oxadiazol-3-yl)phenyl)-1-methylpyrrolidine-2,5-dione (5aj)

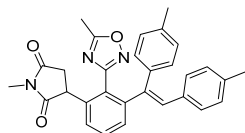

According to general procedure B, purification by column chromatography on silica gel (petroleum ether/ethyl acetate = 2/1, v/v) afforded **5aj** as a colorless oil (9.8 mg, 41% yield). <sup>1</sup>H NMR (400 MHz, CDCl<sub>3</sub>): δ = 7.46 (t, *J* = 7.8 Hz, 1H), 7.39 (dd, *J* = 7.8, 1.3 Hz, 1H), 7.14 (dd, *J* = 7.7, 1.3 Hz, 1H), 6.99 – 6.86 (m, 8H), 6.52 (s, 1H), 4.09 (dd, *J* = 9.6, 5.4 Hz, 1H), 3.09 – 2.98 (m, 4H), 2.70 (dd, *J* = 18.5, 5.5 Hz, 1H), 2.38 (s, 3H), 2.27 (t, *J* = 14.1 Hz, 6H). <sup>13</sup>C NMR (100 MHz, CDCl<sub>3</sub>): δ = 177.6, 176.1, 175.9, 167.7, 147.3, 140.5, 138.0, 137.0, 136.8, 136.8, 134.4, 131.4, 130.8, 130.3, 130.3, 129.3, 128.8, 128.7, 126.8, 126.6, 44.3, 38.5, 25.3, 21.4, 21.3, 12.2. HRMS (ESI): *m/z* calcd for C<sub>30</sub>H<sub>27</sub>N<sub>3</sub>O<sub>3</sub>Na<sup>+</sup> [M+Na]<sup>+</sup>: 500.1945, found: 500.1954.

### 1'-acetyl-6',7'-bis(4-methoxyphenyl)-1-methyl-1'H-spiro[pyrrolidine-3,2'-pyrrolo[4,3,2-ij]isoquinoline]-2,5-dione (4ak)

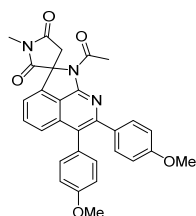

According to general procedure A, purification by column chromatography on silica gel (petroleum ether/ dichloromethane/ethyl acetate = 6/3/1) afforded **4ak** as a white solid (14.7 mg, 58% yield). Melting point: 218.5–219.1 °C; <sup>1</sup>H NMR (400 MHz, CDCl<sub>3</sub>): δ = 7.69 (dd, *J* = 8.4, 7.0 Hz, 1H), 7.57 (d, *J* = 8.2 Hz, 1H), 7.38 (d, *J* = 8.9 Hz, 2H), 7.27 (d, *J* = 2.1 Hz, 1H), 7.17 (d, *J* = 7.5 Hz, 2H), 6.94 (d, *J* = 8.9 Hz, 2H), 6.78 (d, *J* = 8.9 Hz, 2H), 3.87 (s, 3H), 3.80 (s, 3H), 3.76 (d, *J* = 17.9 Hz, 1H), 3.24 (s, 3H), 3.11 (d, *J* = 18.0 Hz, 1H), 2.95 (s, 3H). <sup>13</sup>C NMR (100 MHz, CDCl<sub>3</sub>): δ = 173.9, 173.8, 170.3, 159.1, 159.0, 155.7, 151.7, 138.6, 135.7, 133.5, 133.2, 132.0, 129.0, 124.0, 124.0, 121.1, 116.6, 114.3, 113.3, 71.9, 55.4, 55.3, 42.4, 25.9, 25.3. HRMS (ESI): *m/z* calcd for C<sub>30</sub>H<sub>26</sub>N<sub>3</sub>O<sub>5</sub><sup>+</sup> [M+H]<sup>+</sup>: 508.1867, found: 508.1863.

### (E)-3-(3-(1,2-bis(4-methoxyphenyl)vinyl)-2-(5-methyl-1,2,4-oxadiazol-3-yl)phenyl)-1-methylpyrrolidine-2,5-dione (5ak)

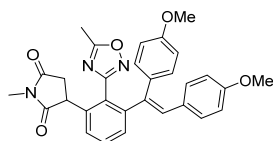

According to general procedure B, purification by column chromatography on silica gel (petroleum ether/ethyl acetate = 2/1, v/v) afforded **5ak** as a colorless oil (6.6 mg, 26% yield). <sup>1</sup>H NMR (400 MHz, CDCl<sub>3</sub>): δ = 7.46 (t, *J* = 7.7 Hz, 1H), 7.39 (dd, *J* = 7.8, 1.4 Hz, 1H), 7.14 (dd, *J* = 7.8, 1.3 Hz, 1H), 6.94 (t, *J* = 8.3 Hz, 4H), 6.66 (t, *J* = 9.0 Hz, 4H), 6.47 (s, 1H), 4.10 (dd, *J*



= 9.7, 5.5 Hz, 1H), 3.76 (d,  $J$  = 11.1 Hz, 6H), 3.08 – 2.98 (m, 4H), 2.70 (dd,  $J$  = 18.5, 5.5 Hz, 1H), 2.39 (s, 3H).  $^{13}\text{C}$  NMR (100 MHz,  $\text{CDCl}_3$ ):  $\delta$  = 177.7, 176.1, 176.0, 167.7, 158.7, 158.6, 147.4, 139.2, 138.0, 132.5, 132.4, 131.7, 130.8, 130.7, 130.7, 130.3, 130.0, 126.8, 126.6, 113.5, 113.5, 55.3, 44.3, 38.5, 25.3, 12.2. HRMS (ESI):  $m/z$  calcd for  $\text{C}_{30}\text{H}_{27}\text{N}_3\text{O}_5\text{Na}^+$  [ $\text{M}+\text{Na}$ ] $^+$ : 532.1843, found: 532.1850.

#### 1'-acetyl-6',7'-bis(4-fluorophenyl)-1-methyl-1'*H*-spiro[pyrrolidine-3,2'-pyrrolo[4,3,2-*ij*]isoquinoline]-2,5-dione (4a)

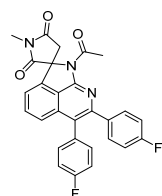

According to general procedure A, purification by column chromatography on silica gel (petroleum ether/ dichloromethane/ethyl acetate = 6/3/1, v/v) afforded **4a** as a colorless oil (9.4 mg, 39% yield).  $^1\text{H}$  NMR (400 MHz,  $\text{CDCl}_3$ ):  $\delta$  = 7.73 (dd,  $J$  = 8.3, 7.1 Hz, 1H), 7.53 (d,  $J$  = 8.3 Hz, 1H), 7.40 – 7.29 (m, 3H), 7.19 (s, 2H), 7.09 (t,  $J$  = 8.8 Hz, 2H), 6.97 – 6.89 (m, 2H), 3.75 (d,  $J$  = 18.0 Hz, 1H), 3.23 (s, 3H), 3.11 (d,  $J$  = 18.0 Hz, 1H), 2.92 (s, 3H).  $^{13}\text{C}$  NMR (100 MHz,  $\text{CDCl}_3$ ):  $\delta$  = 173.8, 173.7, 170.2, 162.3 ( $J$  = 245.2 Hz), 156.2, 151.3, 138.8, 136.5 ( $J$  = 3.2 Hz), 135.2, 133.9, 132.6, 132.4 ( $J$  = 7.8 Hz), 123.9, 123.7, 121.3, 117.2, 116.2, 115.9, 114.9 ( $J$  = 21.4 Hz), 72.0, 42.4, 25.9, 25.3.  $^{19}\text{F}$  NMR (376 MHz,  $\text{CDCl}_3$ ):  $\delta$  = -113.9, -114.0. HRMS (ESI):  $m/z$  calcd for  $\text{C}_{28}\text{H}_{20}\text{F}_2\text{N}_3\text{O}_3^+$  [ $\text{M}+\text{H}$ ] $^+$ : 484.1467, found: 484.1466.

#### (*E*)-3-(3-(1,2-bis(4-fluorophenyl)vinyl)-2-(5-methyl-1,2,4-oxadiazol-3-yl)phenyl)-1-methylpyrrolidine-2,5-dione (5a)

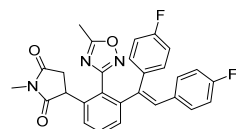

According to general procedure B, purification by column chromatography on silica gel (petroleum ether/ethyl acetate = 2/1, v/v) afforded **5a** as a colorless oil (11.6 mg, 48% yield).  $^1\text{H}$  NMR (400 MHz,  $\text{CDCl}_3$ ):  $\delta$  = 7.49 (t,  $J$  = 7.8 Hz, 1H), 7.38 (d,  $J$  = 6.6 Hz, 1H), 7.18 (d,  $J$  = 7.8 Hz, 1H), 7.01 – 6.90 (m, 4H), 6.82 (q,  $J$  = 8.6 Hz, 4H), 6.54 (s, 1H), 4.11 (dd,  $J$  = 9.7, 5.5 Hz, 1H), 3.11 – 2.97 (m, 4H), 2.70 (dd,  $J$  = 18.4, 5.6 Hz, 1H), 2.41 (s, 3H).  $^{13}\text{C}$  NMR (100 MHz,  $\text{CDCl}_3$ ):  $\delta$  = 177.6, 176.2, 175.9, 167.6, 163.2 ( $J$  = 21.5 Hz), 160.7 ( $J$  = 21.6 Hz), 146.4, 140.3 ( $J$  = 1.5 Hz), 138.2, 135.5 ( $J$  = 3.4 Hz), 133.0 ( $J$  = 3.4 Hz), 132.2 ( $J$  = 7.9 Hz), 131.1, 131.0 ( $J$  = 2.5 Hz), 130.8, 130.2, 127.2, 126.8, 115.3 ( $J$  = 6.9 Hz), 115.1 ( $J$  = 7.1 Hz), 44.3, 38.4, 25.3, 12.2.  $^{19}\text{F}$  NMR (376 MHz,  $\text{CDCl}_3$ ):  $\delta$  = -114.1. HRMS (ESI):  $m/z$  calcd for  $\text{C}_{28}\text{H}_{21}\text{F}_2\text{N}_3\text{O}_3\text{Na}^+$  [ $\text{M}+\text{Na}$ ] $^+$ : 508.1443, found: 508.1440.

#### 1'-acetyl-6',7'-bis(3-methoxyphenyl)-1-methyl-1'*H*-spiro[pyrrolidine-3,2'-pyrrolo[4,3,2-*ij*]isoquinoline]-2,5-dione (4am)

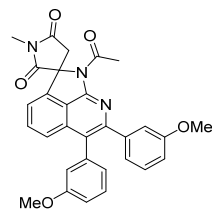

According to general procedure A, purification by column chromatography on silica gel (petroleum ether/ dichloromethane/ethyl acetate = 6/3/1, v/v) afforded **4am** as a white solid (10.1 mg, 40% yield). Melting point: 218.2–220.4 °C;  $^1\text{H}$  NMR (400 MHz,  $\text{CDCl}_3$ ):  $\delta$  = 7.71 (dd,  $J$  = 8.4, 7.0 Hz, 1H), 7.60 (d,  $J$  = 8.3 Hz, 1H), 7.34 – 7.27 (m, 2H), 7.15 (t,  $J$  = 7.9 Hz, 1H), 7.05 (d,  $J$  = 7.8 Hz, 1H), 7.01 – 6.95 (m, 1H), 6.92 – 6.73 (m, 4H), 3.81 – 3.68 (m, 4H), 3.63 (s, 3H), 3.23 (s, 3H), 3.11 (d,  $J$  = 18.0 Hz, 1H), 2.94 (s, 3H).  $^{13}\text{C}$  NMR (100 MHz,  $\text{CDCl}_3$ ):  $\delta$  = 173.9, 173.8, 170.3, 159.0, 156.0, 151.8, 141.9, 138.6, 138.1, 135.2, 133.7, 128.8, 125.0, 124.2, 123.1, 121.3, 117.0, 115.7, 114.1, 71.9, 55.4, 55.2, 42.4, 25.9, 25.3. HRMS (ESI):  $m/z$  calcd for  $\text{C}_{30}\text{H}_{26}\text{N}_3\text{O}_5^+$  [ $\text{M}+\text{H}$ ] $^+$ : 508.1867, found: 508.1870.

**(E)-3-(3-(1,2-bis(3-methoxyphenyl)vinyl)-2-(5-methyl-1,2,4-oxadiazol-3-yl)phenyl)-1-methylpyrrolidine-2,5-dione (5am)**

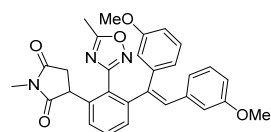

According to general procedure B, purification by column chromatography on silica gel (petroleum ether/ethyl acetate = 2/1, v/v) afforded **5am** as a colorless oil (8.7 mg, 34% yield).  $^1\text{H}$  NMR (400 MHz,  $\text{CDCl}_3$ ):  $\delta$  = 7.52 – 7.40 (m, 2H), 7.16 (d,  $J$  = 6.1 Hz, 1H), 7.05 (dt,  $J$  = 17.7, 7.9 Hz, 2H), 6.68 (ddd,  $J$  = 17.1, 8.3, 2.9 Hz, 2H), 6.62 (d,  $J$  = 7.7 Hz, 2H), 6.59 – 6.52 (m, 3H), 4.09 (dd,  $J$  = 9.7, 5.6 Hz, 1H), 3.58 (d,  $J$  = 29.8 Hz, 6H), 3.01 (s, 4H), 2.70 (dd,  $J$  = 18.5, 5.4 Hz, 1H), 2.40 (s, 3H).  $^{13}\text{C}$  NMR (100 MHz,  $\text{CDCl}_3$ ):  $\delta$  = 177.6, 176.0, 176.0, 167.6, 159.3, 159.1, 146.6, 141.5, 141.1, 138.3, 138.1, 131.8, 130.9, 130.1, 129.2, 129.0, 126.9, 126.8, 122.8, 122.2, 115.5, 114.0, 113.6, 113.3, 55.3, 55.0, 44.3, 38.4, 25.2, 12.1. HRMS (ESI):  $m/z$  calcd for  $\text{C}_{30}\text{H}_{27}\text{N}_3\text{O}_5\text{Na}^+$   $[\text{M}+\text{Na}]^+$ : 532.1843, found: 532.1843.

**1'-acetyl-6',7'-bis(3-chlorophenyl)-1-methyl-1'H-spiro[pyrrolidine-3,2'-pyrrolo[4,3,2-ij]isoquinoline]-2,5-dione (4an)**

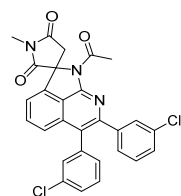

According to general procedure A, purification by column chromatography on silica gel (petroleum ether/ dichloromethane/ethyl acetate = 6/3/1, v/v) afforded **4an** as a colorless oil (6.2 mg, 24% yield).  $^1\text{H}$  NMR (400 MHz,  $\text{CDCl}_3$ ):  $\delta$  = 7.75 (dd,  $J$  = 8.4, 7.1 Hz, 1H), 7.54 (d,  $J$  = 8.3 Hz, 1H), 7.45 (t,  $J$  = 1.9 Hz, 1H), 7.39 – 7.29 (m, 3H), 7.28 – 7.21 (m, 2H), 7.20 – 7.06 (m, 3H), 3.76 (d,  $J$  = 18.0 Hz, 1H), 3.23 (s, 3H), 3.12 (d,  $J$  = 18.2 Hz, 1H), 2.93 (s, 3H).  $^{13}\text{C}$  NMR (100 MHz,  $\text{CDCl}_3$ ):  $\delta$  = 173.6, 170.3, 156.4, 150.9, 142.0, 138.8, 138.1, 134.9, 134.1, 133.9, 130.8, 130.6, 129.4, 129.1, 128.7, 128.1, 128.0, 124.0, 123.8, 121.4, 117.6, 72.0, 42.3, 26.0, 25.4. HRMS (ESI):  $m/z$  calcd for  $\text{C}_{28}\text{H}_{20}\text{Cl}_2\text{N}_3\text{O}_3^+$   $[\text{M}+\text{H}]^+$ : 516.0876, found: 516.0870.

**(E)-3-(3-(1,2-bis(3-chlorophenyl)vinyl)-2-(5-methyl-1,2,4-oxadiazol-3-yl)phenyl)-1-methylpyrrolidine-2,5-dione (5an)**

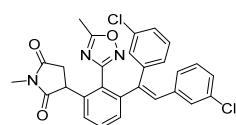

According to general procedure B, purification by column chromatography on silica gel (petroleum ether/ethyl acetate = 2/1, v/v) afforded **5an** as a colorless oil (16.8 mg, 65% yield).  $^1\text{H}$  NMR (400 MHz,  $\text{CDCl}_3$ ):  $\delta$  = 7.50 (t,  $J$  = 7.8 Hz, 1H), 7.39 (dd,  $J$  = 7.8, 1.3 Hz, 1H), 7.21 (dd,  $J$  = 7.8, 1.3 Hz, 1H), 7.17 – 7.01 (m, 4H), 6.97 (d,  $J$  = 12.7 Hz, 2H), 6.88 (d,  $J$  = 7.5 Hz, 1H), 6.83 (d,  $J$  = 7.7 Hz, 1H), 6.56 (s, 1H), 4.12 (dd,  $J$  = 9.6, 5.6 Hz, 1H), 3.02 (s, 4H), 2.70 (dd,  $J$  = 18.5, 5.5 Hz, 1H), 2.44 (s, 3H).  $^{13}\text{C}$  NMR (100 MHz,  $\text{CDCl}_3$ ):  $\delta$  = 177.5, 176.3, 175.9, 167.4, 145.6, 141.5, 141.1, 138.4, 138.3, 134.1, 134.0, 131.1, 131.0, 130.2, 130.2, 129.6, 129.4, 129.4, 128.5, 127.7, 127.5, 127.5, 127.4, 126.8, 44.3, 38.4, 25.3, 12.1. HRMS (ESI):  $m/z$  calcd for  $\text{C}_{28}\text{H}_{22}\text{Cl}_2\text{N}_3\text{O}_3^+$   $[\text{M}+\text{H}]^+$ : 518.1033, found: 518.1019.

**1'-acetyl-6',7'-dibutyl-1-methyl-1'H-spiro[pyrrolidine-3,2'-pyrrolo[4,3,2-ij]isoquinoline]-2,5-dione (4ao)**

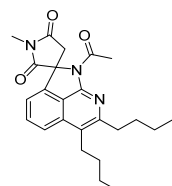

According to general procedure A, purification by column chromatography on silica gel (petroleum ether/ dichloromethane/ethyl acetate = 6/3/1, v/v) afforded **4ao** as a colorless oil (10.0 mg, 49% yield).  $^1\text{H}$  NMR (400 MHz,  $\text{CDCl}_3$ ):  $\delta$  =

7.77 – 7.67 (m, 2H), 7.18 (d,  $J = 6.6$  Hz, 1H), 3.68 (d,  $J = 18.0$  Hz, 1H), 3.19 (s, 3H), 3.02 (d,  $J = 17.9$  Hz, 1H), 2.96 – 2.84 (m, 7H), 1.83 – 1.72 (m, 2H), 1.63 – 1.53 (m, 2H), 1.52 – 1.40 (m, 4H), 0.99 (td,  $J = 7.3, 2.4$  Hz, 6H).  $^{13}\text{C}$  NMR (100 MHz,  $\text{CDCl}_3$ ):  $\delta = 174.0, 173.9, 170.2, 154.8, 154.7, 139.0, 134.9, 132.9, 122.5, 121.9, 121.0, 115.6, 71.5, 42.5, 34.8, 33.0, 32.1, 27.3, 25.8, 25.0, 23.2, 22.9, 14.2, 14.1$ . HRMS (ESI):  $m/z$  calcd for  $\text{C}_{24}\text{H}_{30}\text{N}_3\text{O}_3^+$   $[\text{M}+\text{H}]^+$ : 408.2282, found: 408.2275.

**1'-acetyl-6'-butyl-1-methyl-7'-(naphthalen-2-yl)-1'H-spiro[pyrrolidine-3,2'-pyrrolo[4,3,2-ij]isquinoline]-2,5-dione (4ap)**

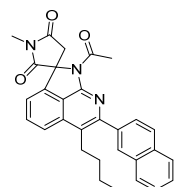

According to general procedure A, purification by column chromatography on silica gel (petroleum ether/ dichloromethane/ethyl acetate = 6/3/1, v/v) afforded **4ap** as a colorless oil (11.7 mg, 49% yield).  $^1\text{H}$  NMR (400 MHz,  $\text{CDCl}_3$ ):  $\delta = 8.02 - 7.86$  (m, 5H), 7.85 – 7.78 (m, 1H), 7.69 (dd,  $J = 8.4, 1.8$  Hz, 1H), 7.58 – 7.51 (m, 2H), 7.32 (d,  $J = 7.0$  Hz, 1H), 3.73 (d,  $J = 18.0$  Hz, 1H), 3.23 (s, 3H), 3.09 (d,  $J = 18.0$  Hz, 1H), 3.01 (dd,  $J = 9.5, 6.7$  Hz, 2H), 2.84 (s, 3H), 1.72 – 1.64 (m, 2H), 1.40 – 1.29 (m, 2H), 0.86 (t,  $J = 7.3$  Hz, 3H).  $^{13}\text{C}$  NMR (100 MHz,  $\text{CDCl}_3$ ):  $\delta = 173.9, 173.8, 170.3, 154.8, 152.8, 139.2, 138.8, 135.1, 133.3, 133.1, 132.9, 128.4, 127.9, 127.8, 126.4, 126.4, 124.2, 122.8, 121.7, 116.7, 71.7, 42.4, 33.4, 28.2, 25.9, 25.1, 23.0, 13.9$ . HRMS (ESI):  $m/z$  calcd for  $\text{C}_{30}\text{H}_{27}\text{N}_3\text{O}_3\text{Na}^+$   $[\text{M}+\text{Na}]^+$ : 500.1945, found: 500.1943.

**(E)-1-methyl-3-(2-(5-methyl-1,2,4-oxadiazol-3-yl)-3-(1-(naphthalen-2-yl)hex-1-en-2-yl)phenyl)pyrrolidine-2,5-dione (5ap)**

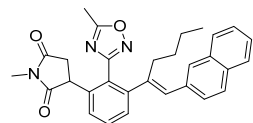

According to general procedure B, purification by column chromatography on silica gel (petroleum ether/ethyl acetate = 2/1, v/v) afforded **5ap** as a colorless oil (7.2 mg, 30% yield).  $^1\text{H}$  NMR (400 MHz,  $\text{CDCl}_3$ ):  $\delta = 7.84 - 7.75$  (m, 3H), 7.60 (s, 1H), 7.54 – 7.39 (m, 4H), 7.30 – 7.26 (m, 1H), 7.17 (d,  $J = 7.7$  Hz, 1H), 6.42 (s, 1H), 4.15 (dd,  $J = 9.7, 5.5$  Hz, 1H), 3.18 – 3.03 (m, 4H), 2.76 (dd,  $J = 18.6, 5.5$  Hz, 1H), 2.59 (s, 3H), 2.52 – 2.35 (m, 2H), 1.47 – 1.36 (m, 2H), 1.26 – 1.21 (m, 2H), 0.83 (t,  $J = 7.3$  Hz, 3H).  $^{13}\text{C}$  NMR (100 MHz,  $\text{CDCl}_3$ ):  $\delta = 177.8, 176.4, 176.1, 167.9, 146.5, 142.6, 138.1, 135.3, 133.4, 132.3, 131.2, 130.7, 128.8, 128.0, 127.8, 127.7, 127.3, 127.1, 126.6, 126.2, 126.2, 125.9, 44.7, 38.6, 32.4, 30.4, 25.3, 23.0, 14.0, 12.5$ . HRMS (ESI):  $m/z$  calcd for  $\text{C}_{30}\text{H}_{29}\text{N}_3\text{O}_3\text{Na}^+$   $[\text{M}+\text{Na}]^+$ : 502.2101, found: 502.2102.

**1'-acetyl-1-methyl-6',7'-di(thiophen-3-yl)-1'H-spiro[pyrrolidine-3,2'-pyrrolo[4,3,2-ij]isoquinoline]-2,5-dione (4aq)**

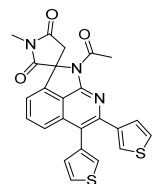

According to general procedure A, purification by column chromatography on silica gel (petroleum ether/ dichloromethane/ethyl acetate = 6/3/1, v/v) afforded **4aq** as a white solid (7.1 mg, 31% yield). Melting point: 181.4–183.0 °C;  $^1\text{H}$  NMR (400 MHz,  $\text{CDCl}_3$ ):  $\delta = 7.69$  (dd,  $J = 8.3, 7.1$  Hz, 1H), 7.56 – 7.47 (m, 2H), 7.30 (dd,  $J = 3.1, 1.3$  Hz, 1H), 7.28 – 7.25 (m, 2H), 7.17 (dd,  $J = 5.1, 3.0$  Hz, 1H), 7.11 (dd,  $J = 5.1, 1.3$  Hz, 1H), 7.00 (dd,  $J = 4.9, 1.2$  Hz, 1H), 3.74 (d,  $J = 18.0$  Hz, 1H), 3.22 (s, 3H), 3.10 (d,  $J = 17.9$  Hz, 1H), 2.97 (s, 3H).  $^{13}\text{C}$  NMR (100 MHz,  $\text{CDCl}_3$ ):  $\delta = 173.8, 173.7, 170.2, 156.0, 147.4, 141.8, 138.5, 136.7, 135.9, 133.8, 129.7, 129.0, 126.8, 126.6, 124.9, 124.4, 124.0, 121.1, 119.0, 116.8, 72.0, 42.3, 25.9, 25.3$ . HRMS (ESI):  $m/z$  calcd for  $\text{C}_{24}\text{H}_{18}\text{N}_3\text{O}_3\text{S}_2^+$   $[\text{M}+\text{H}]^+$ : 460.0784, found: 460.0784.

## 9. $^1\text{H}$ , $^{13}\text{C}$ and $^{19}\text{F}$ NMR spectra

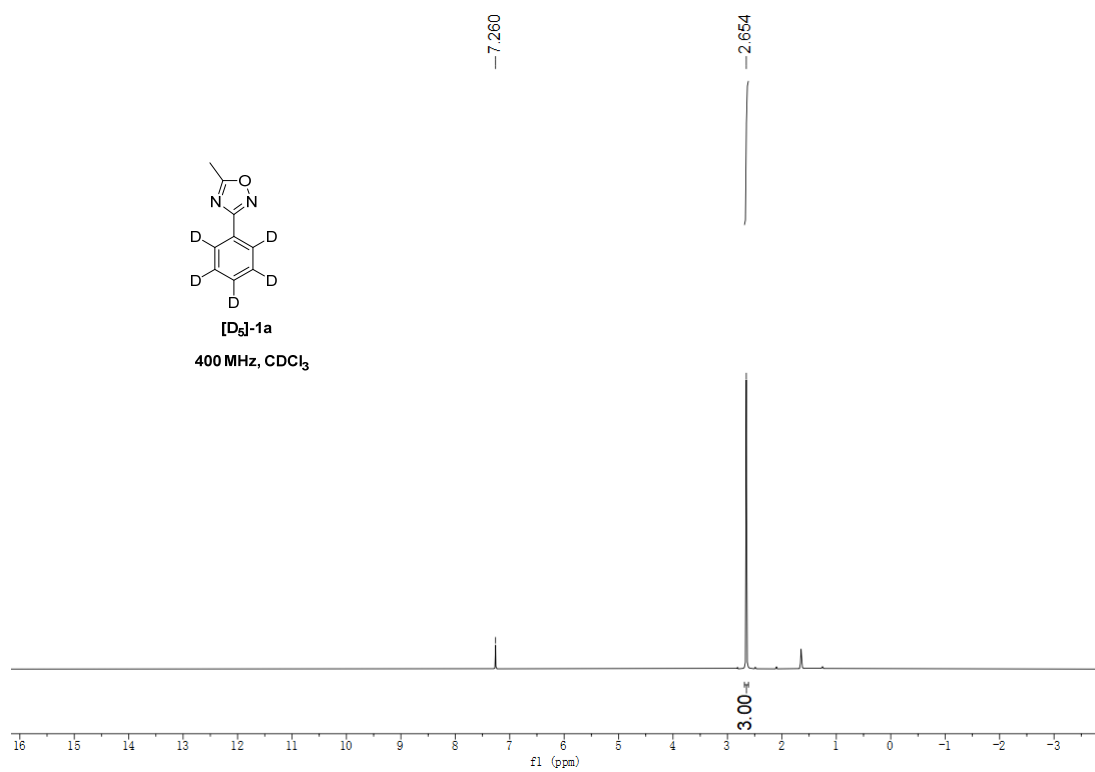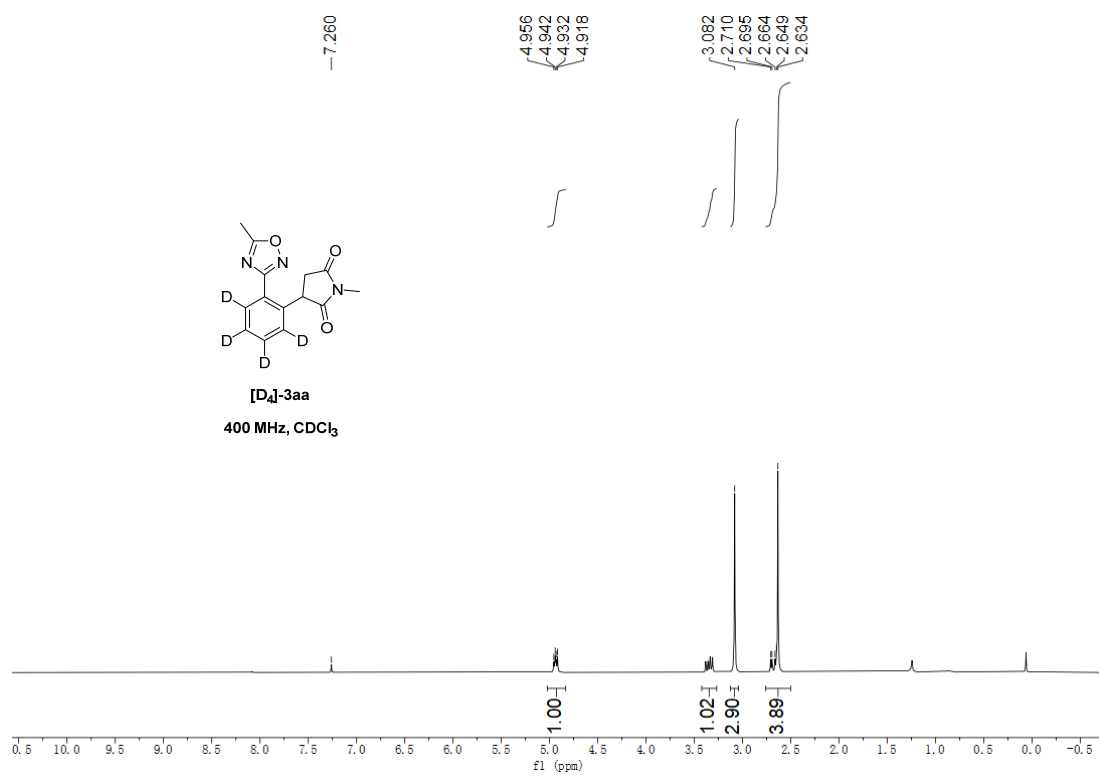

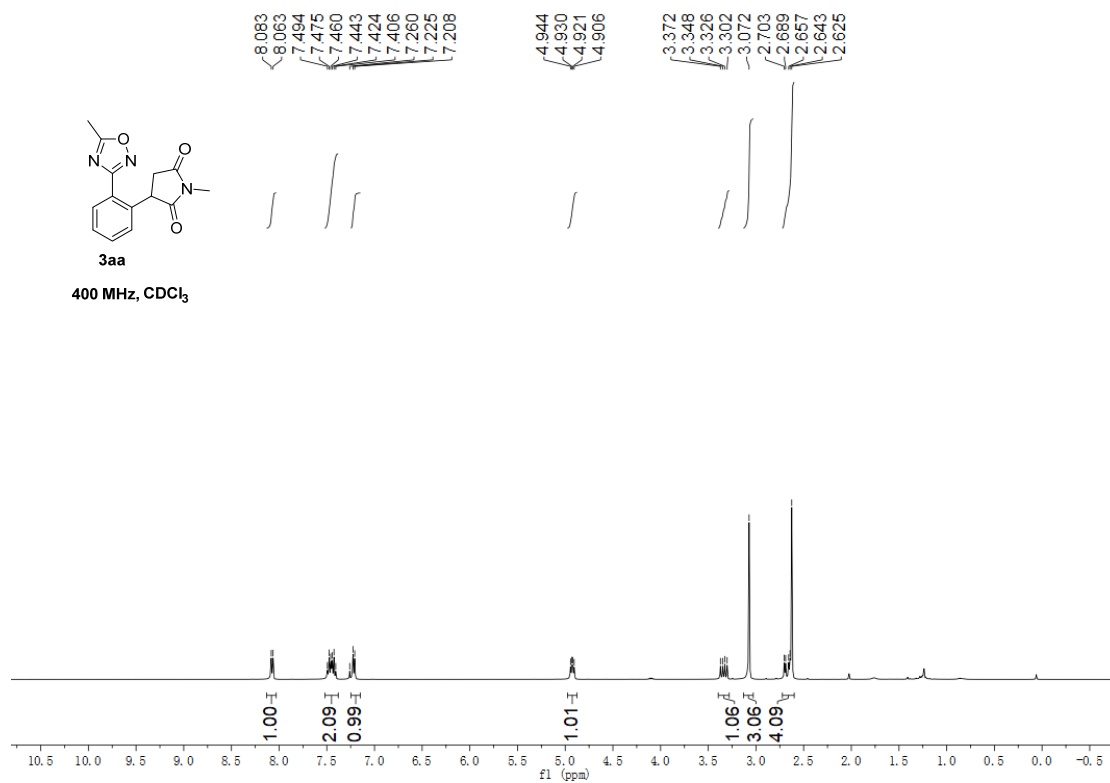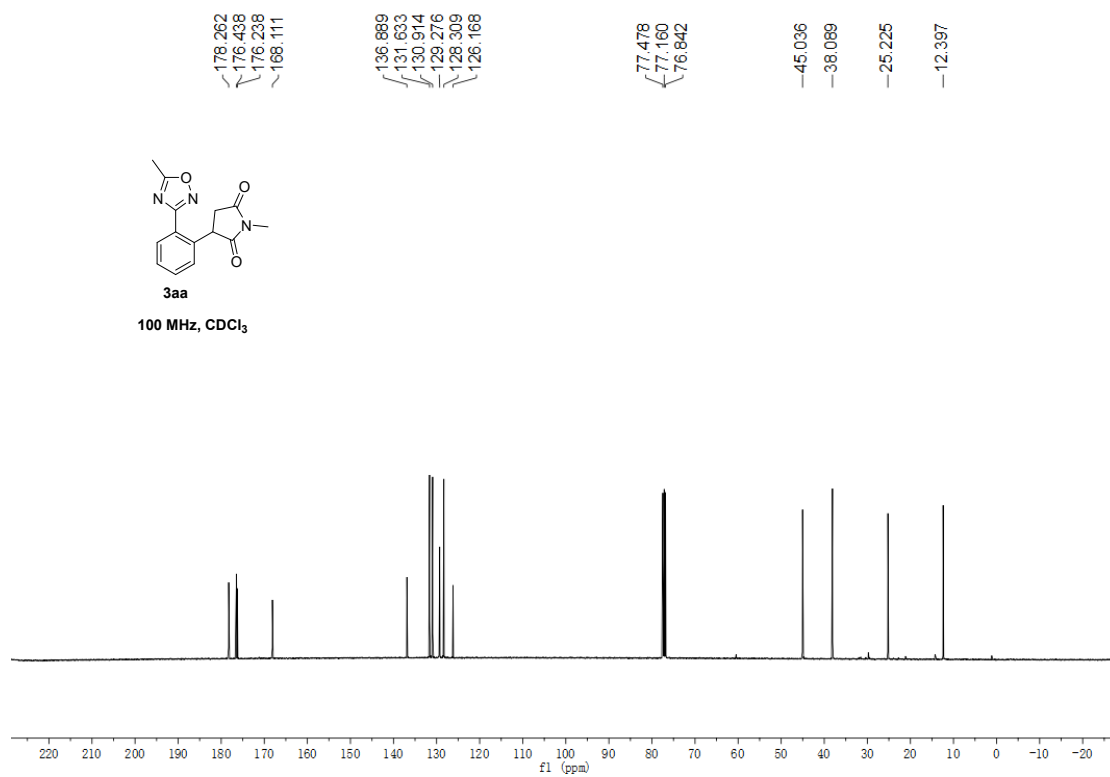

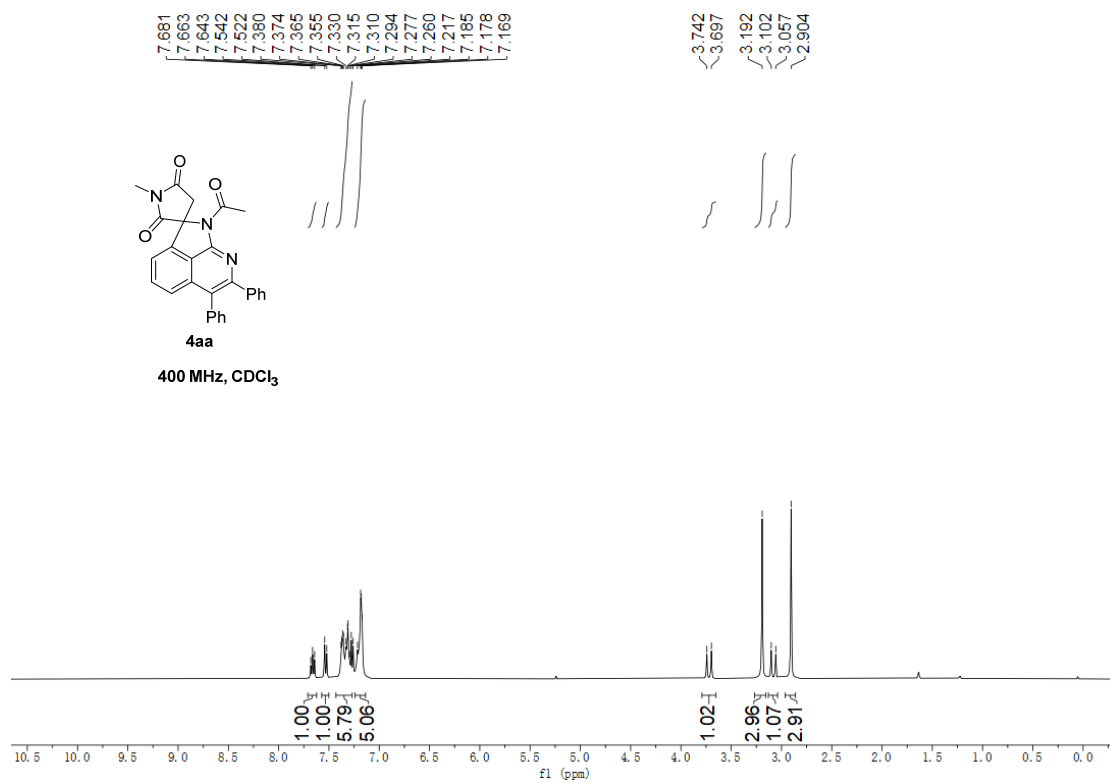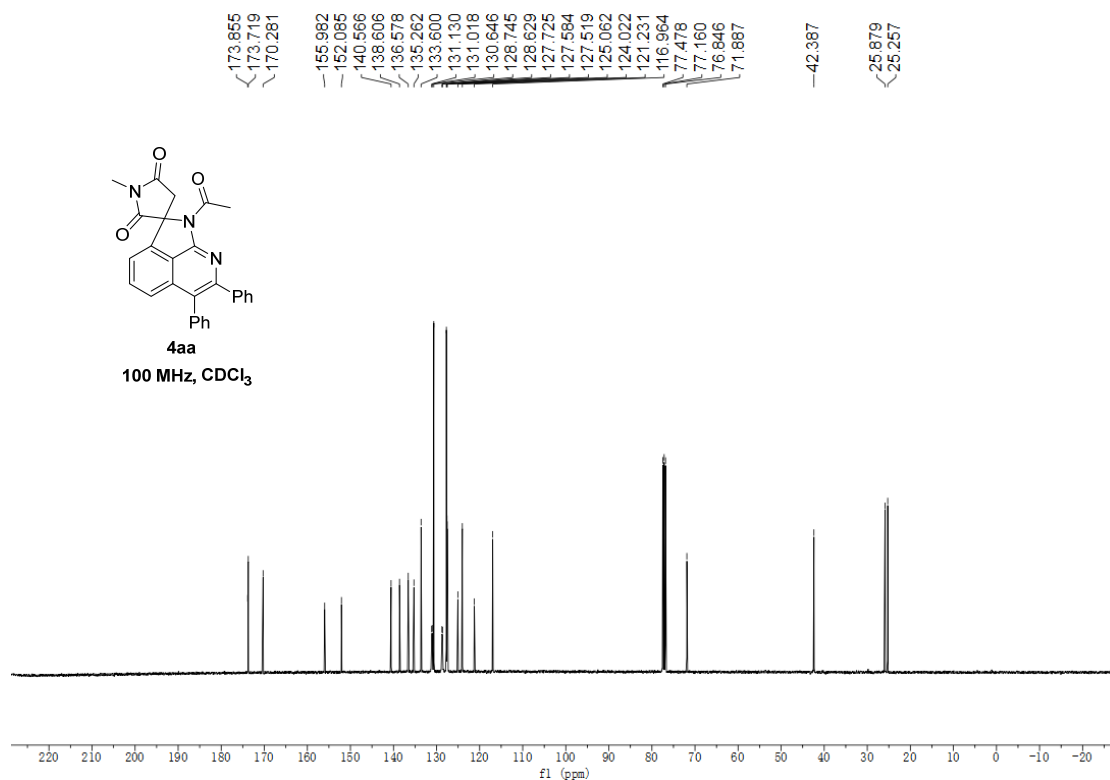

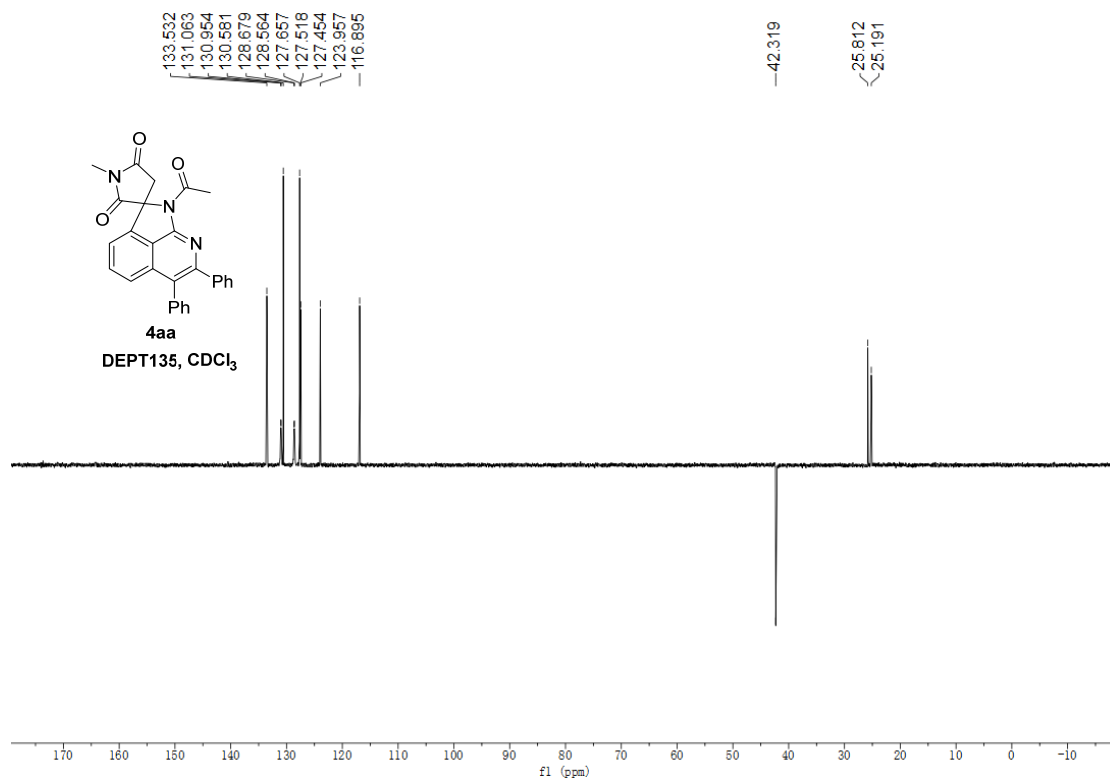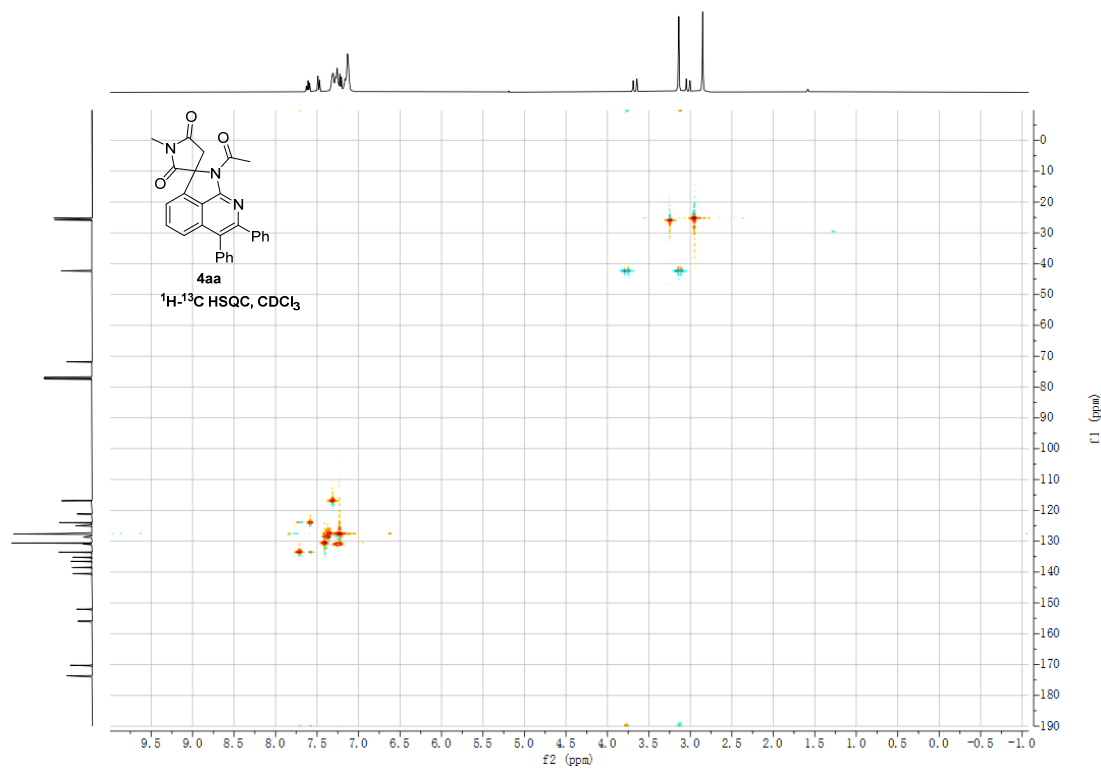

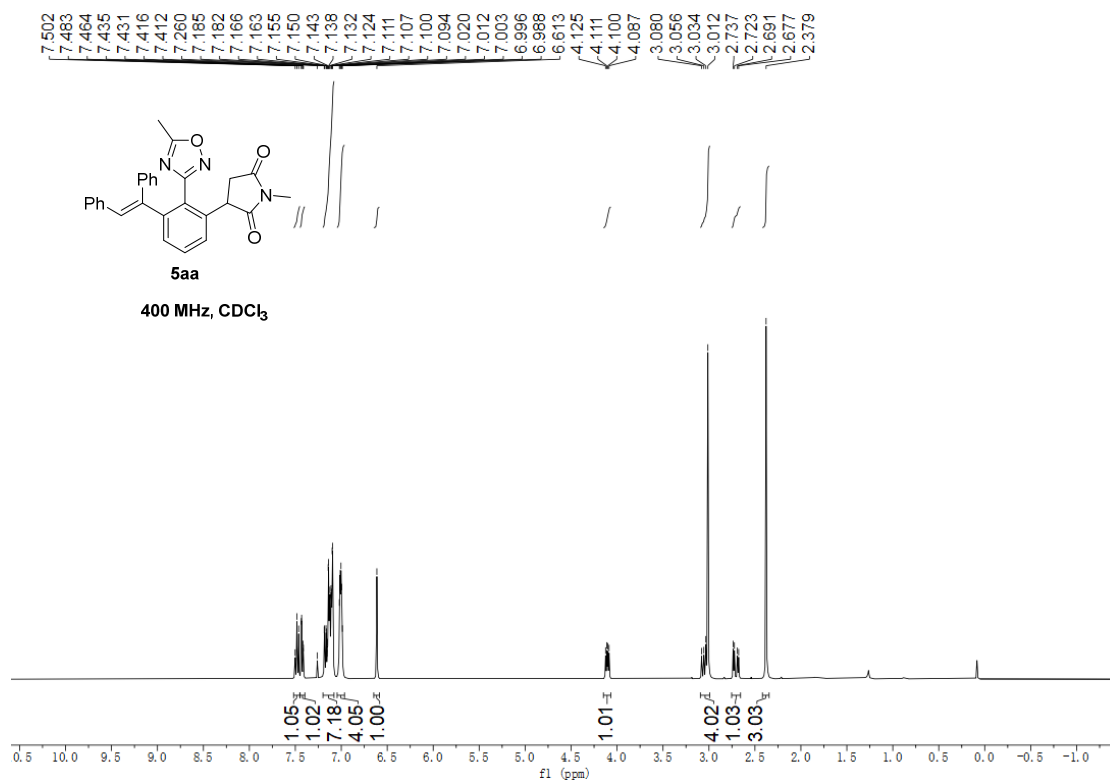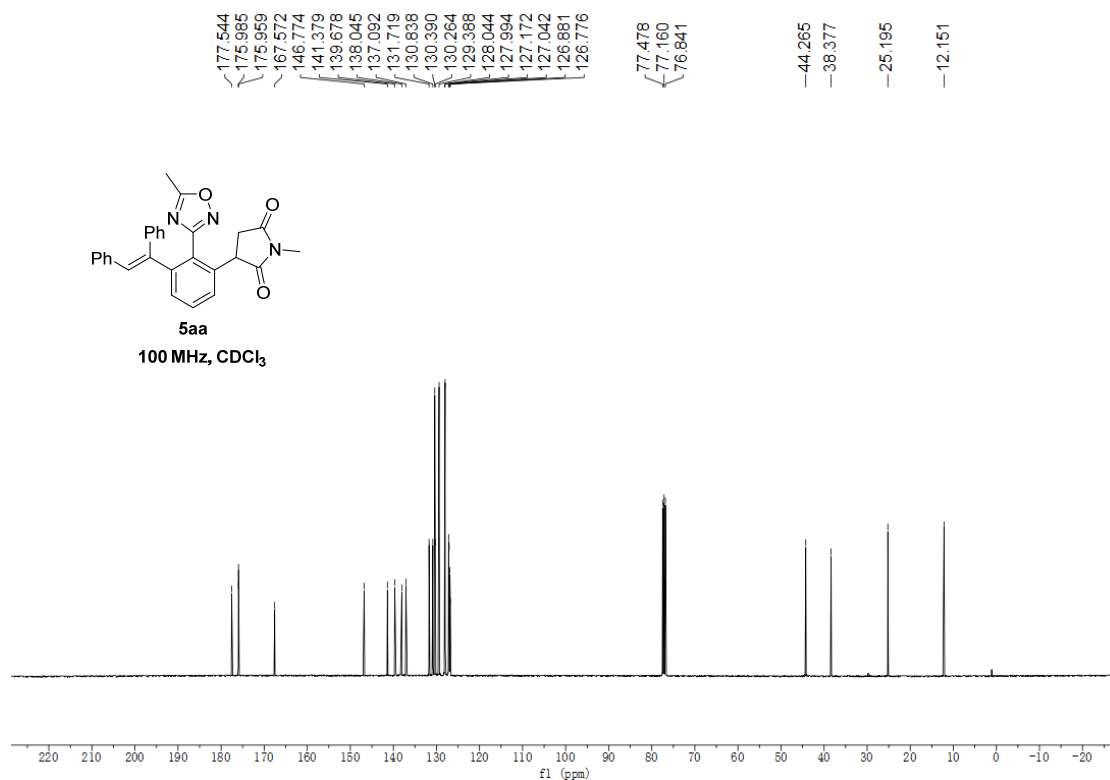



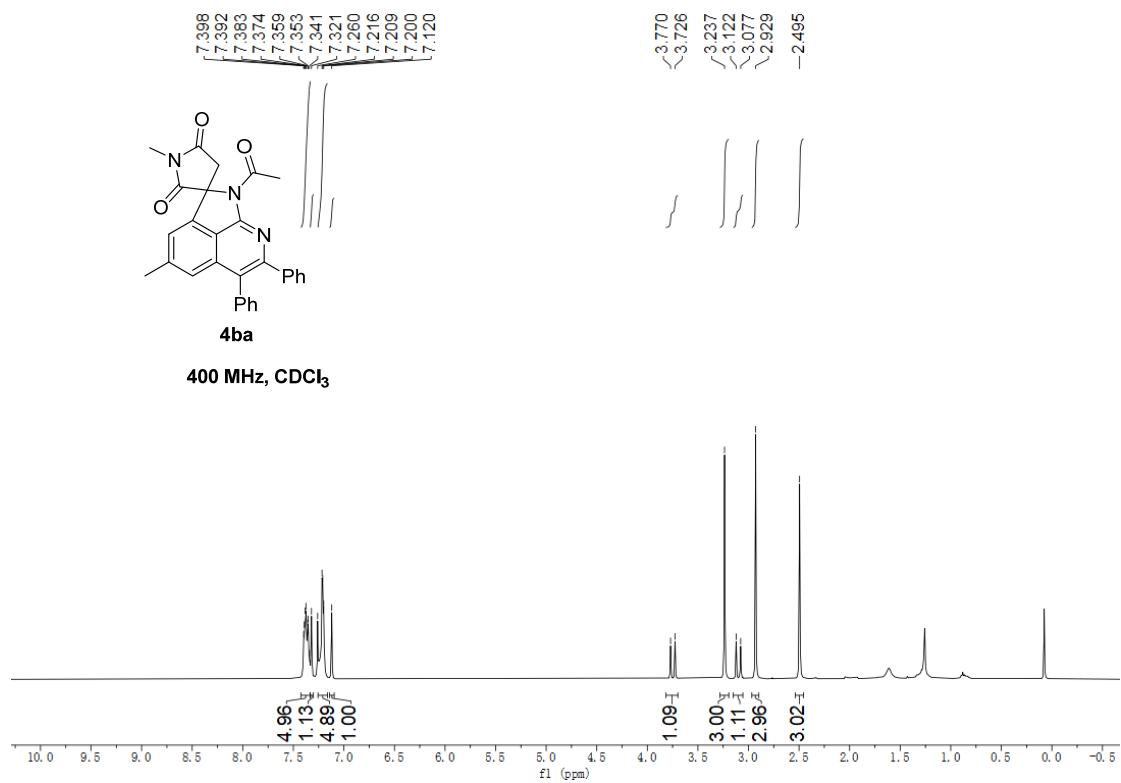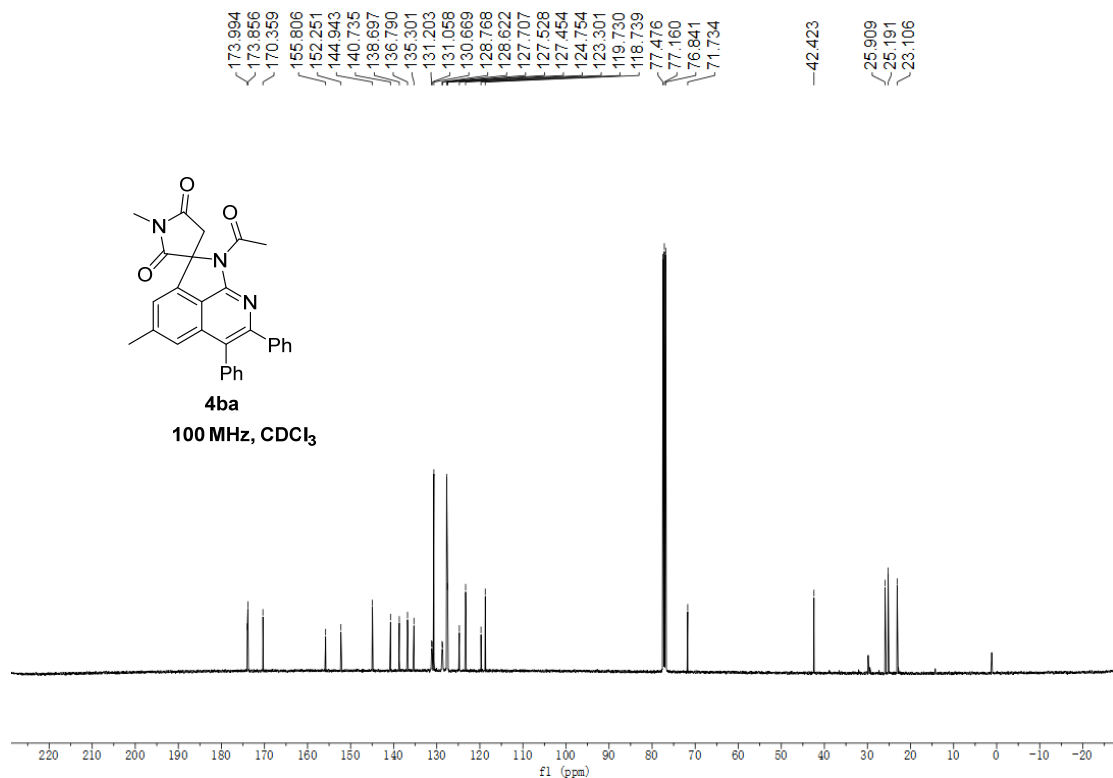

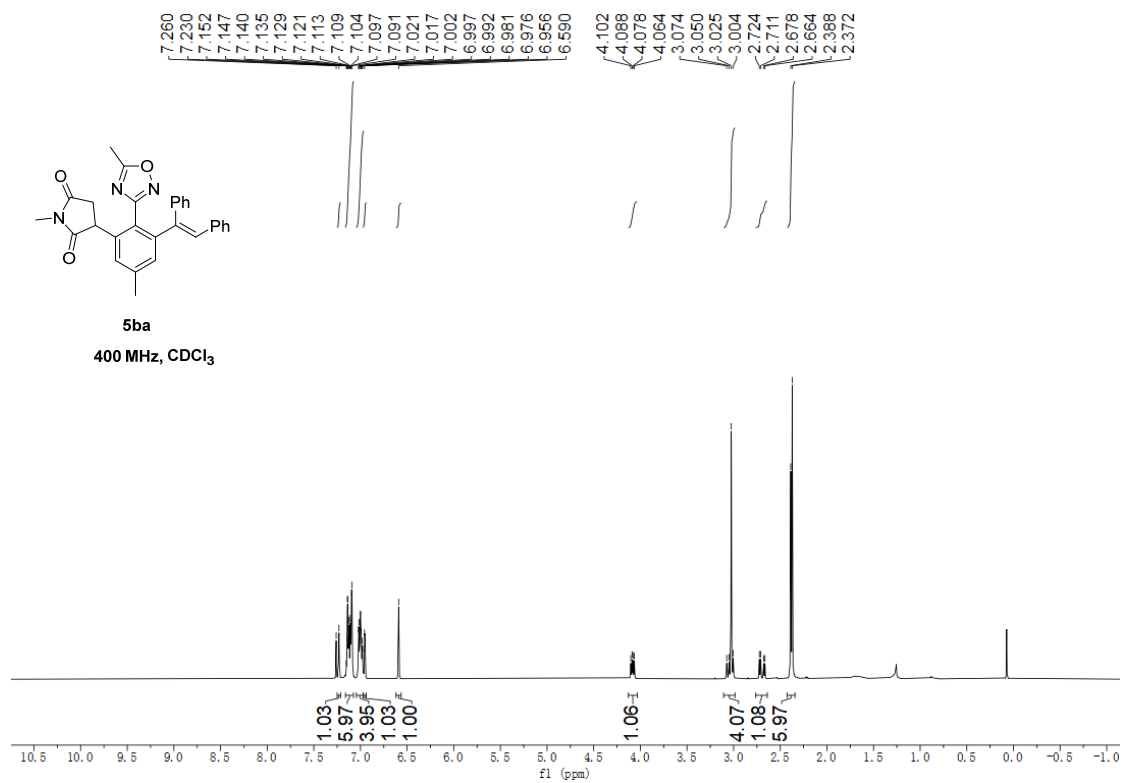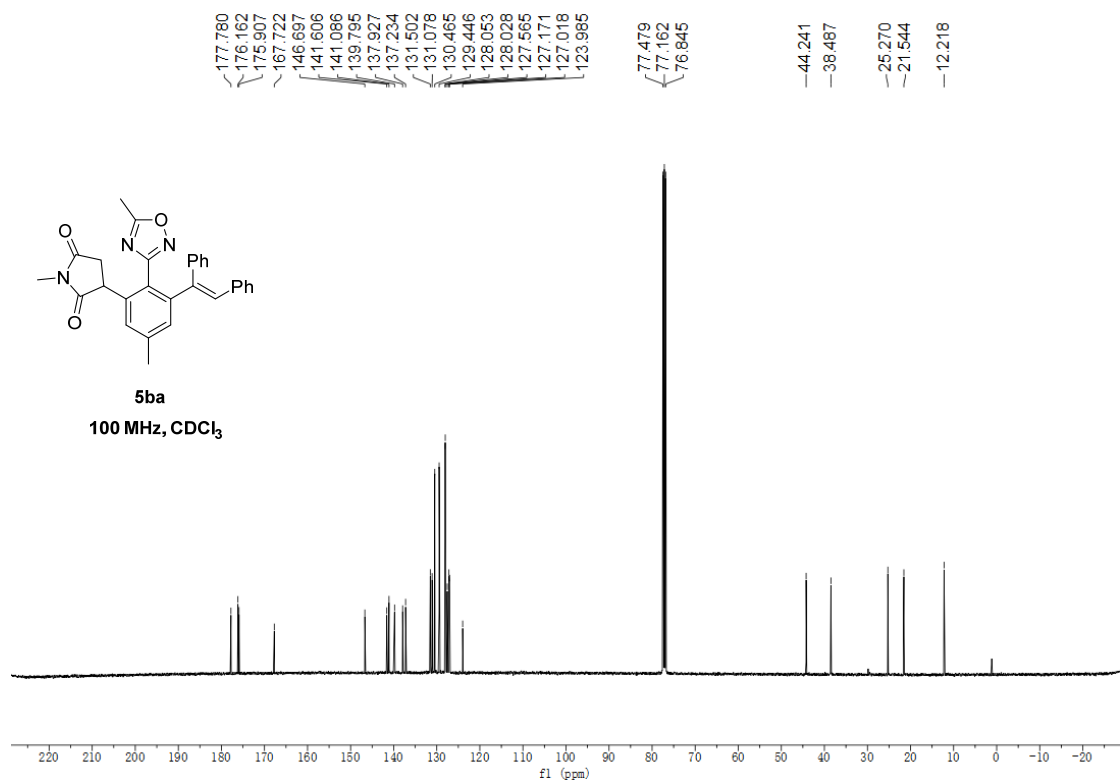

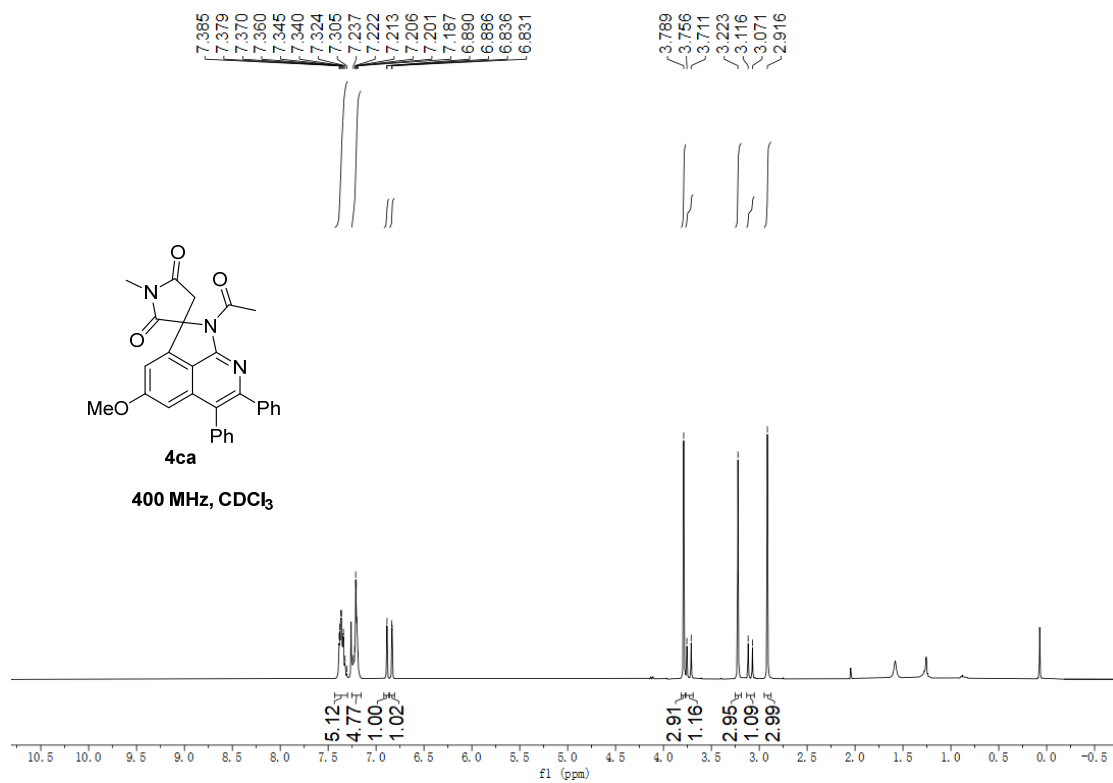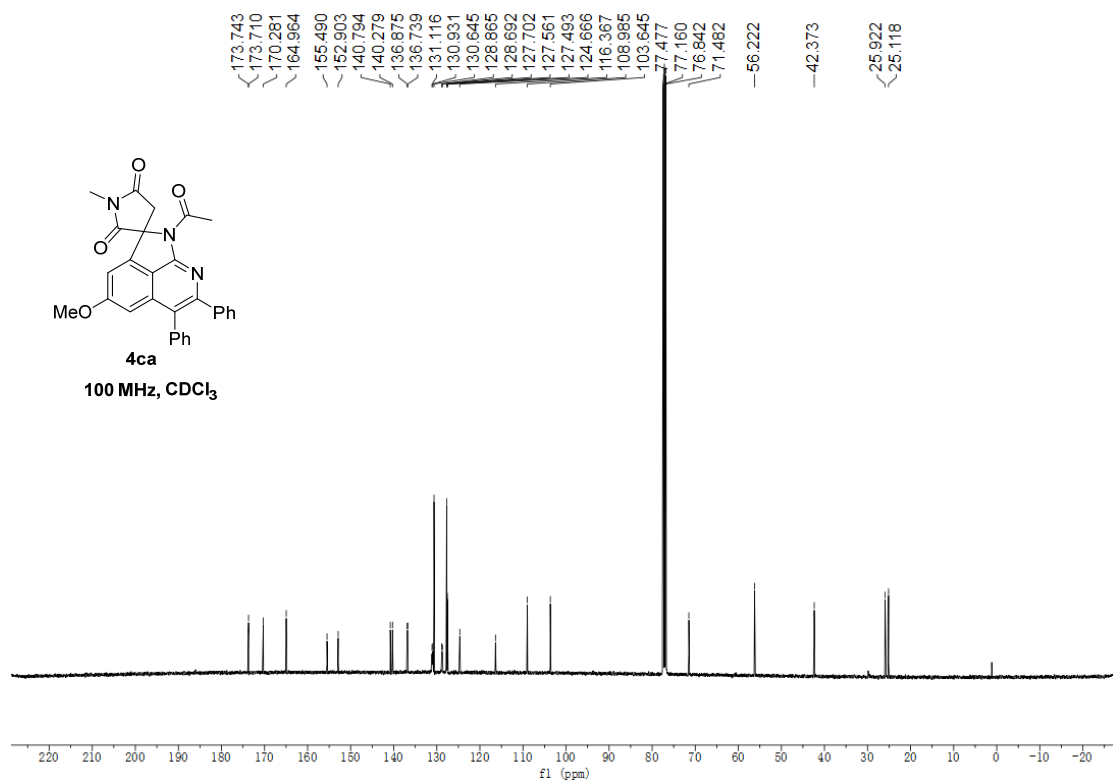

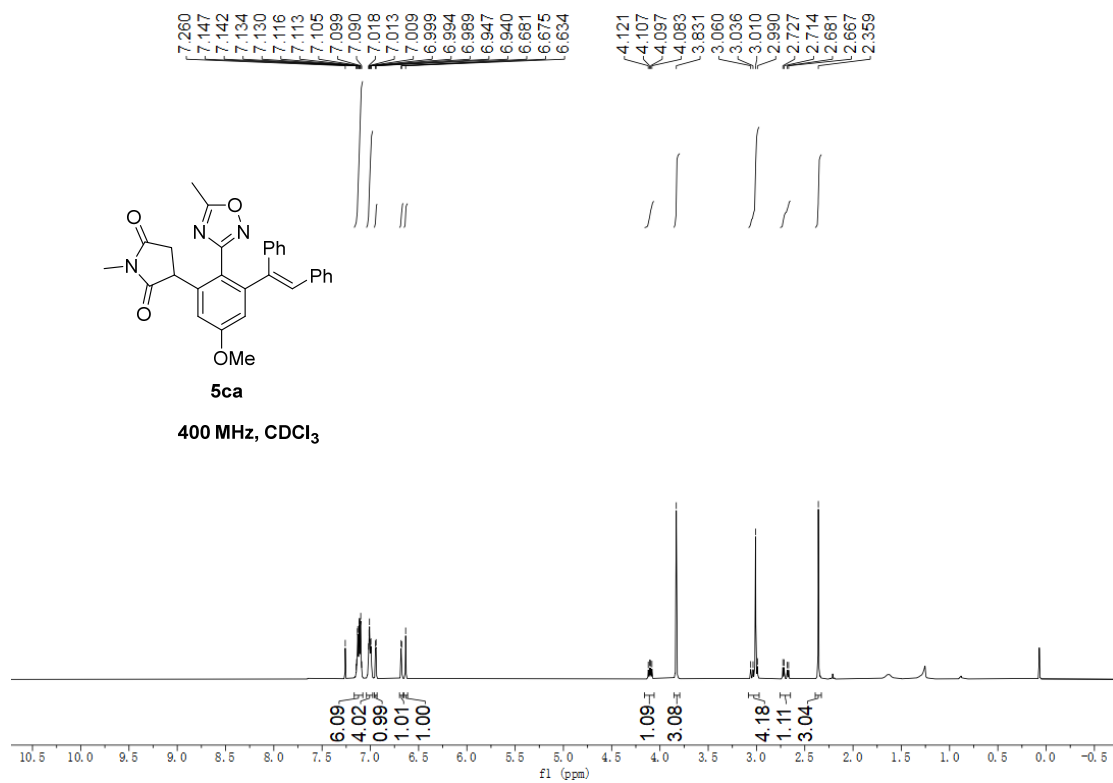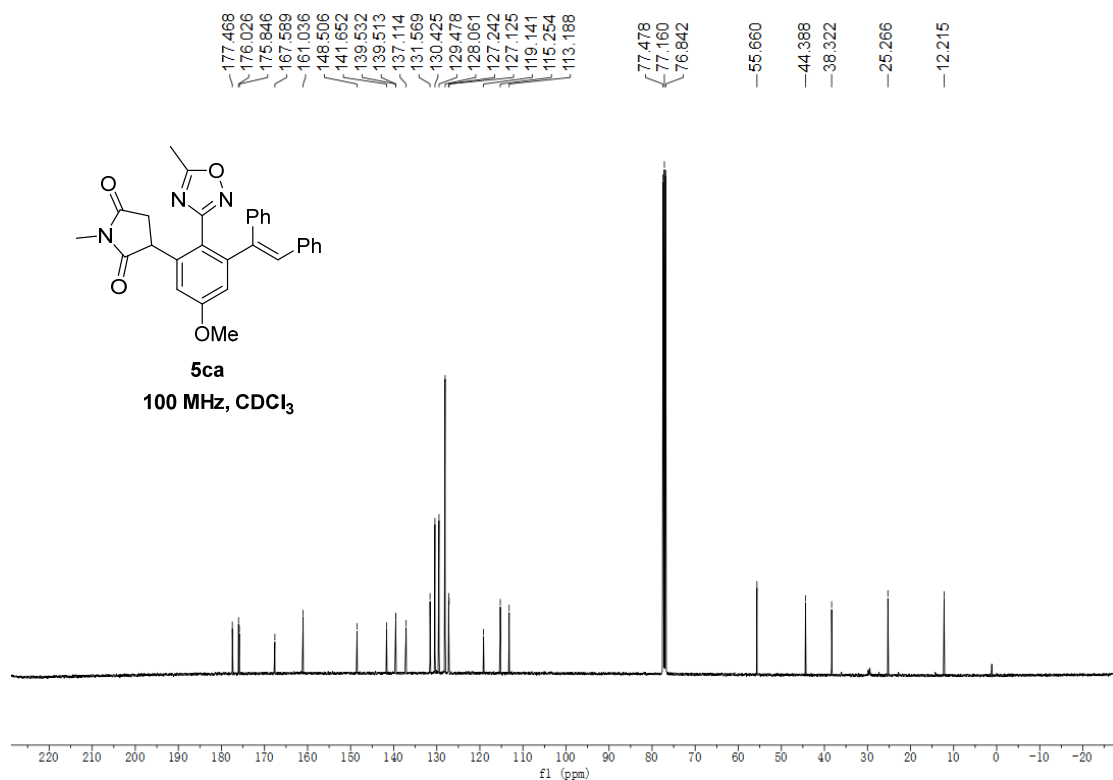

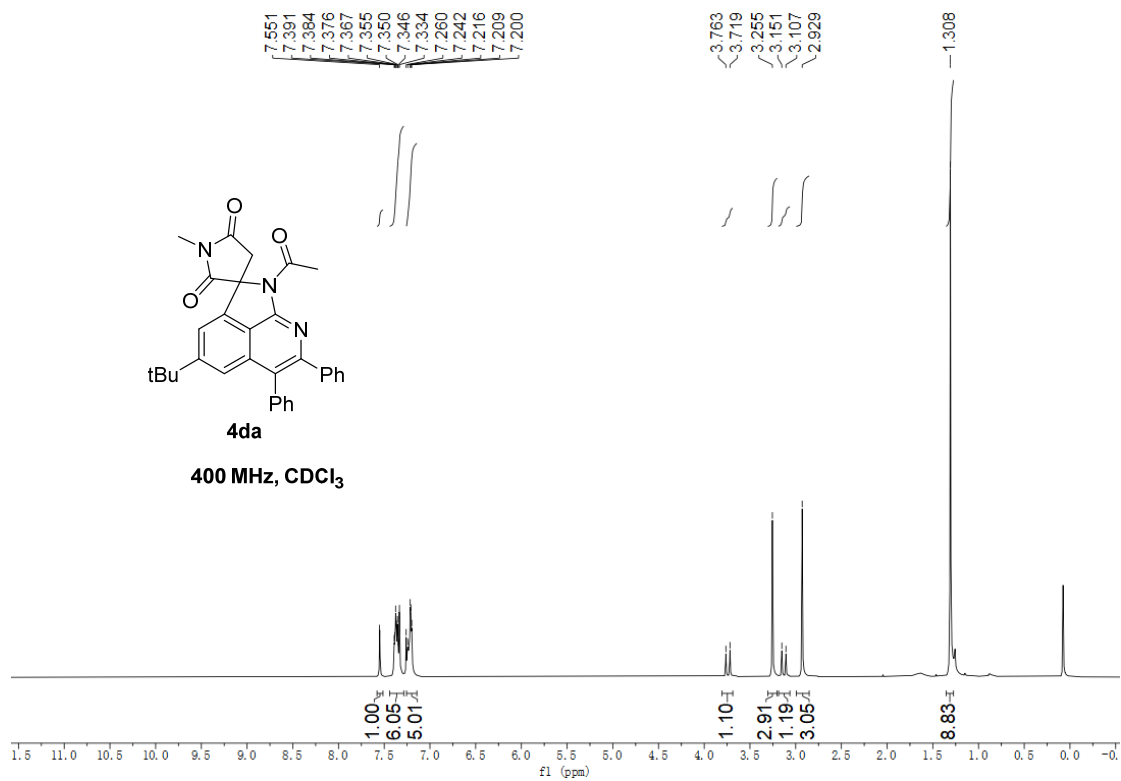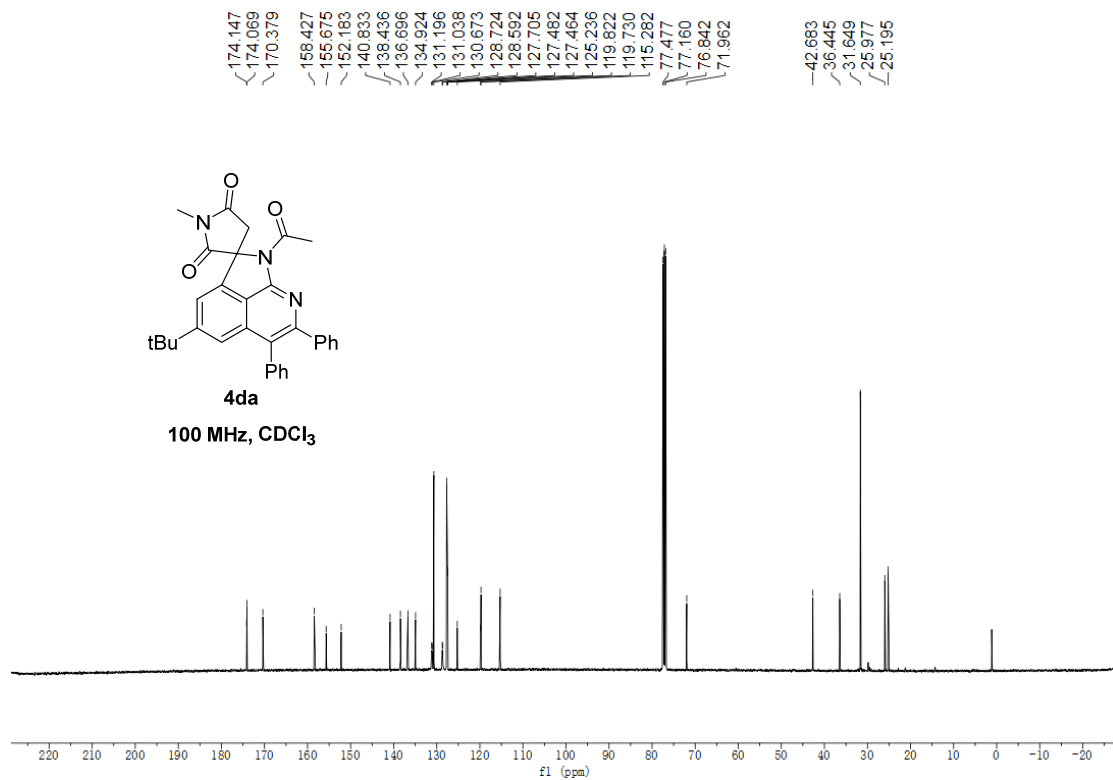

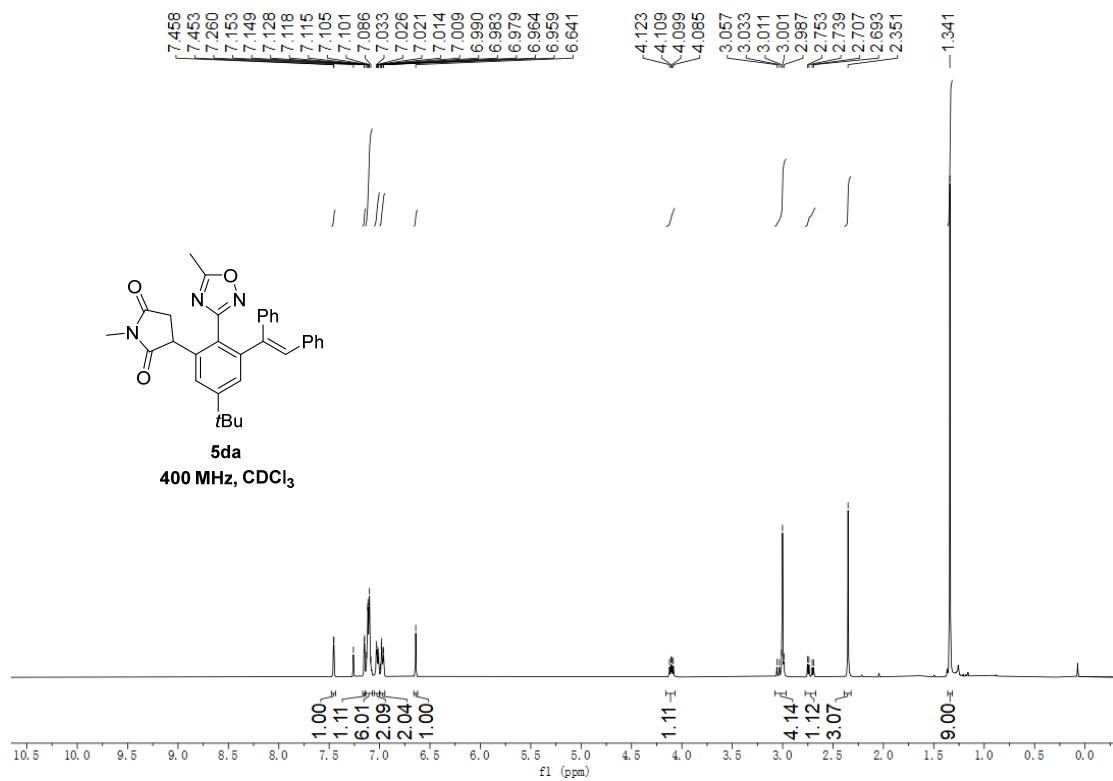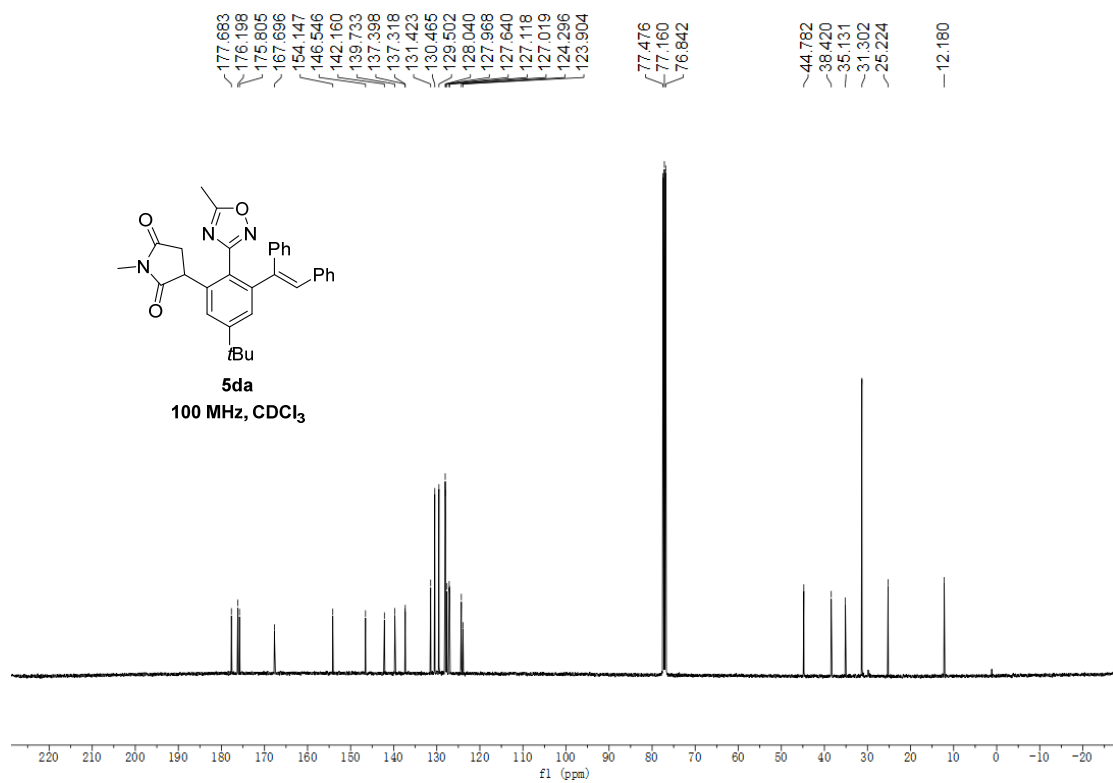

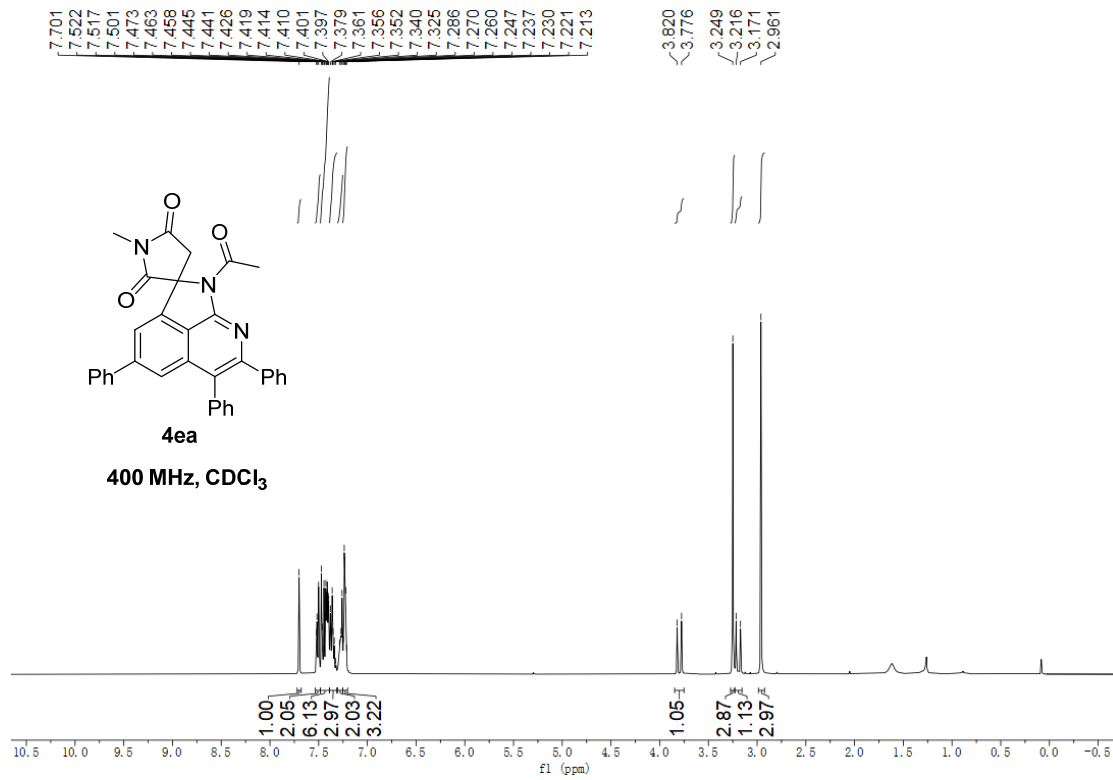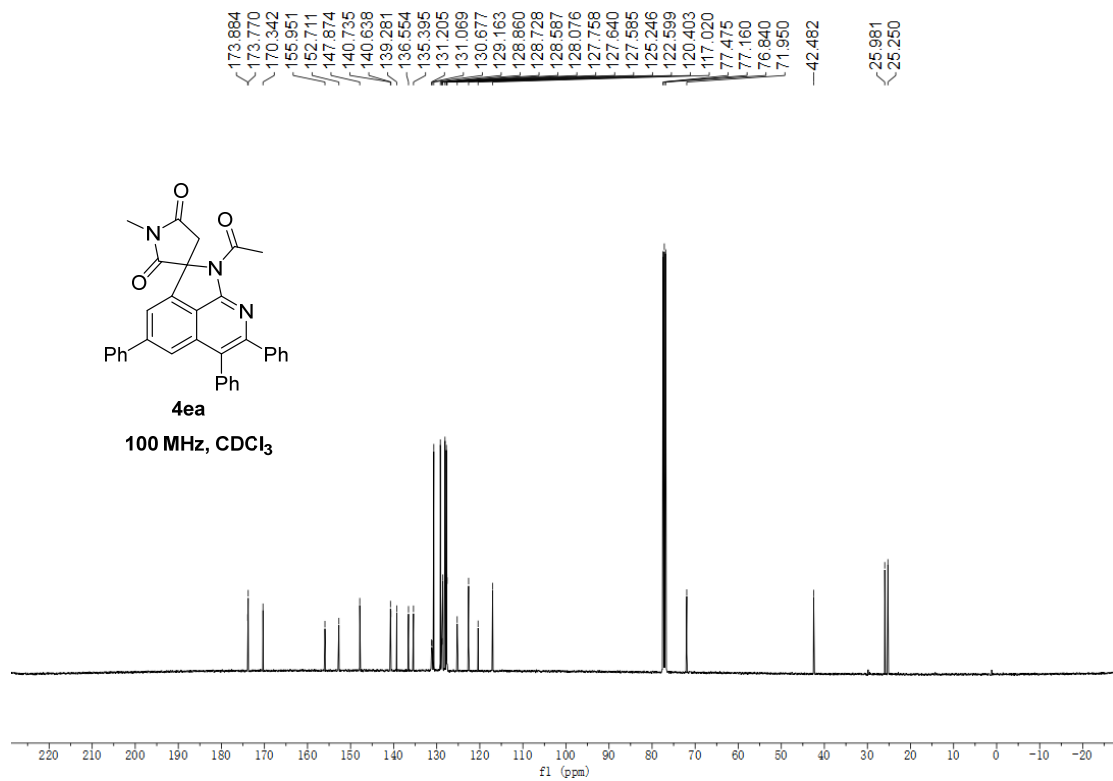

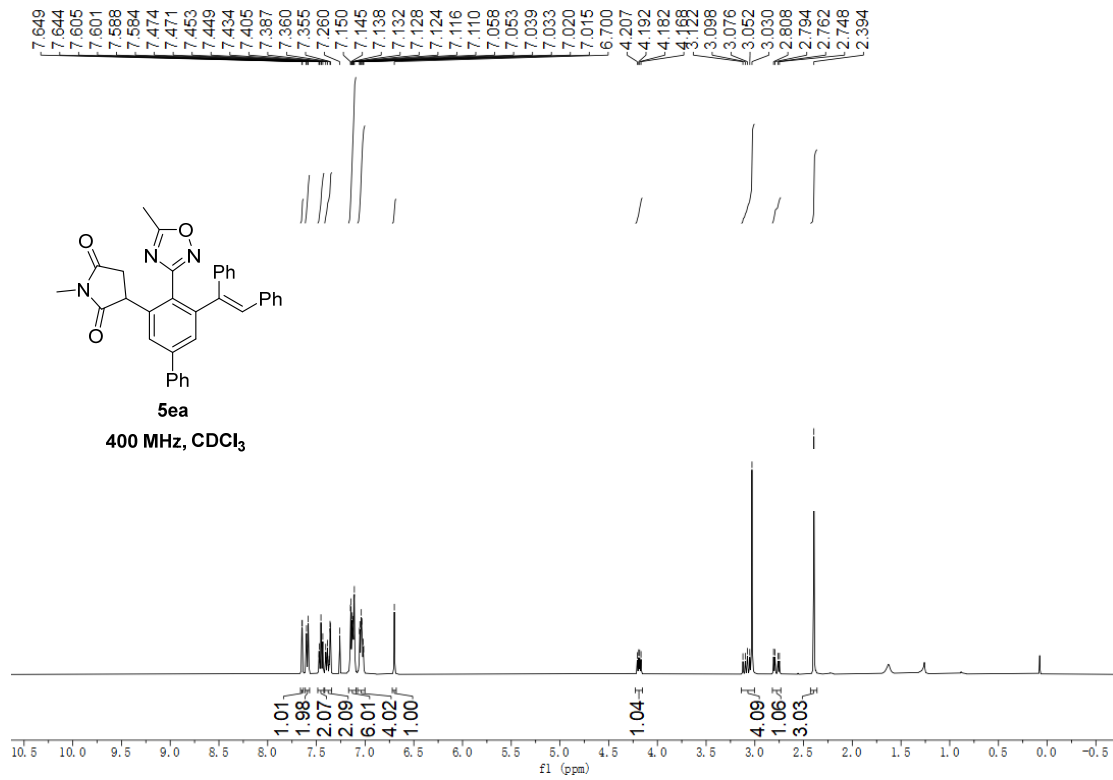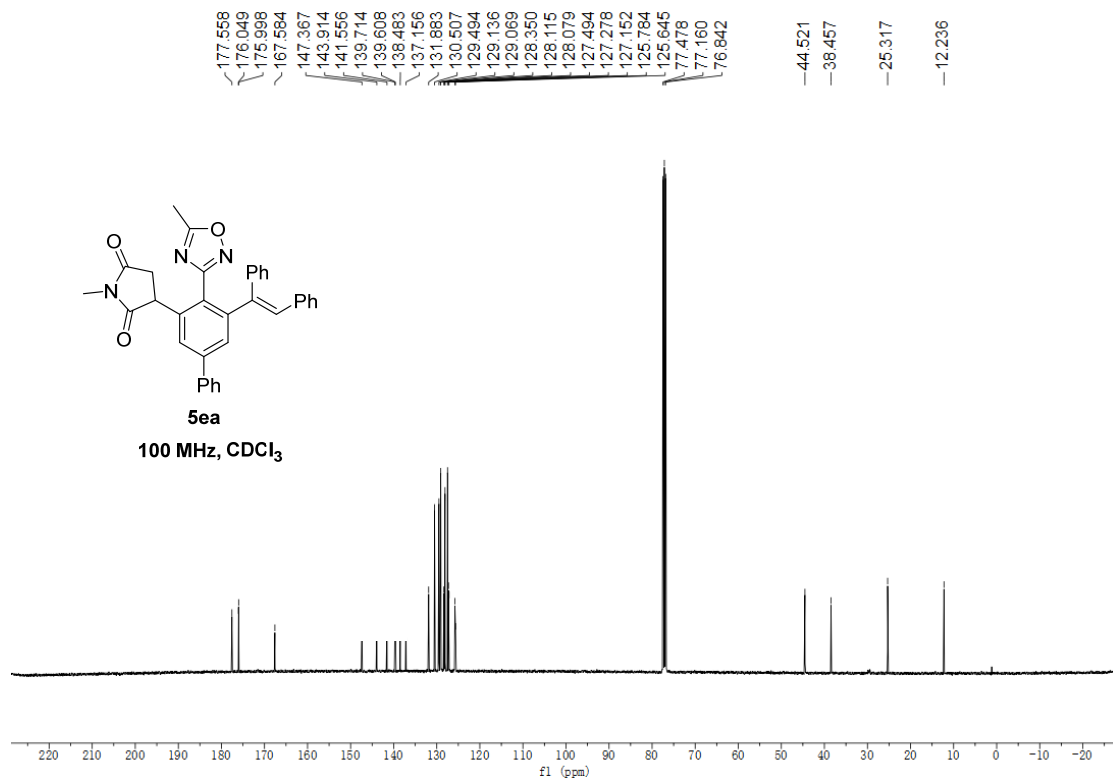



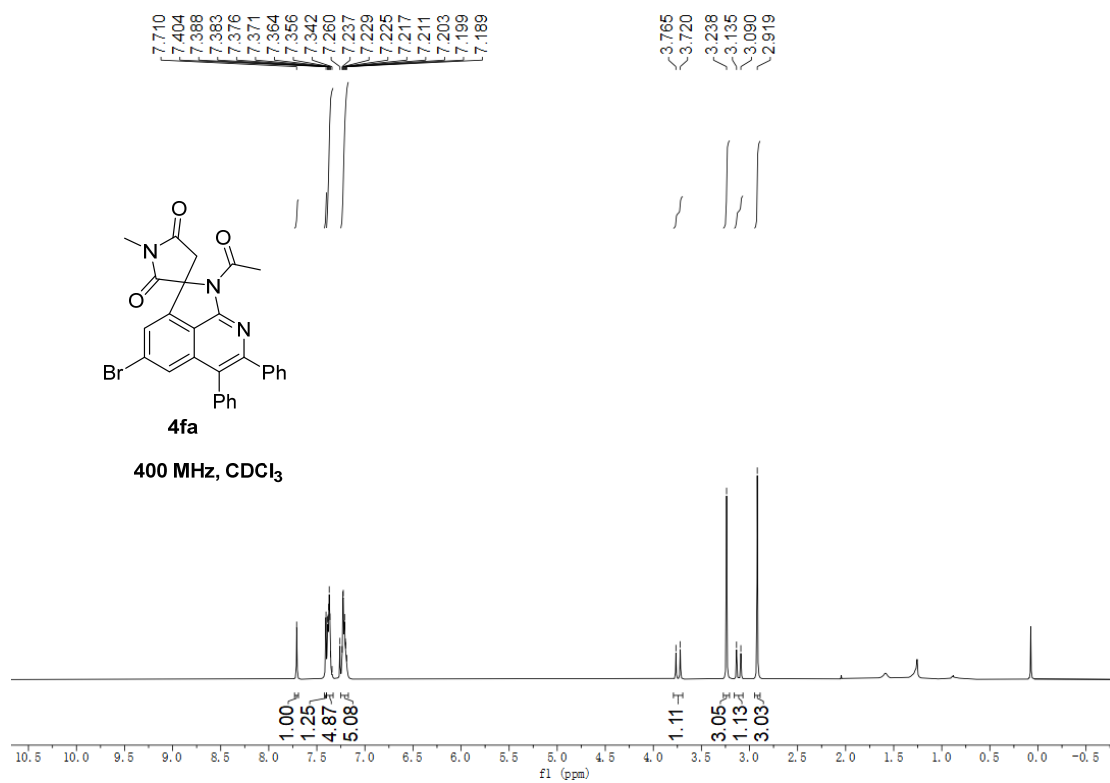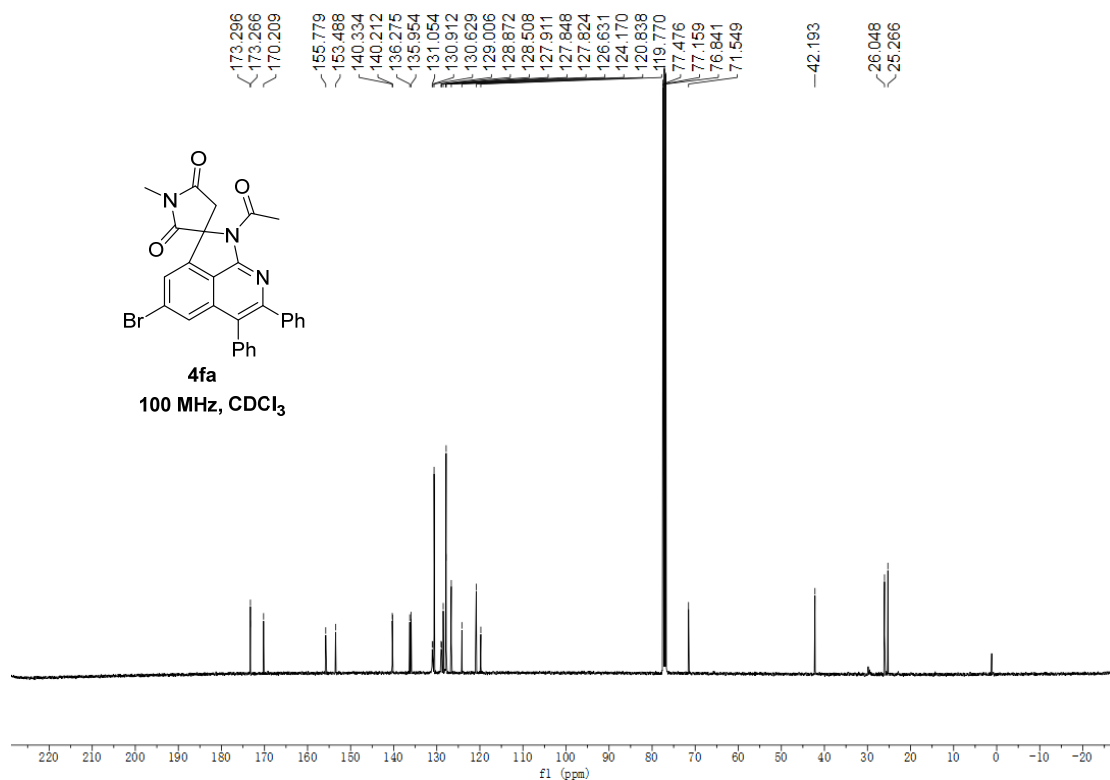

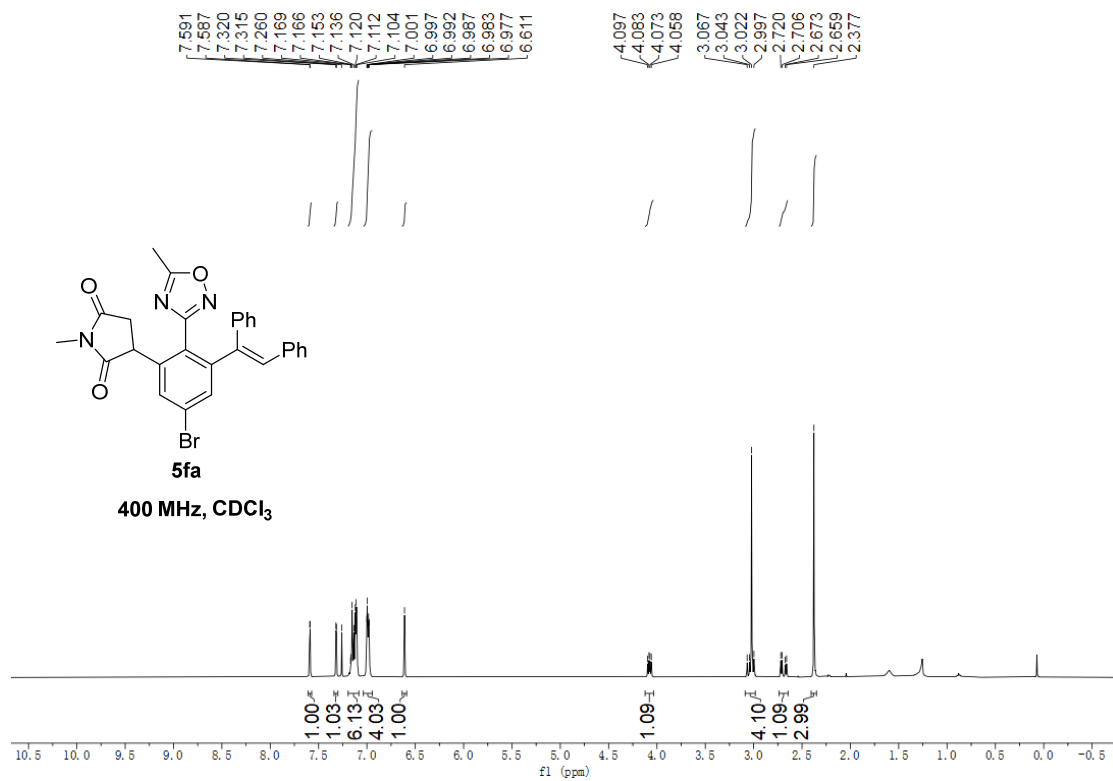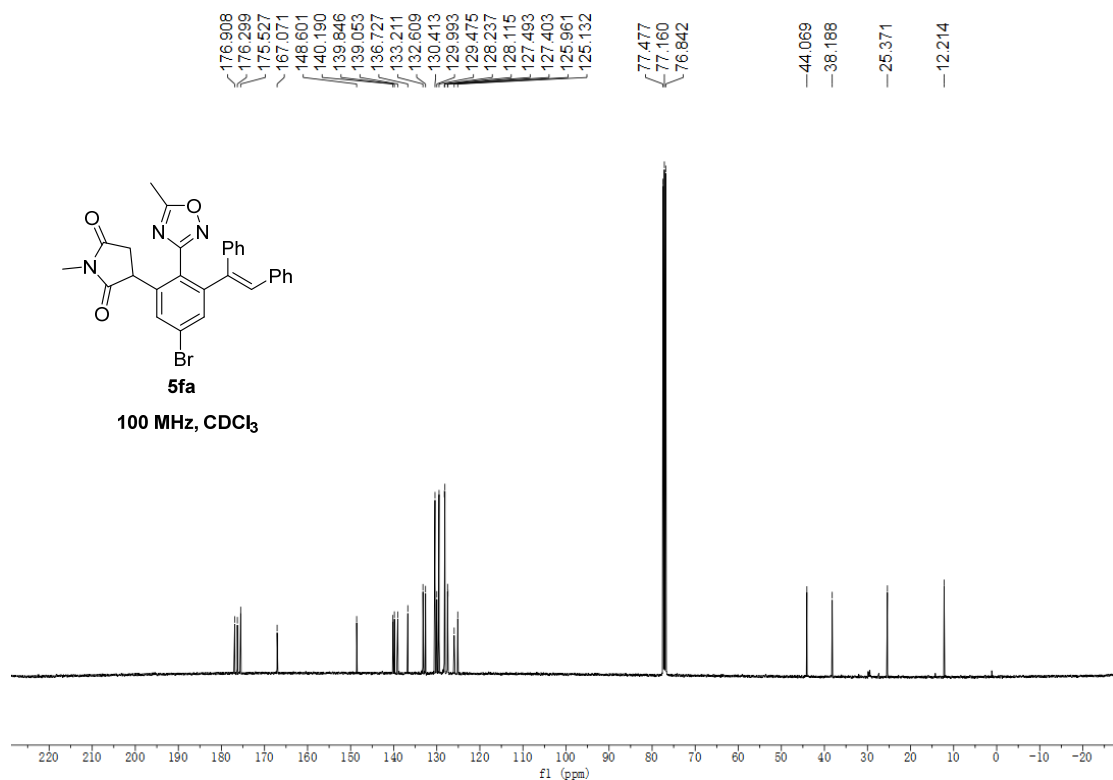

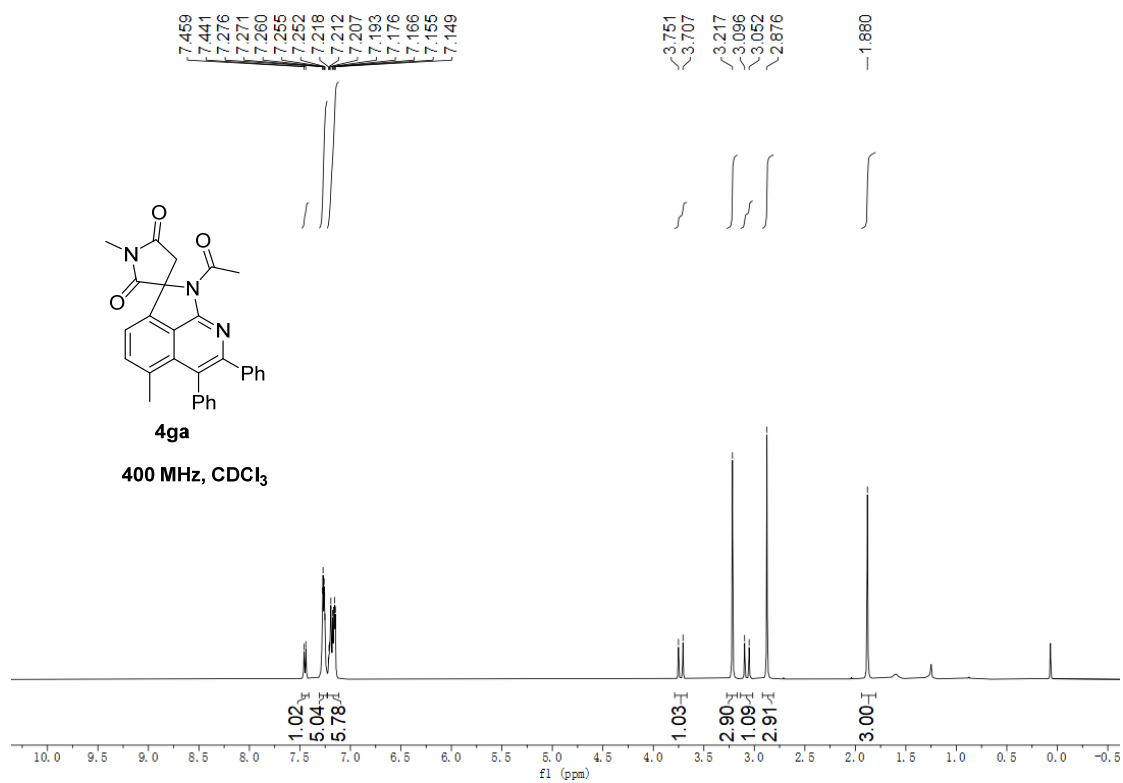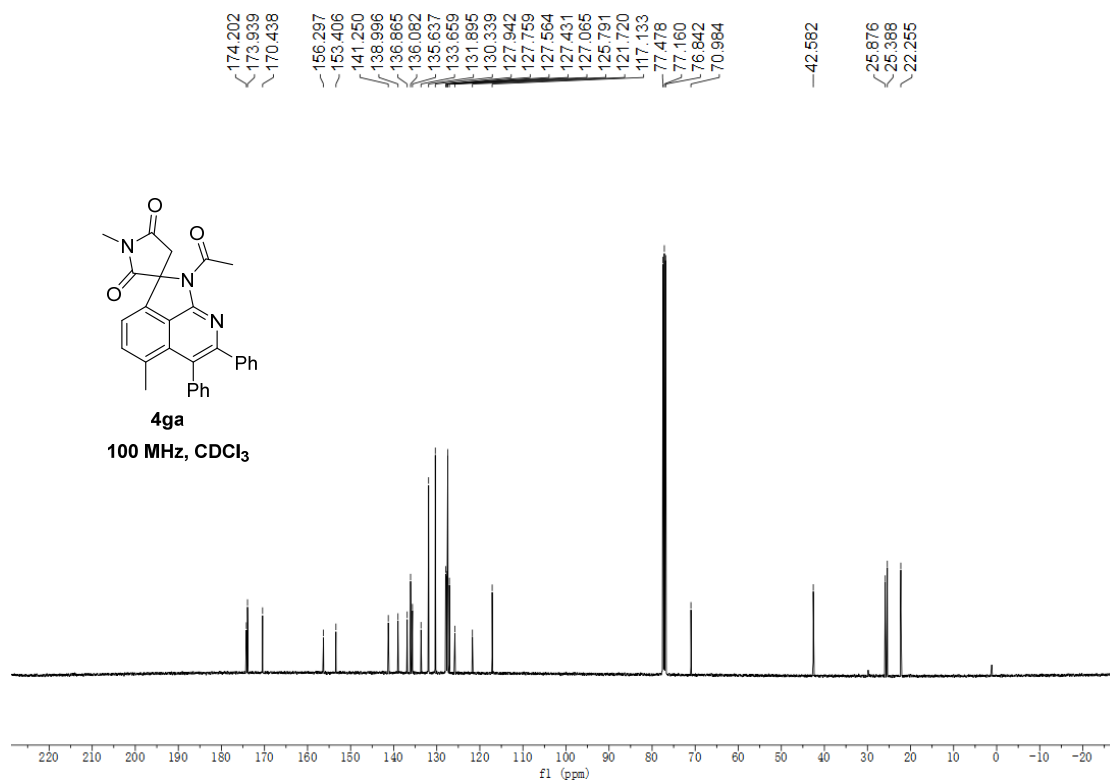

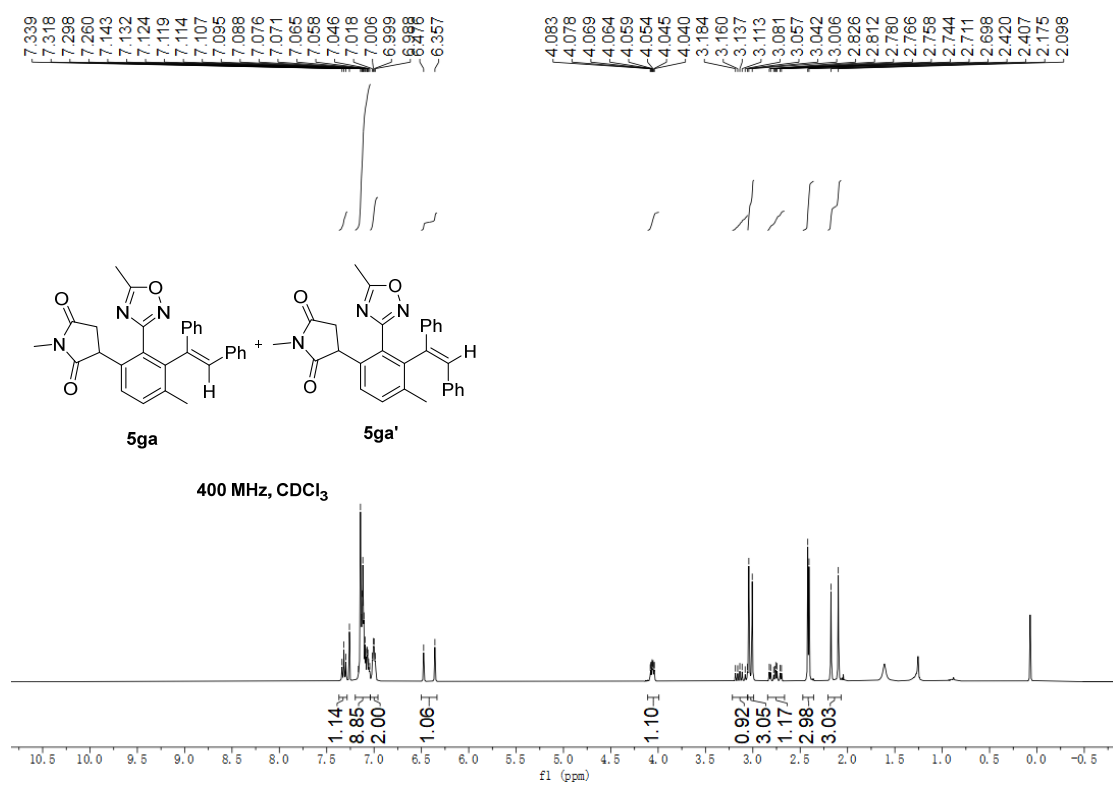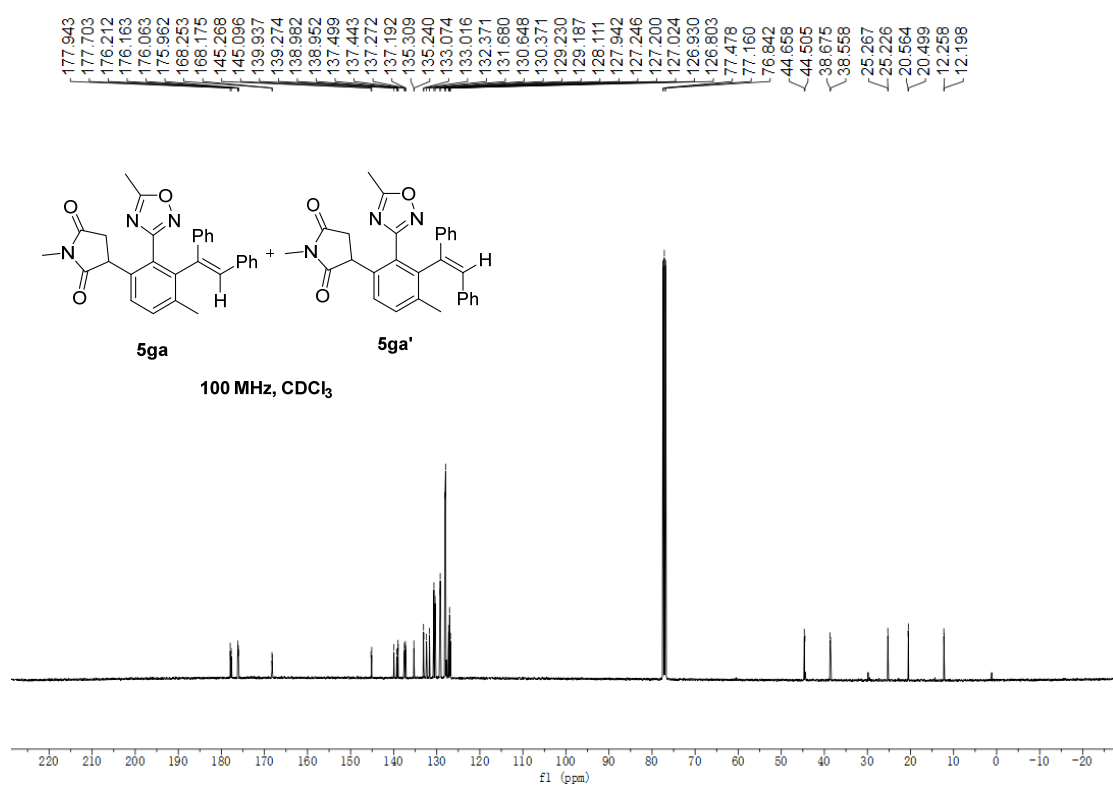

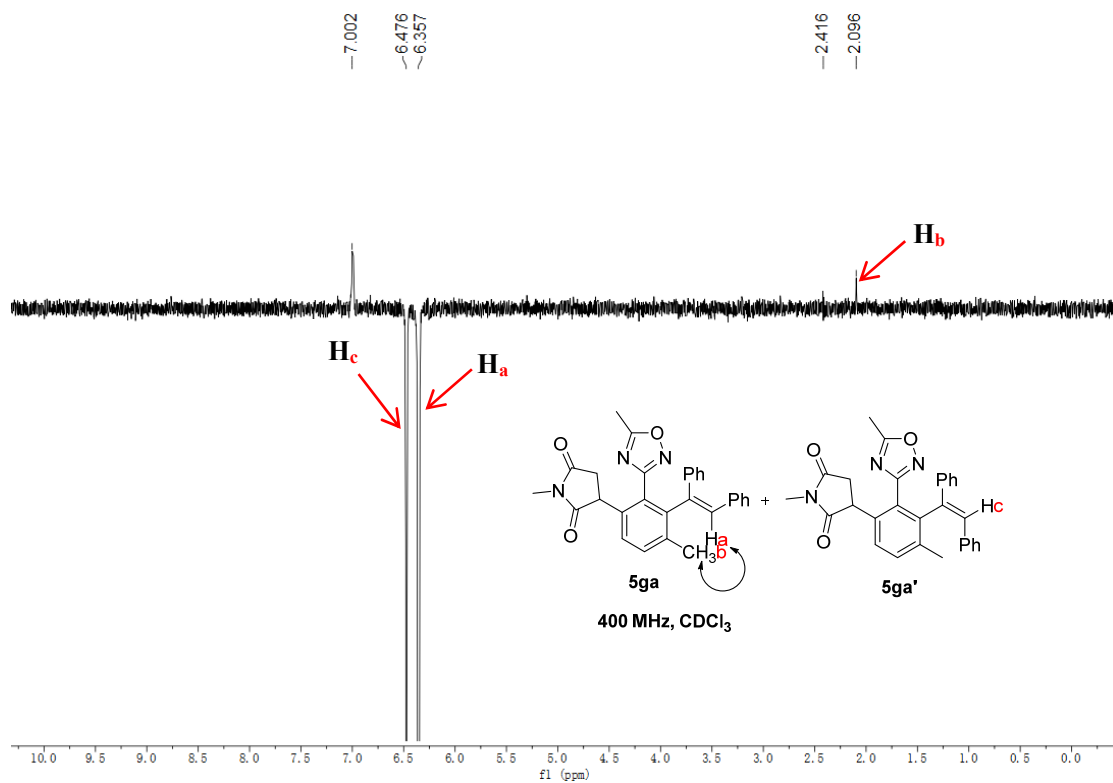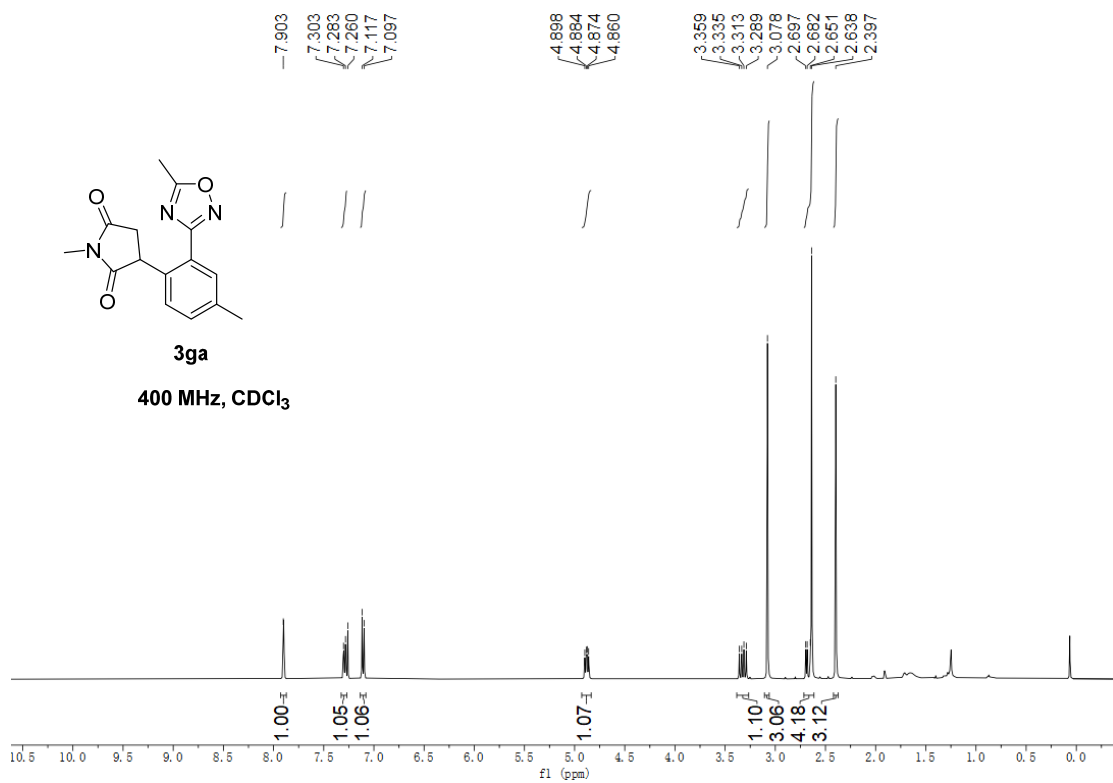

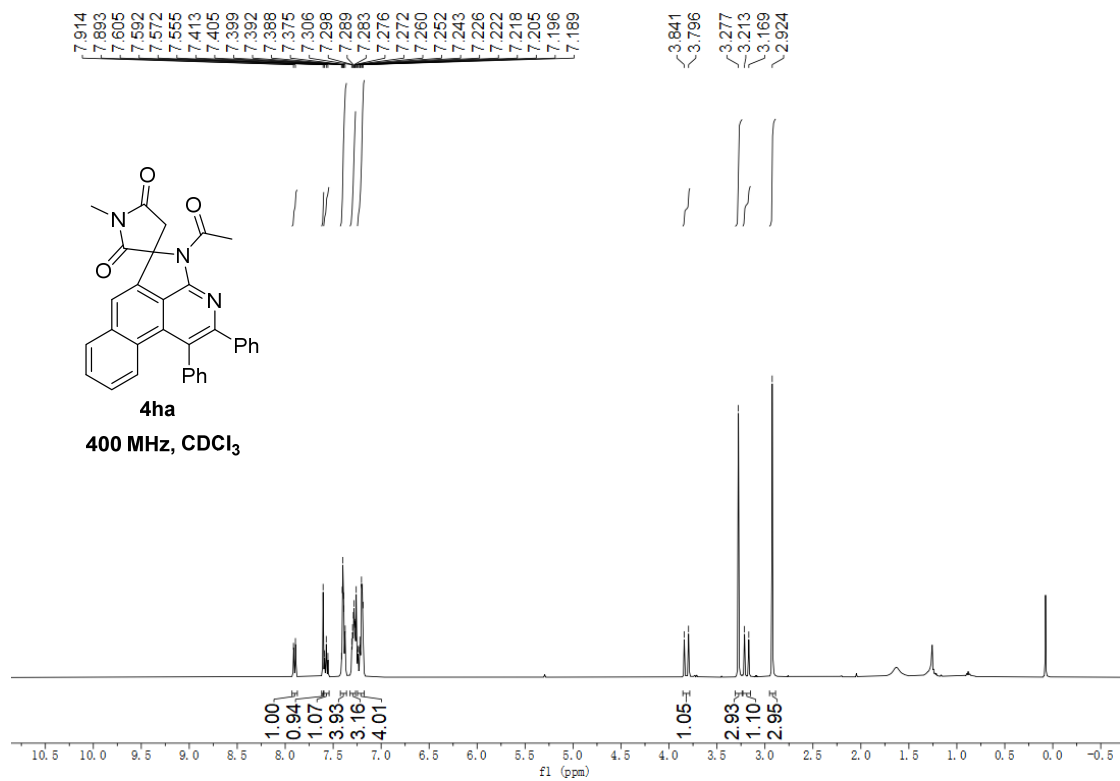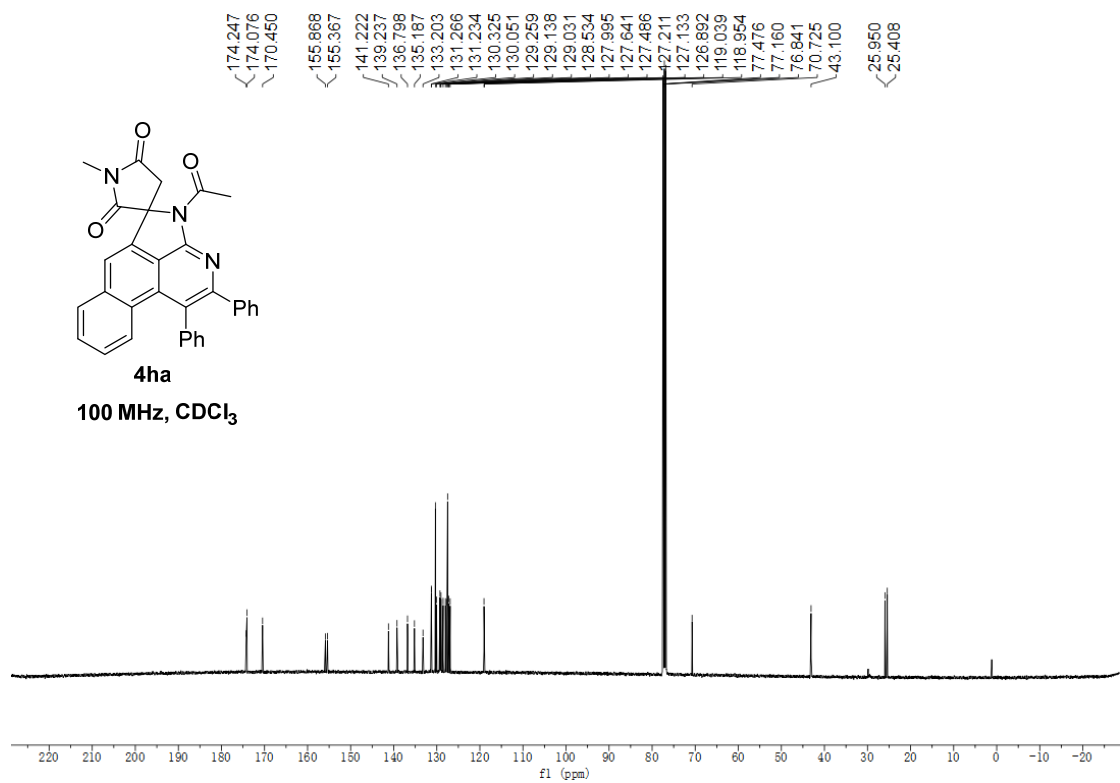

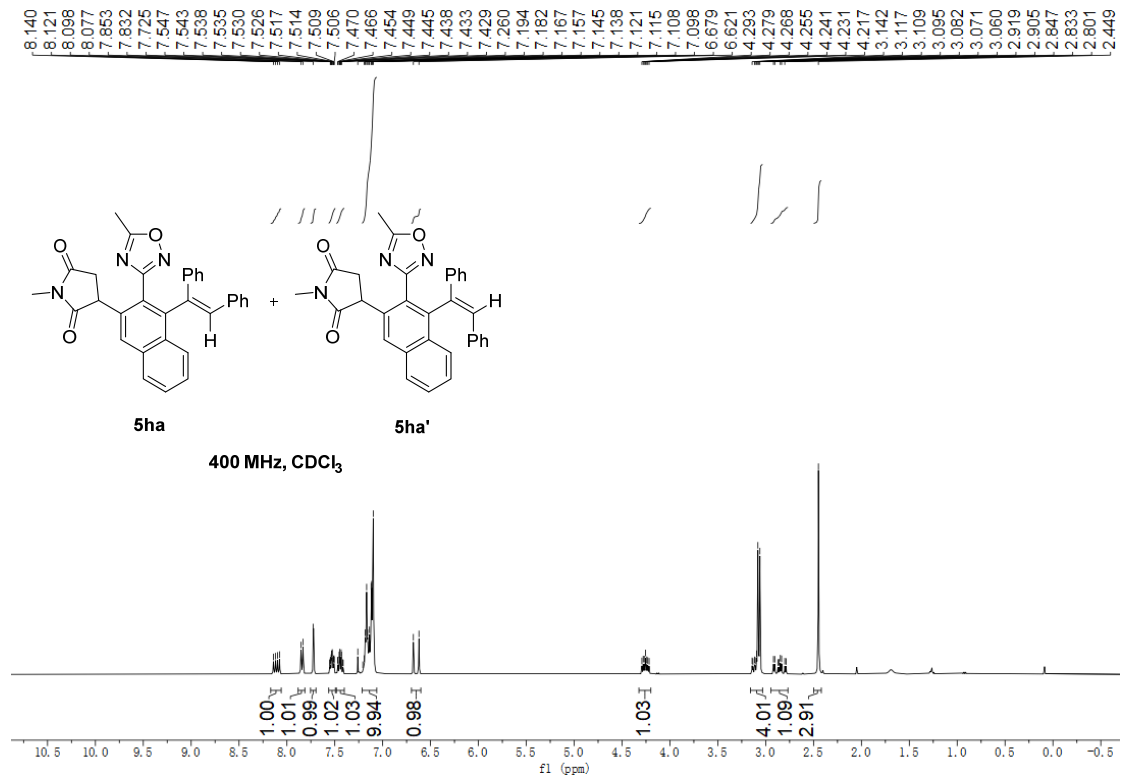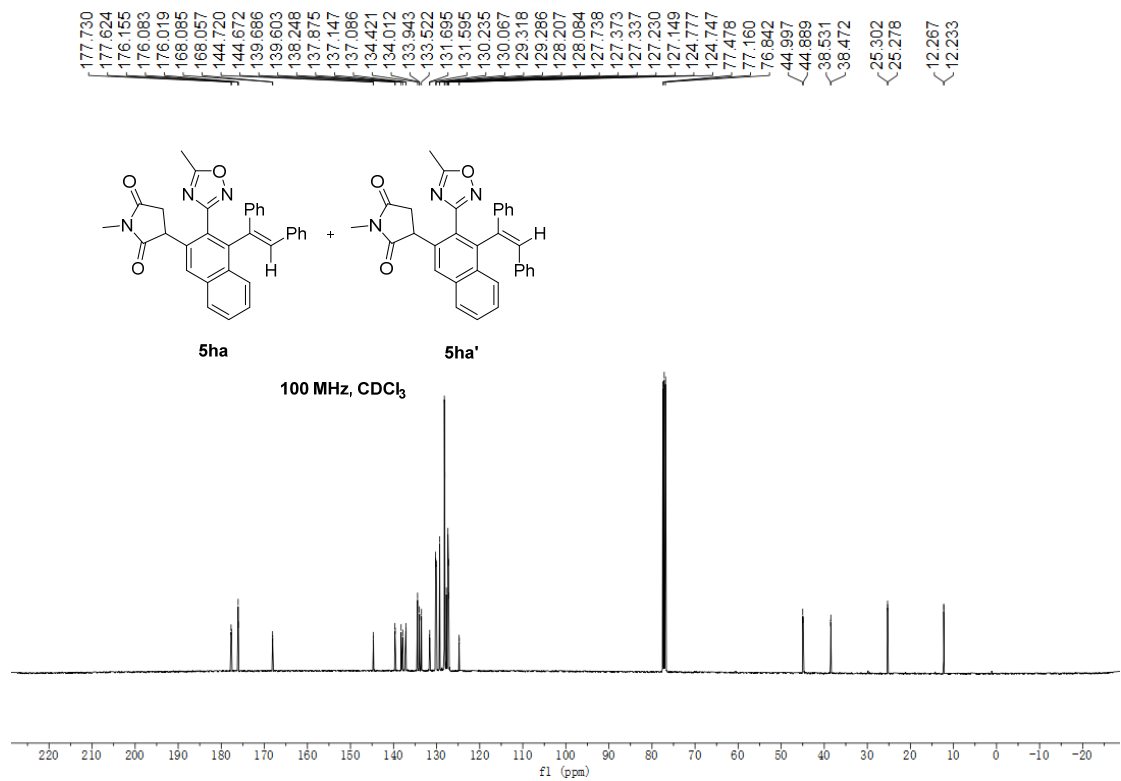

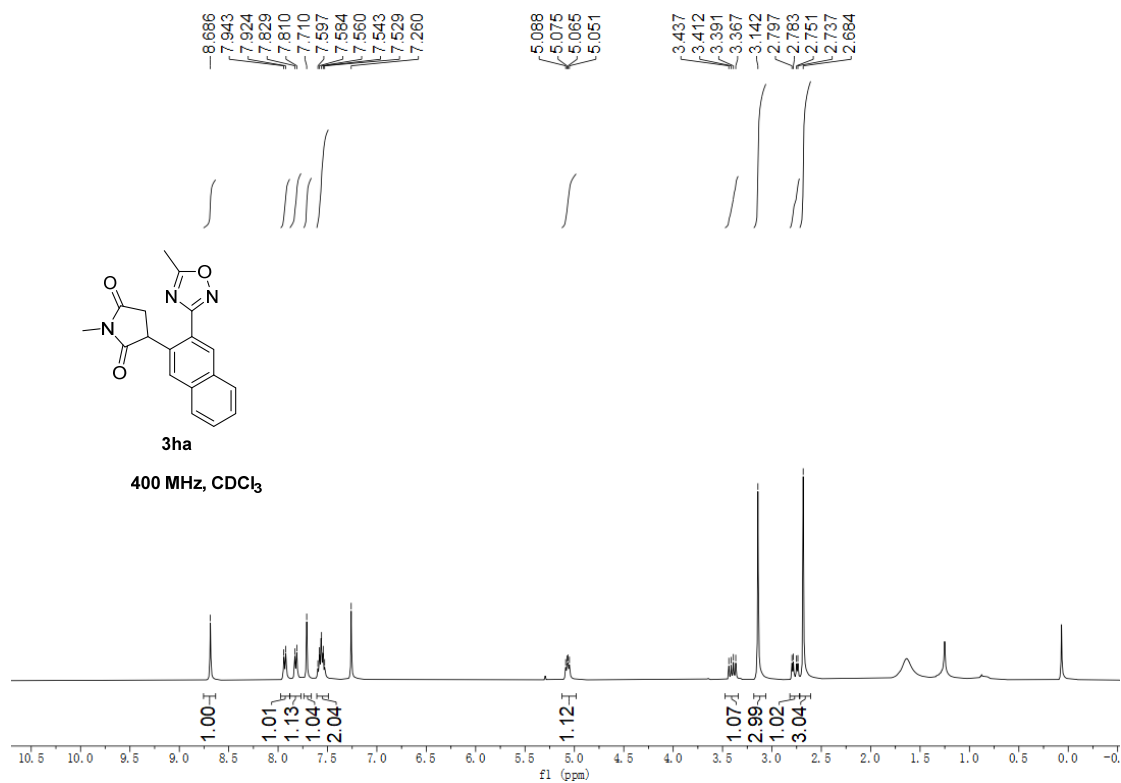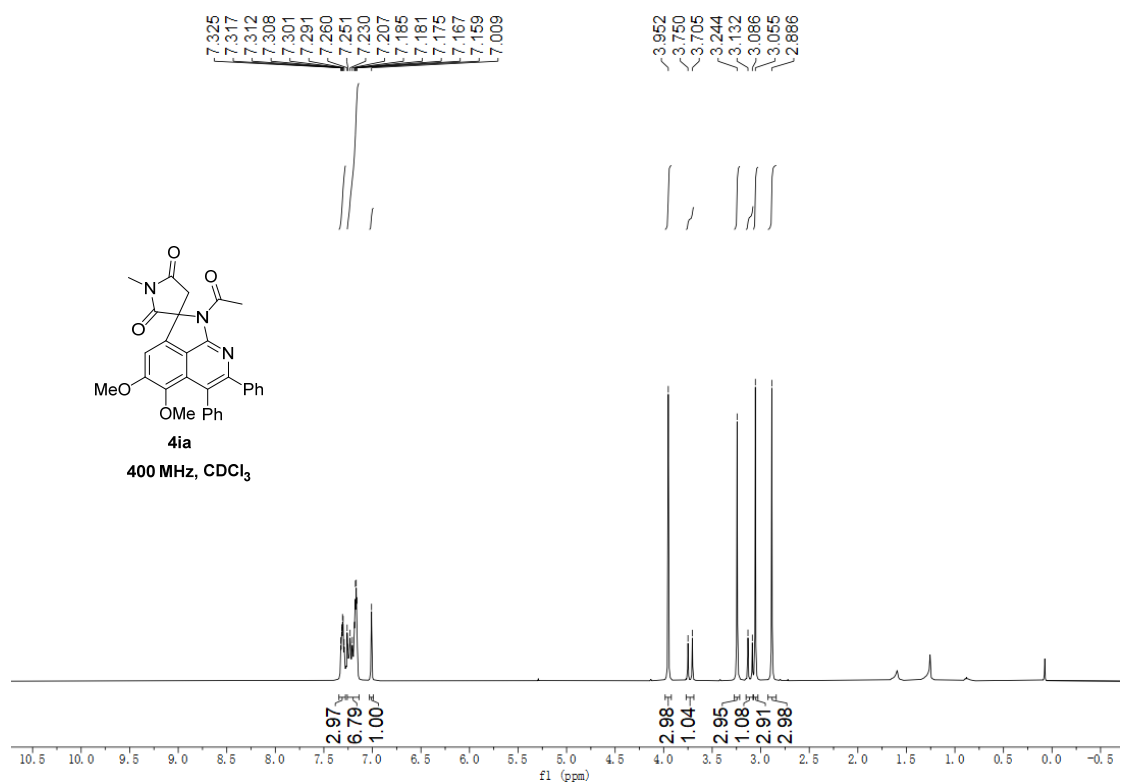



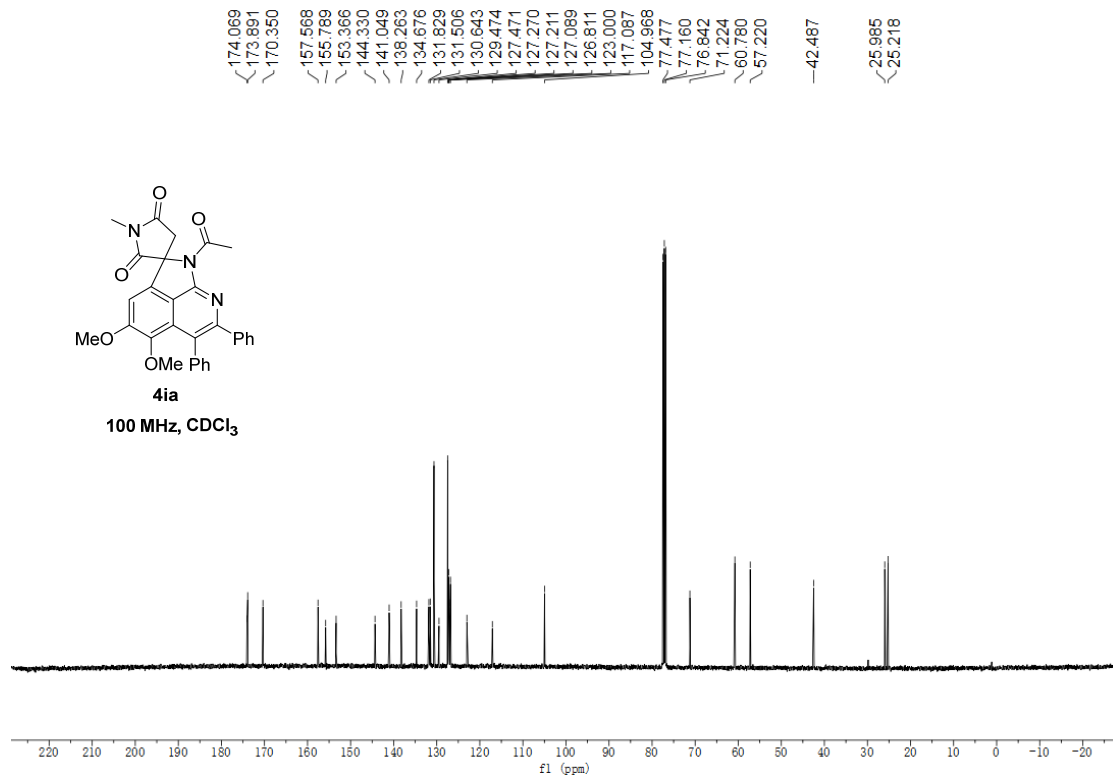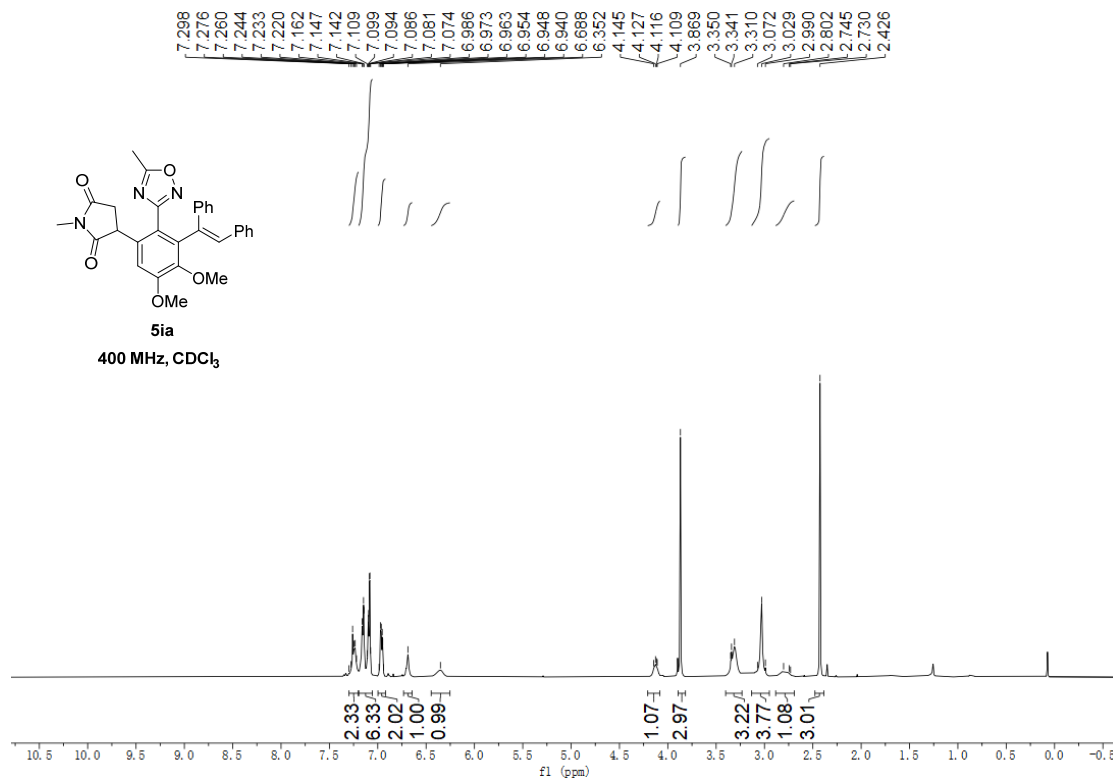

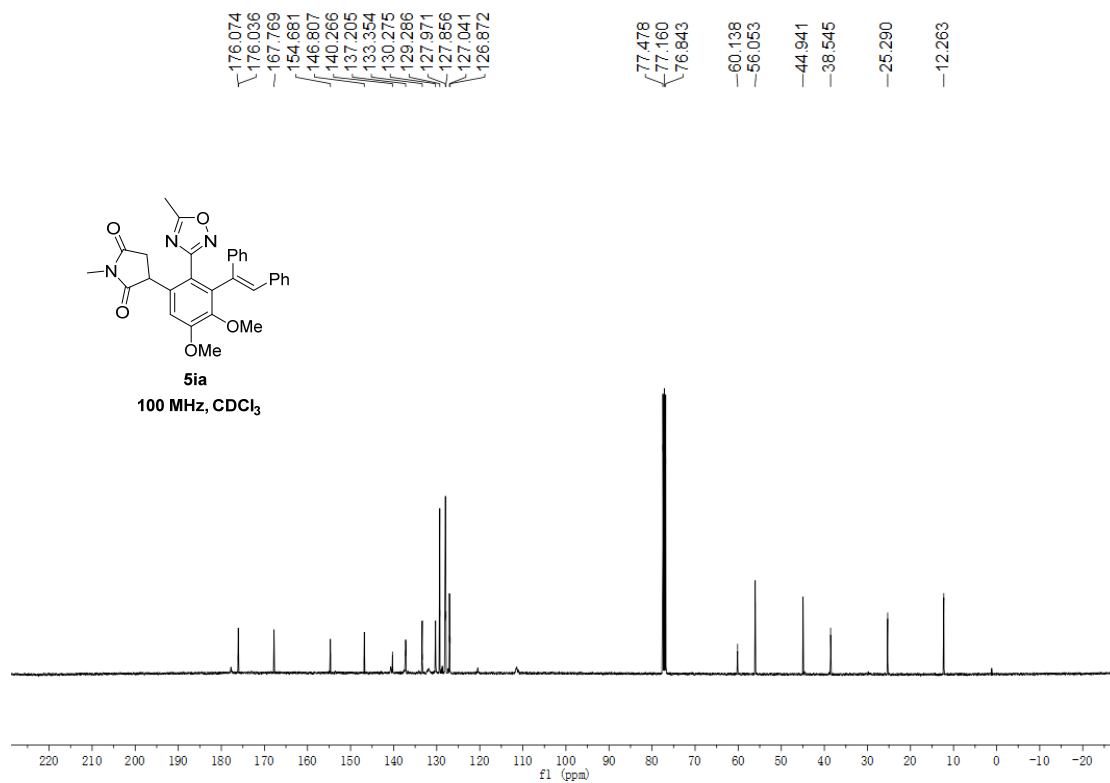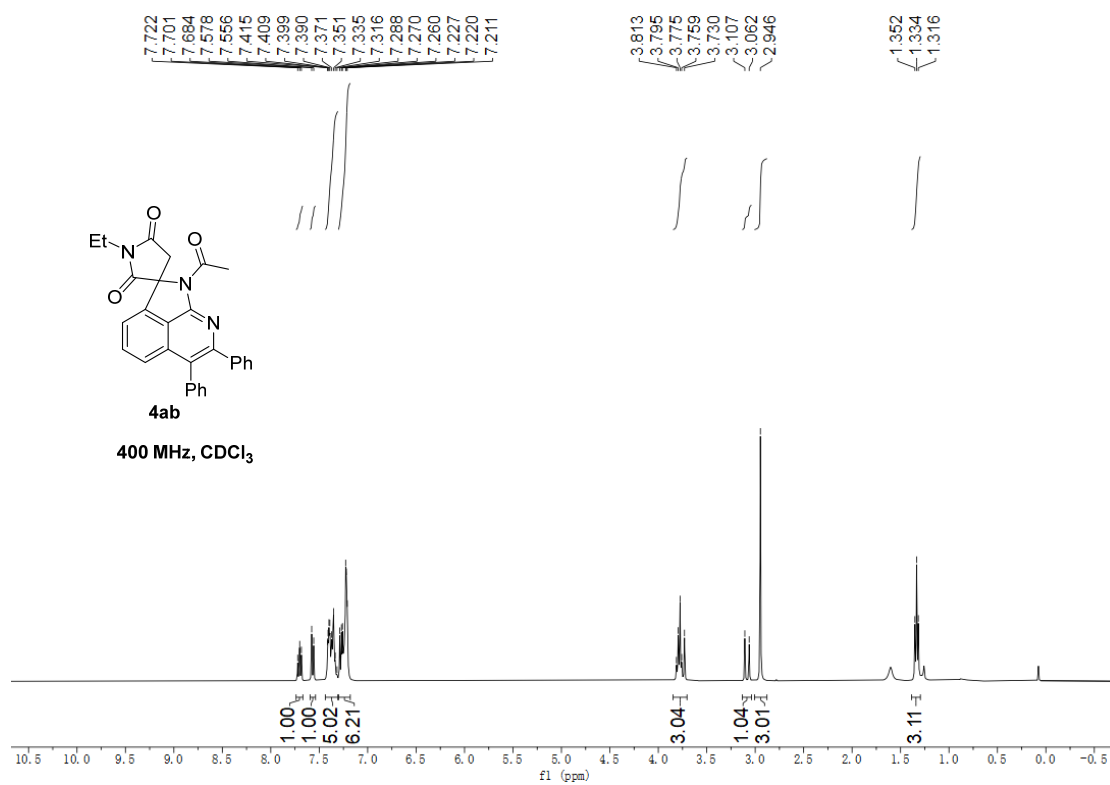

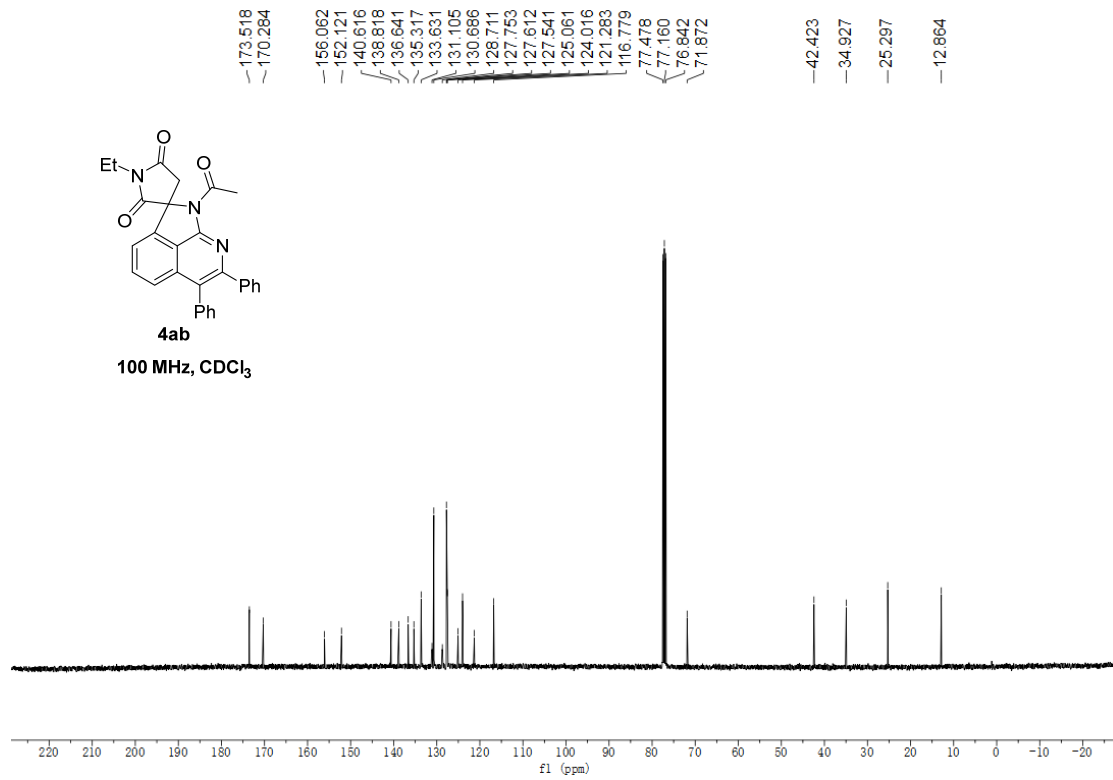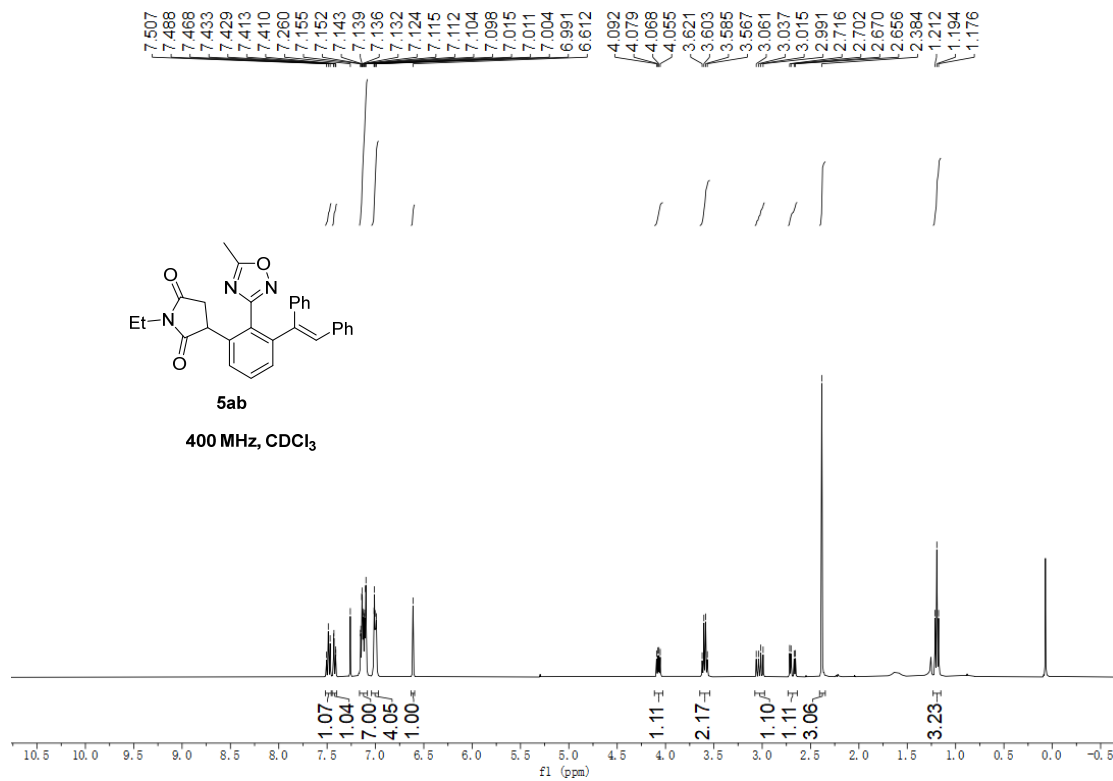

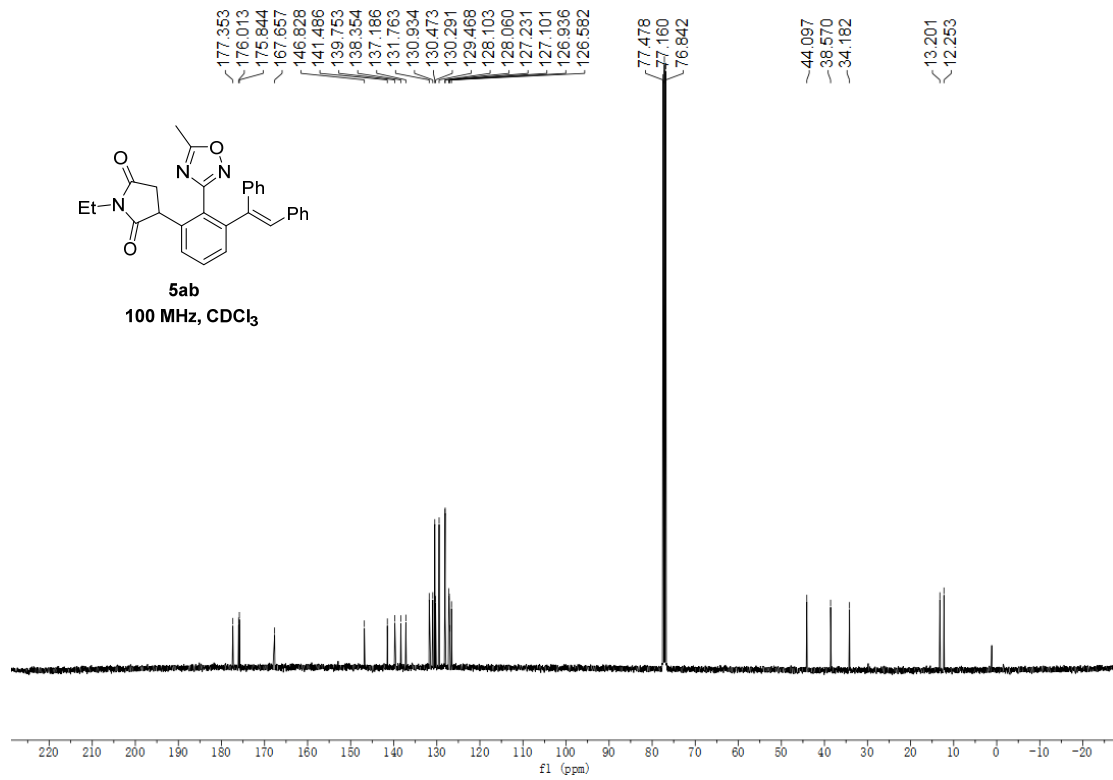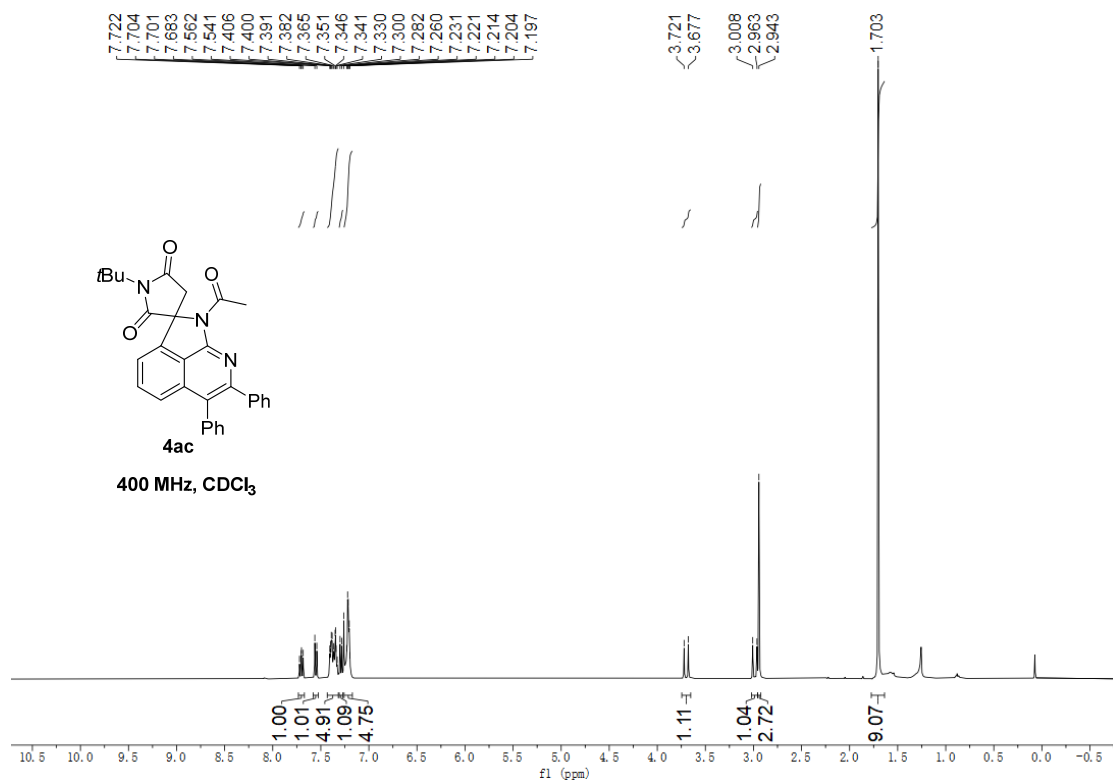

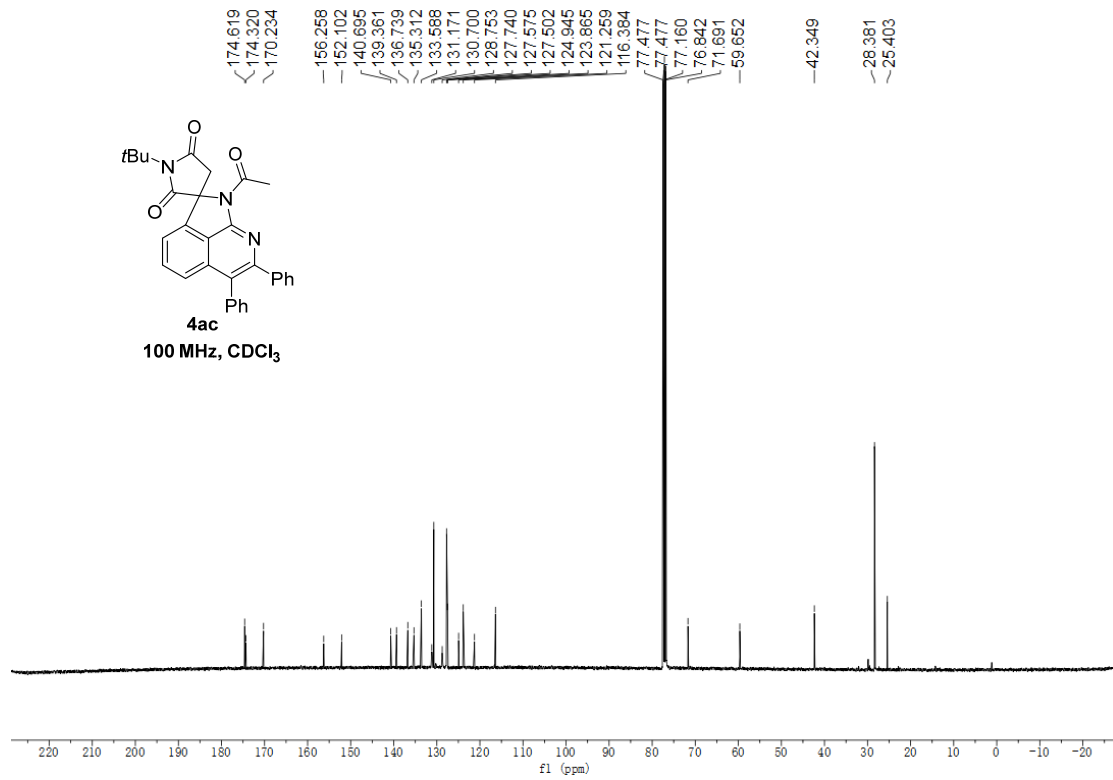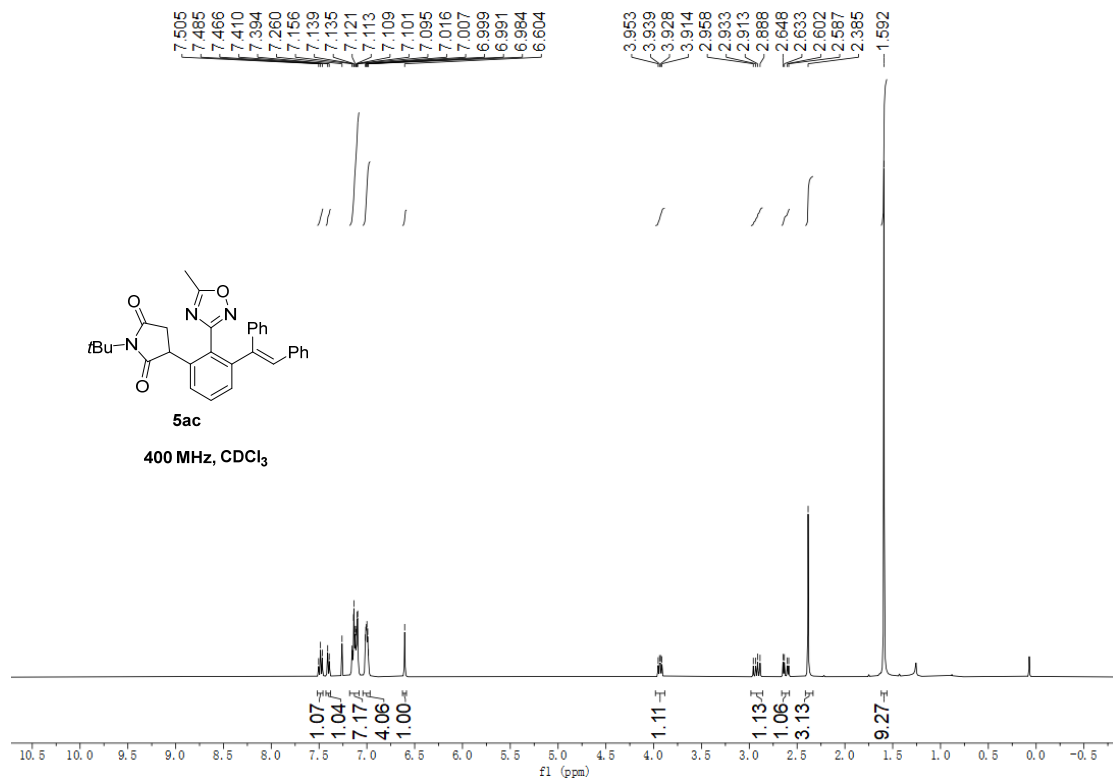

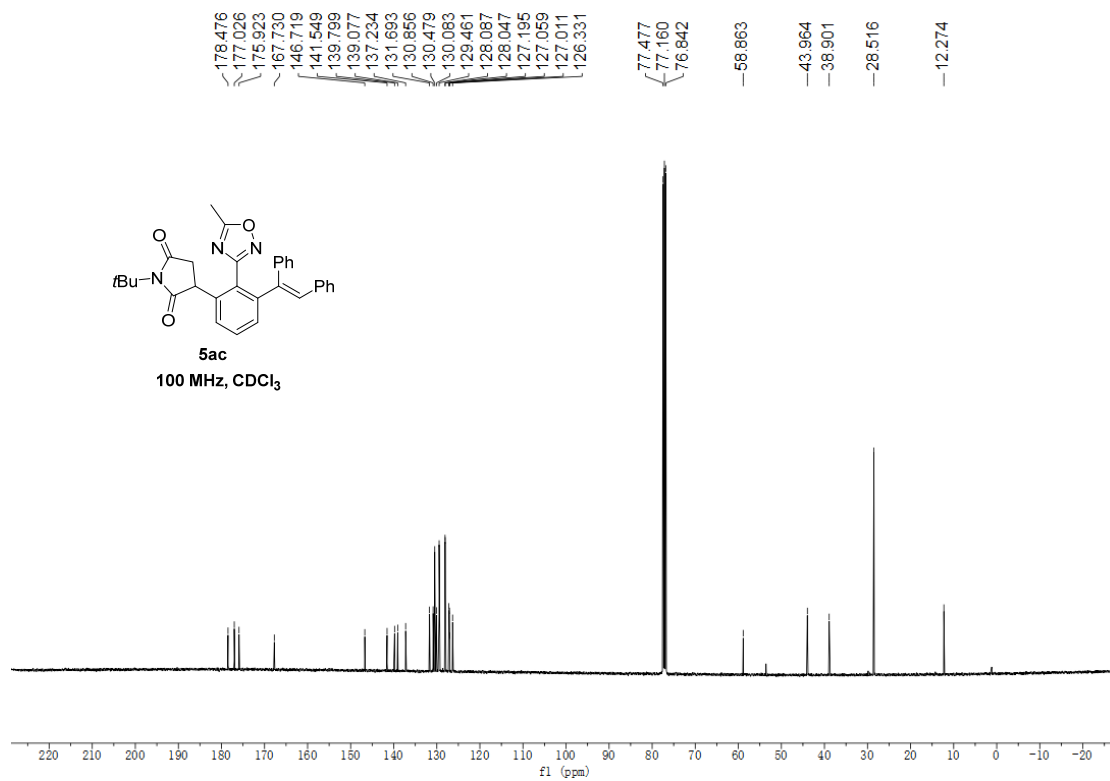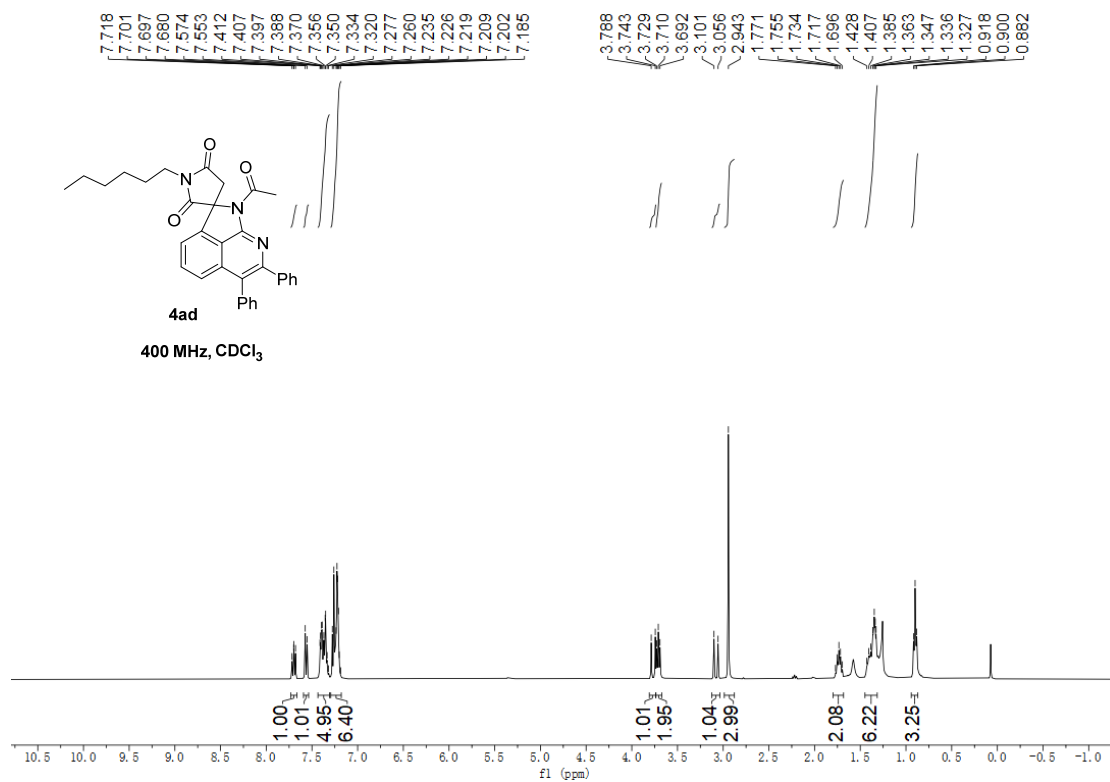

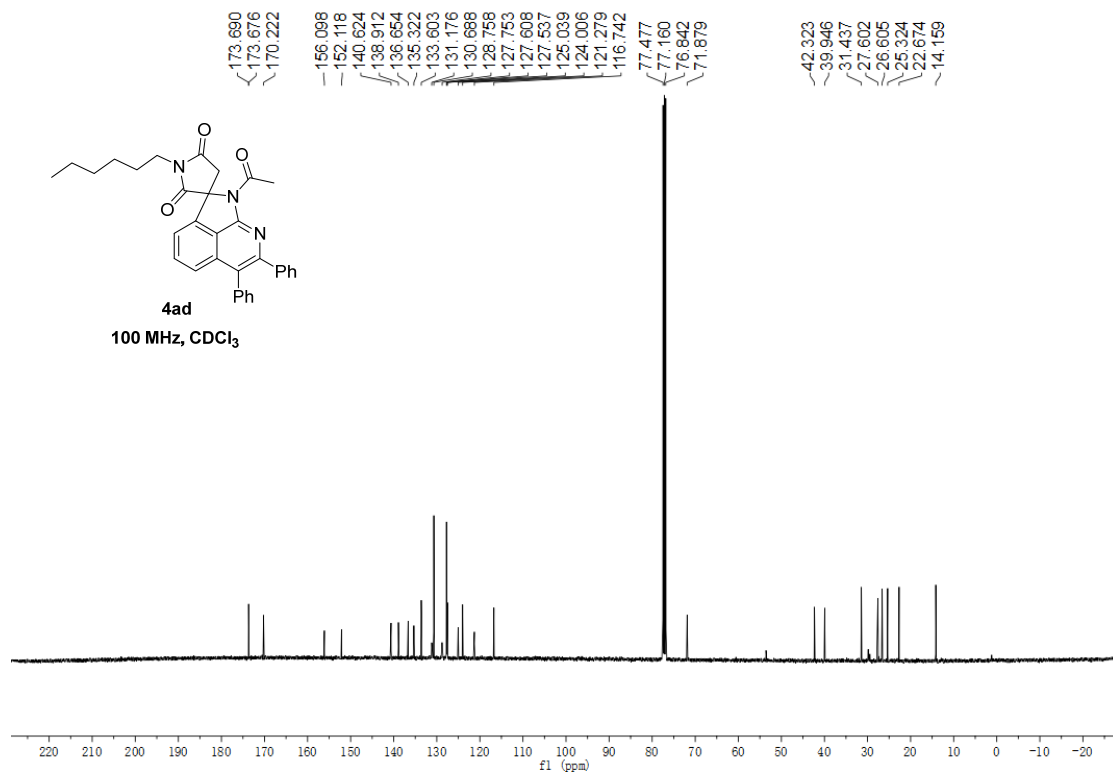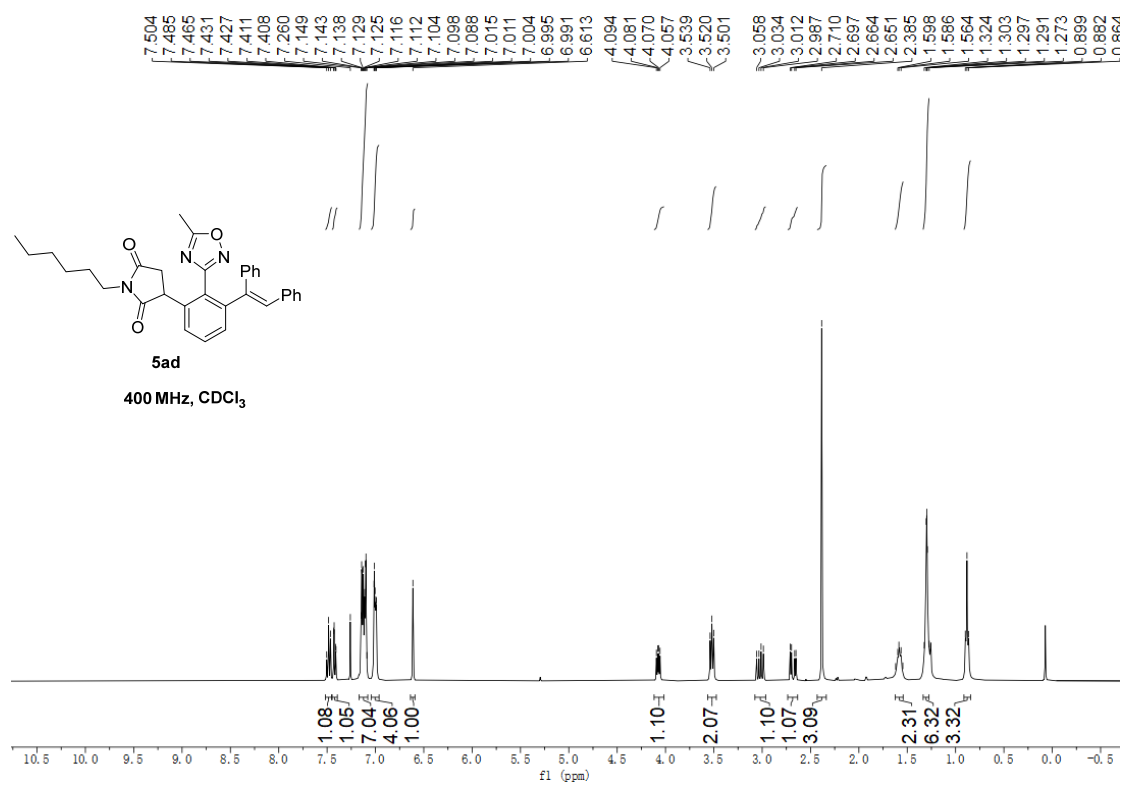

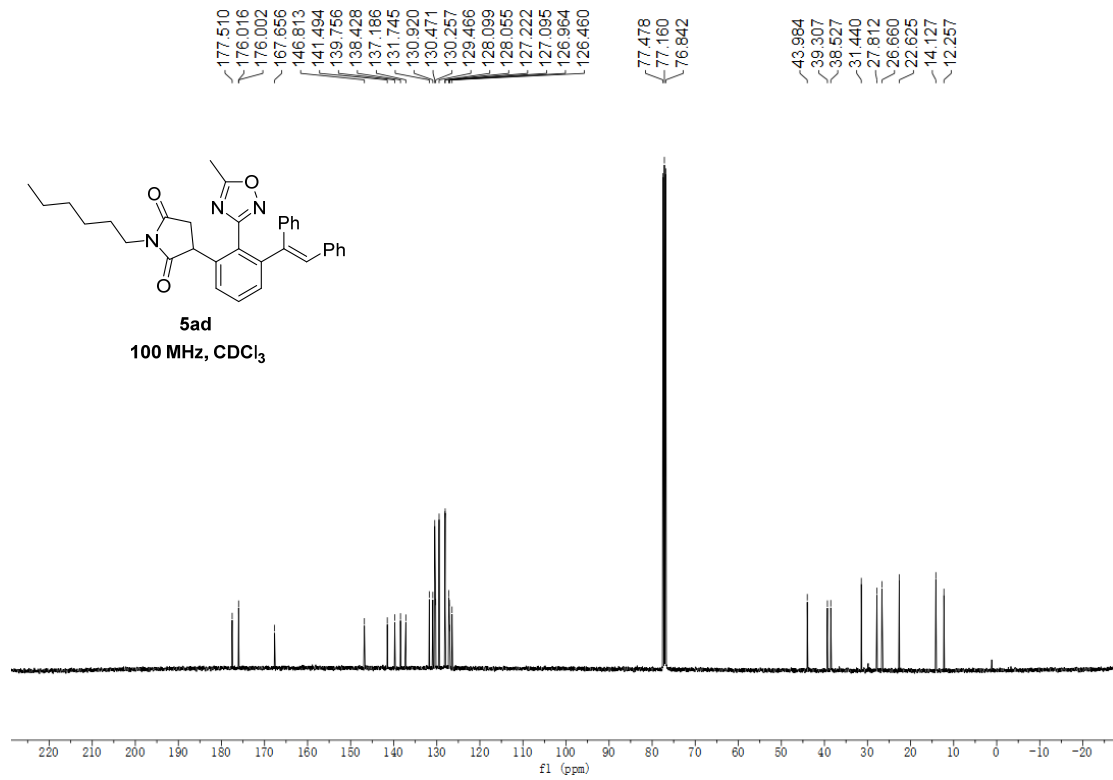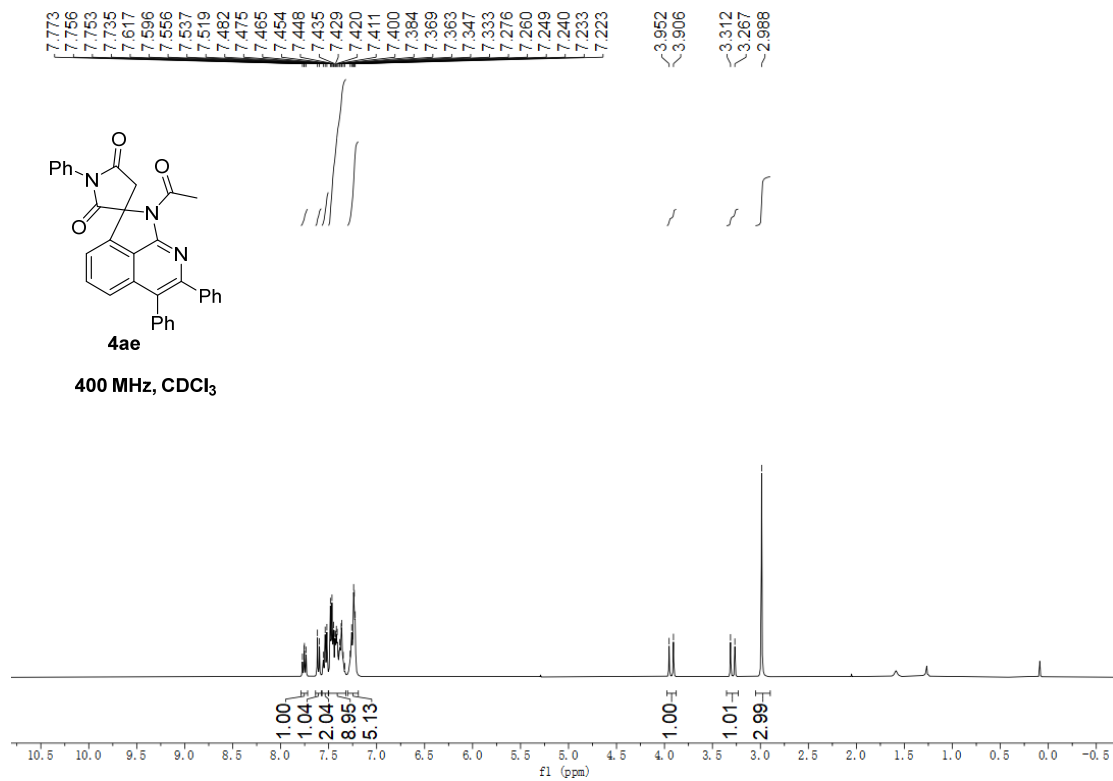



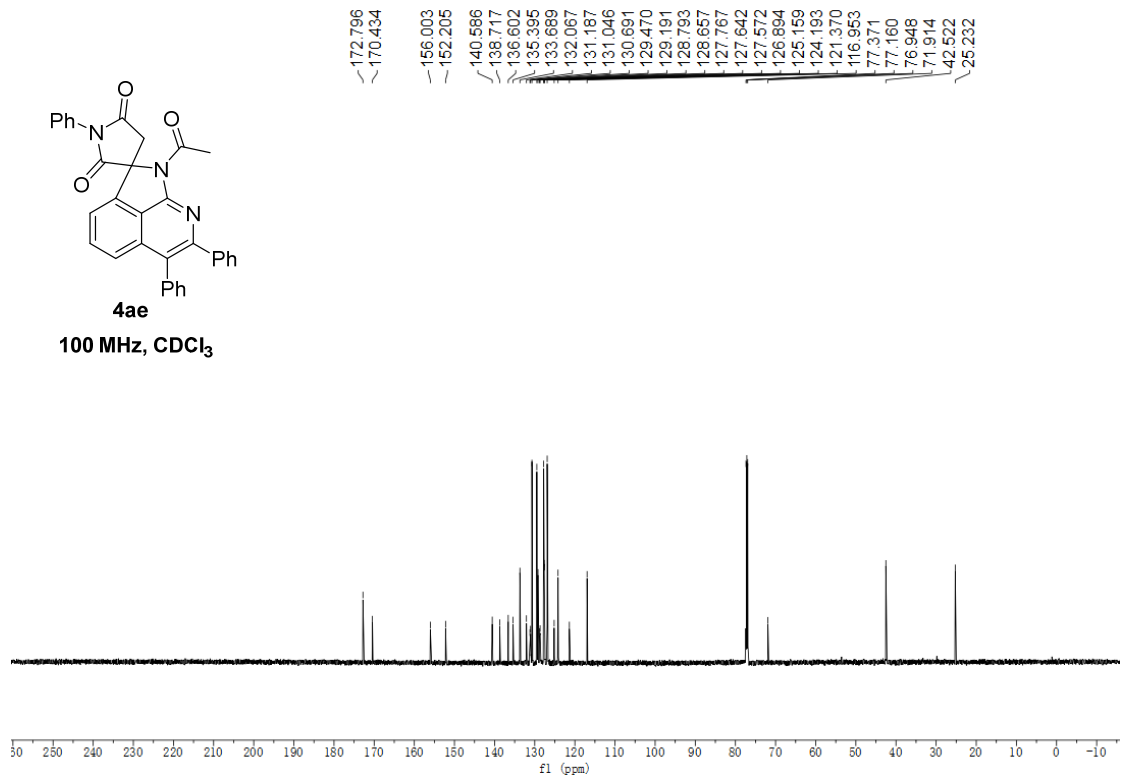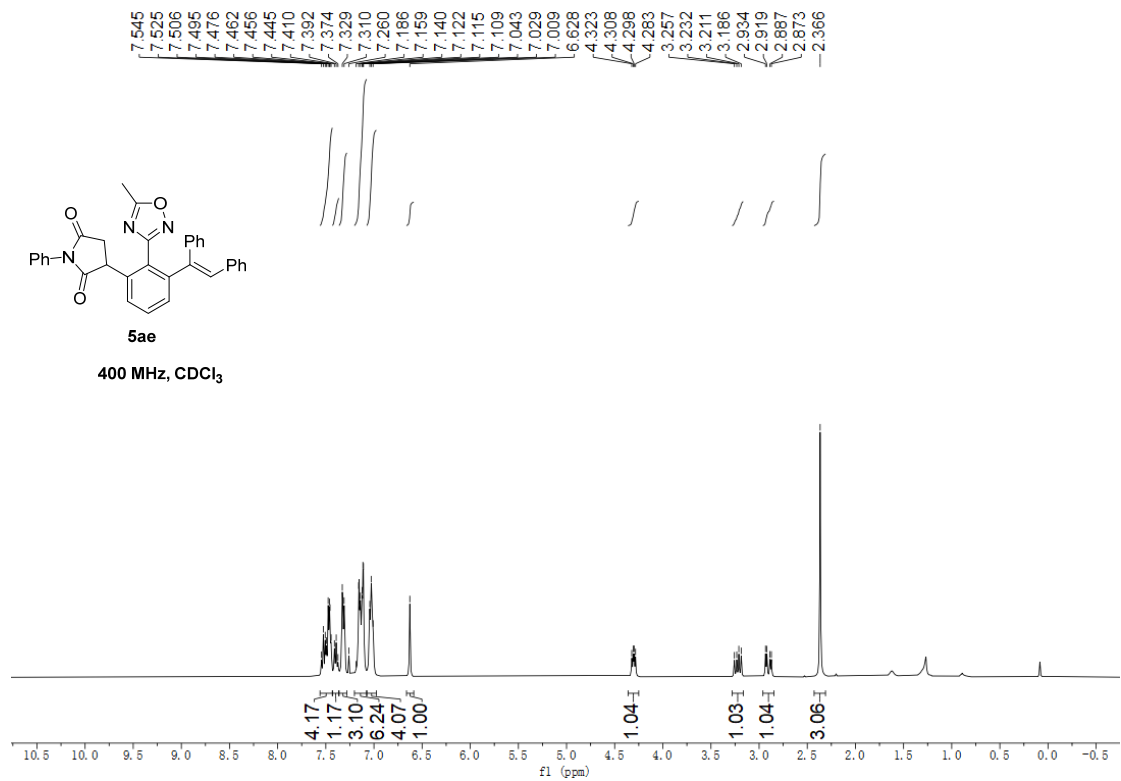

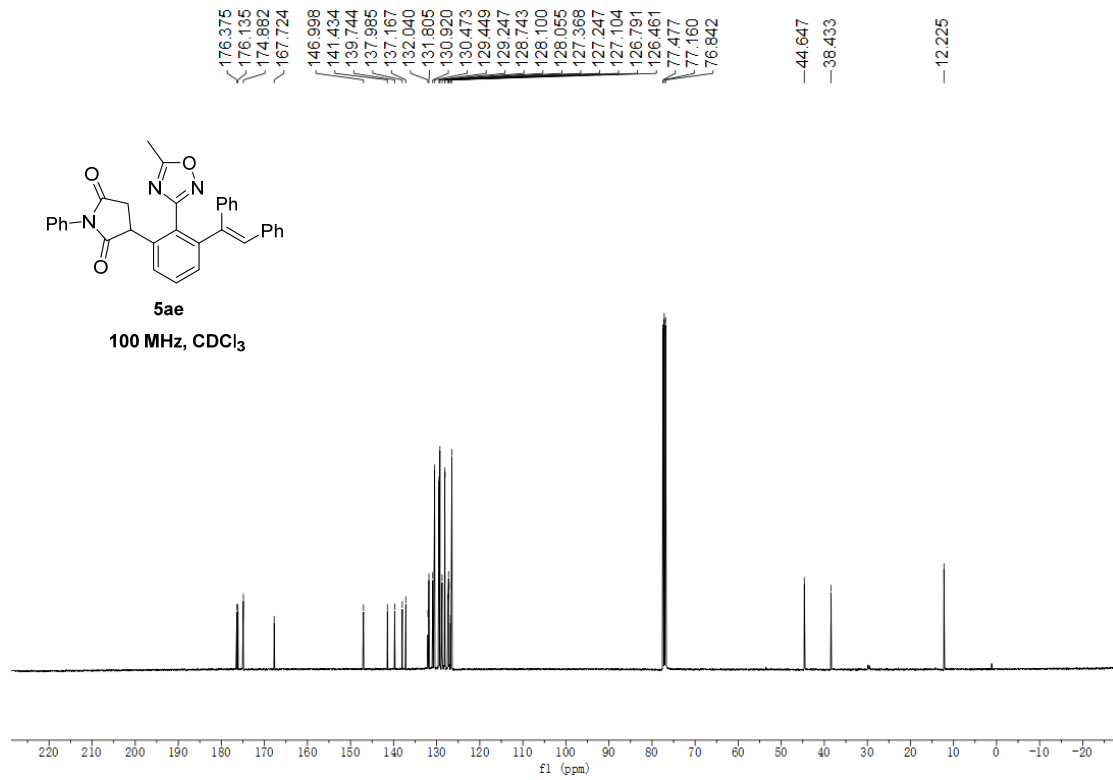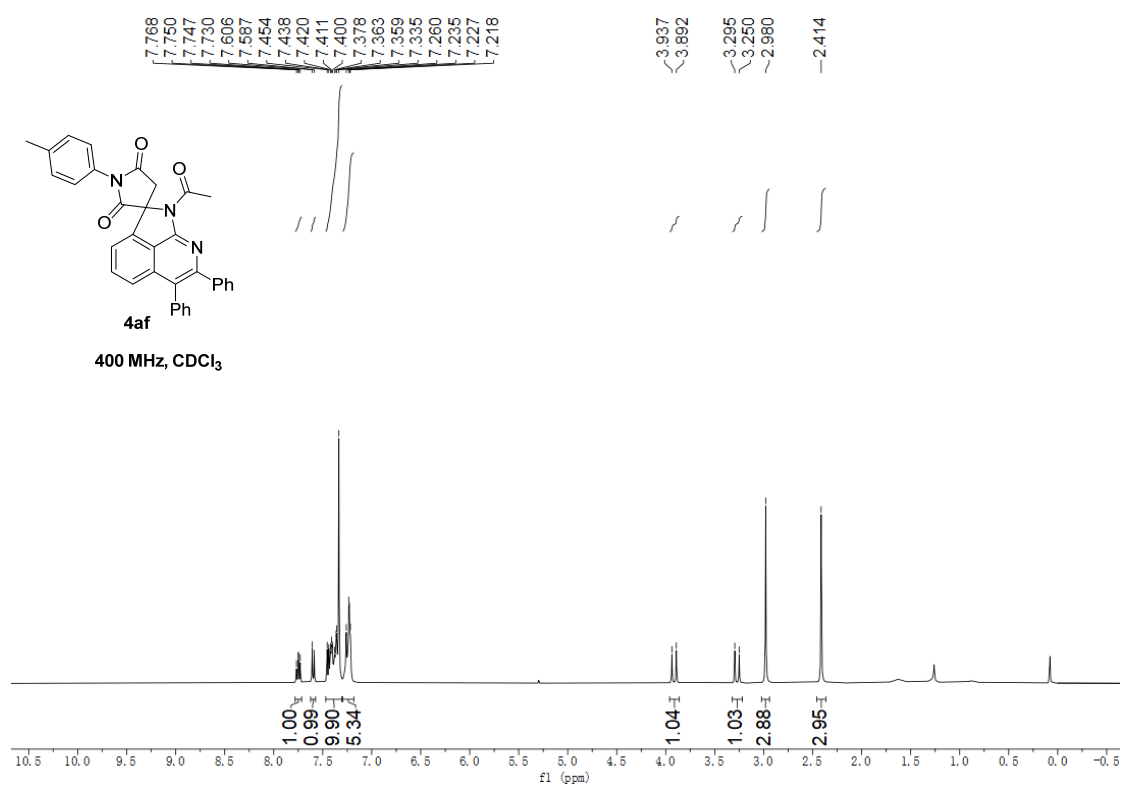

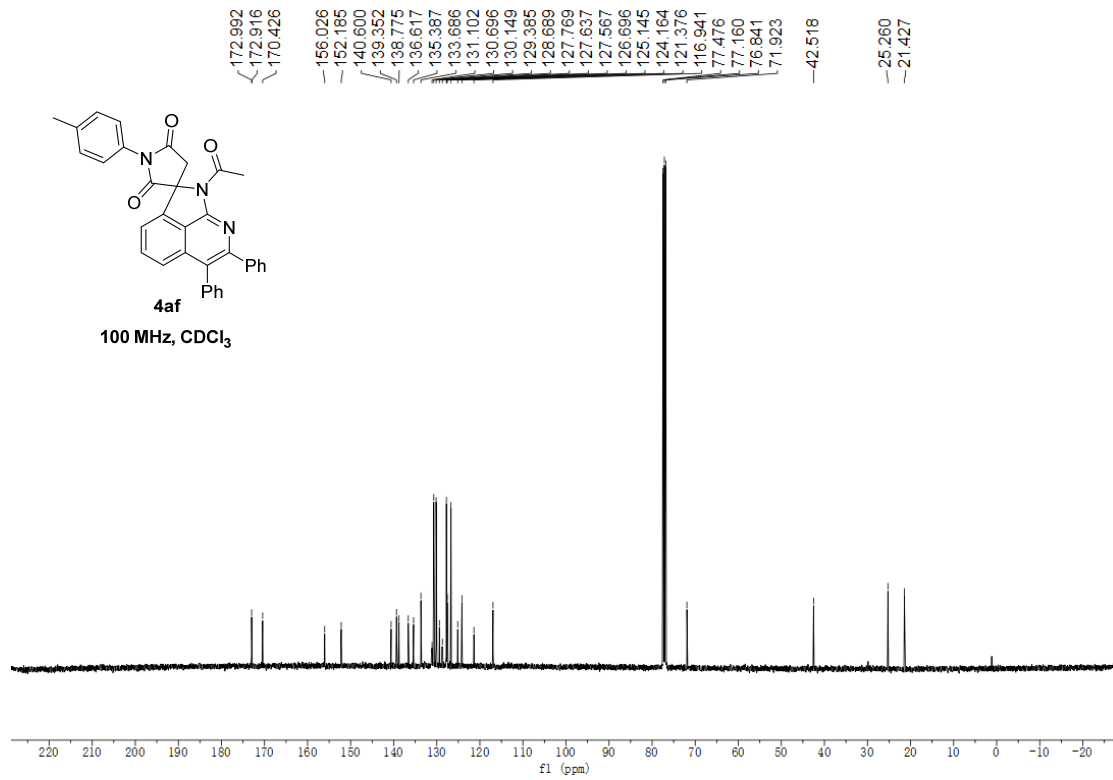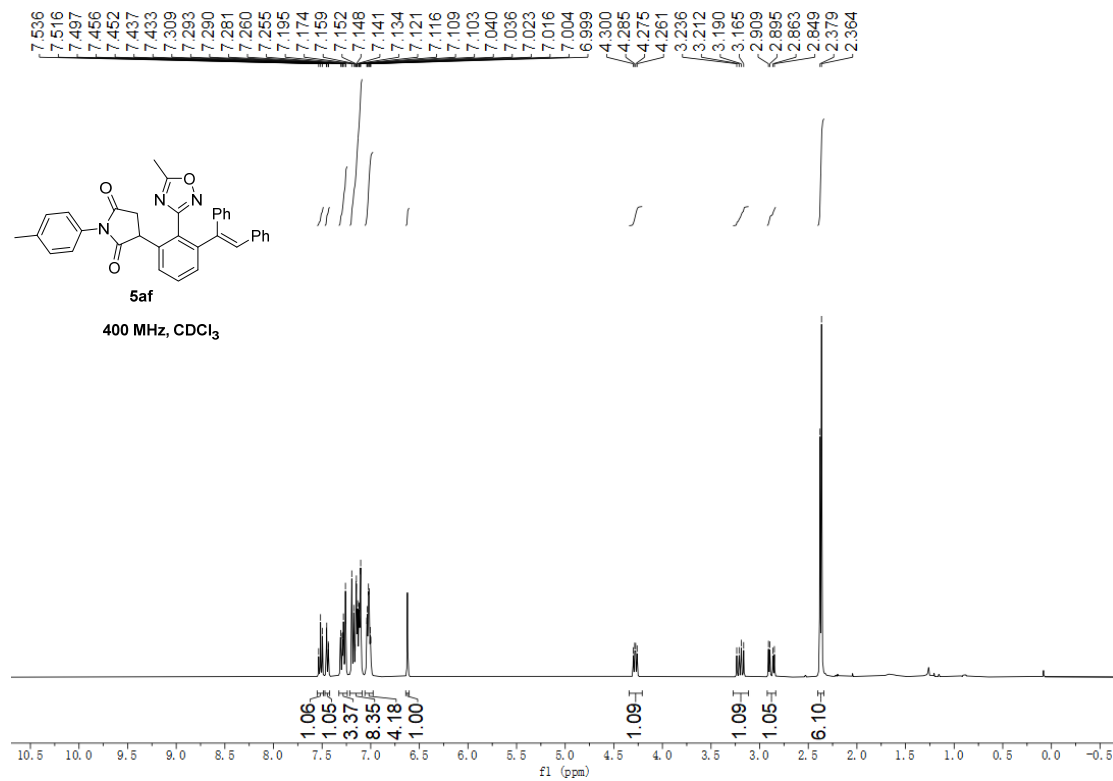

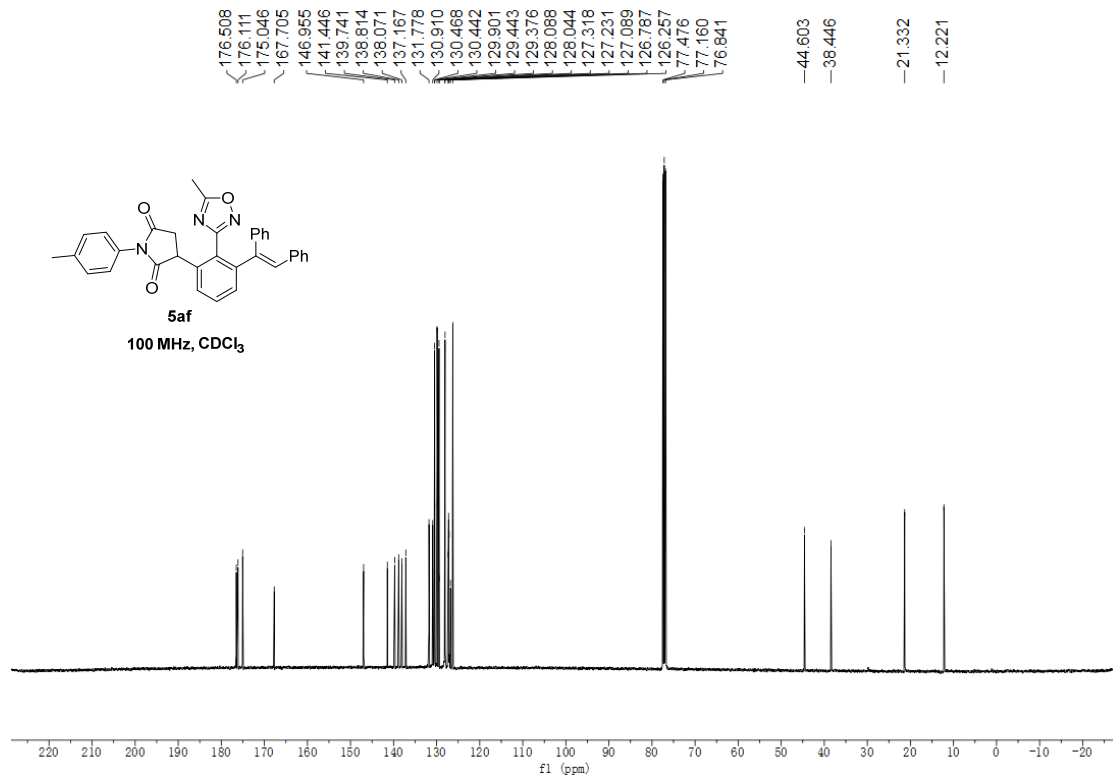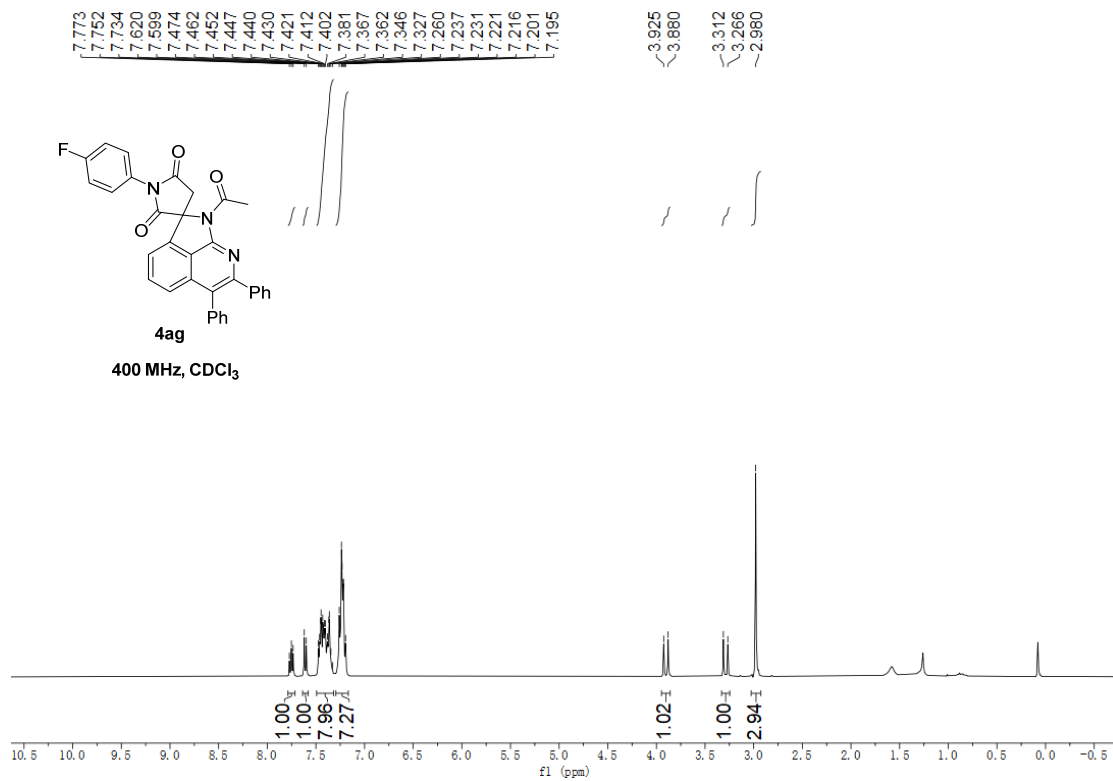

172.858  
172.780  
170.527  
163.943  
161.467  
155.920  
152.247  
140.542  
138.531  
136.553  
135.419  
133.696  
131.086  
130.694  
128.862  
128.774  
127.941  
127.910  
127.792  
127.683  
127.611  
125.219  
124.297  
121.365  
116.960  
116.669  
116.439  
77.478  
77.160  
76.842  
71.821  
42.527

-25.223

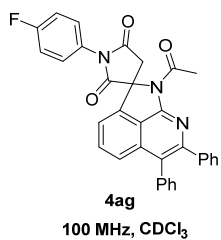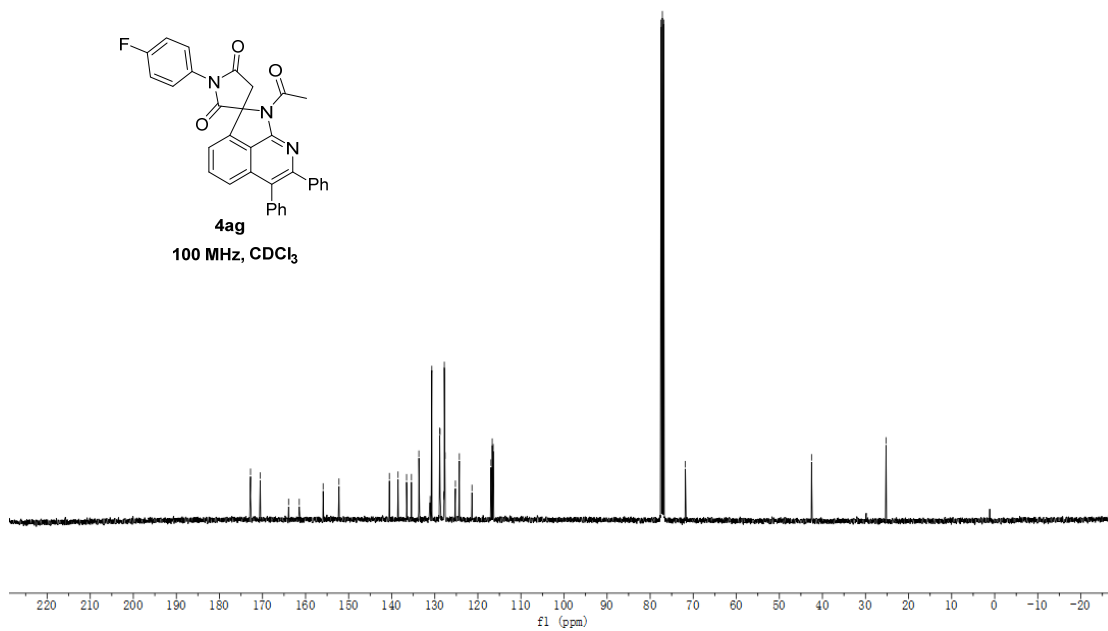

-111.648

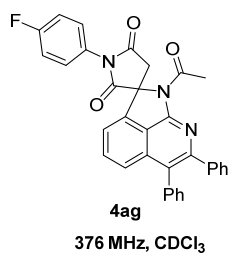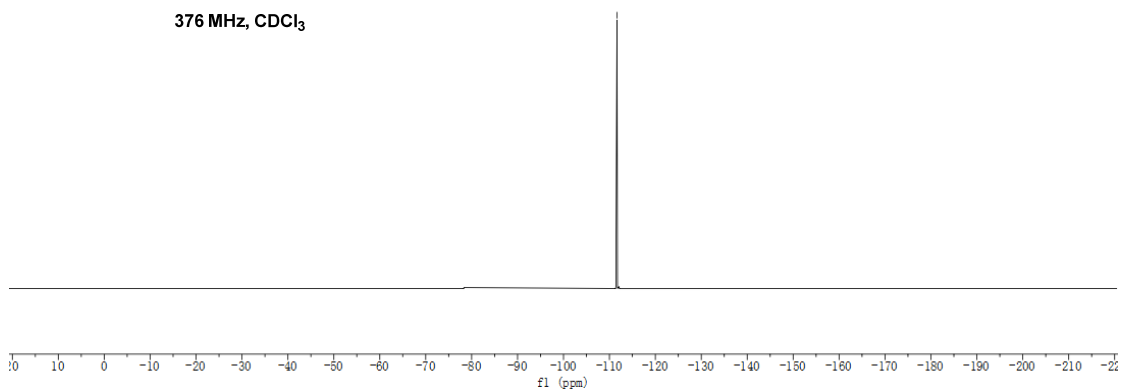

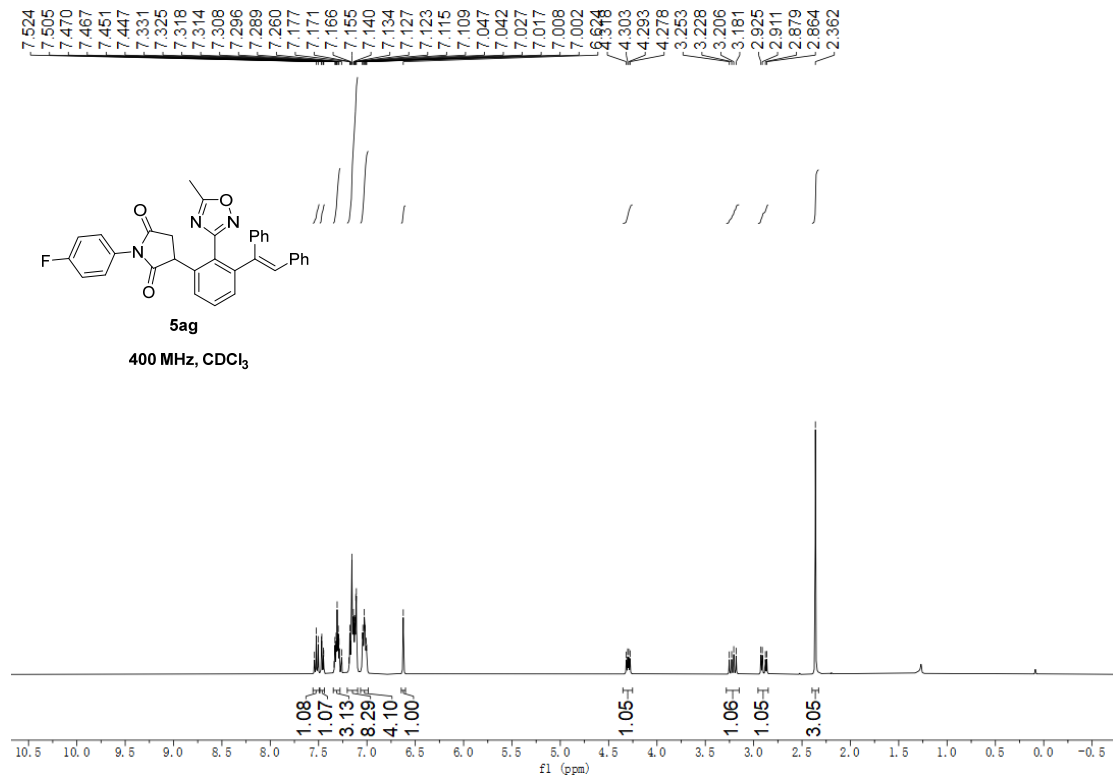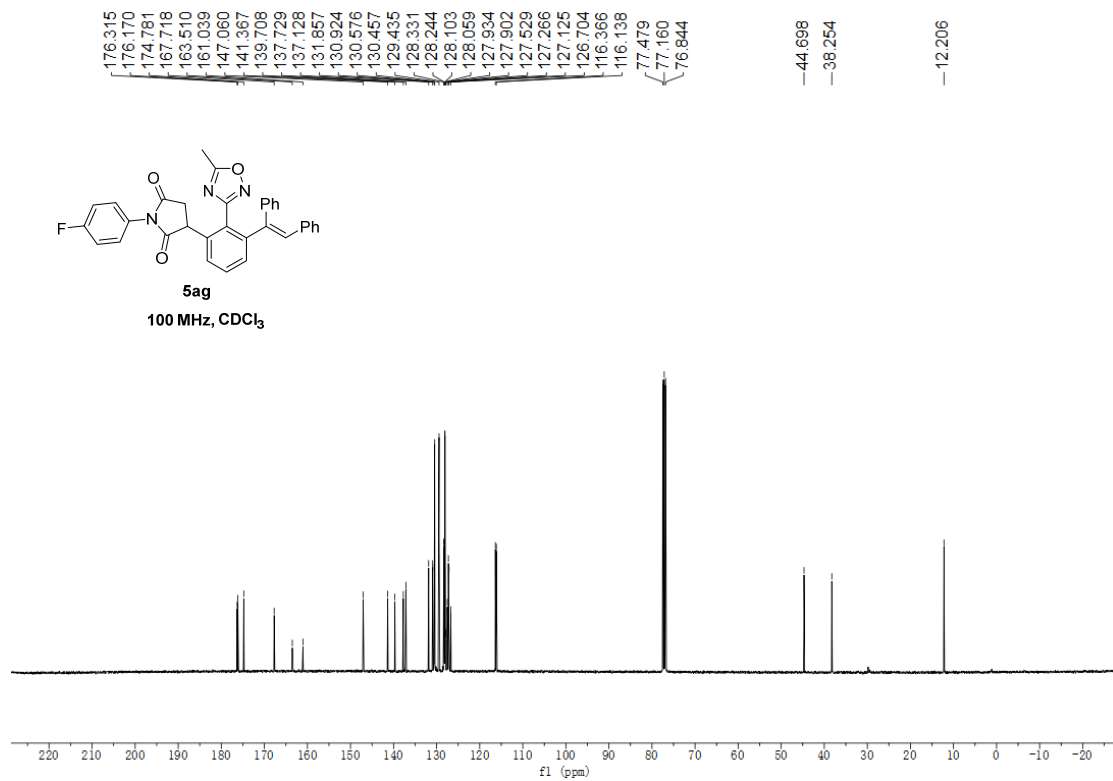

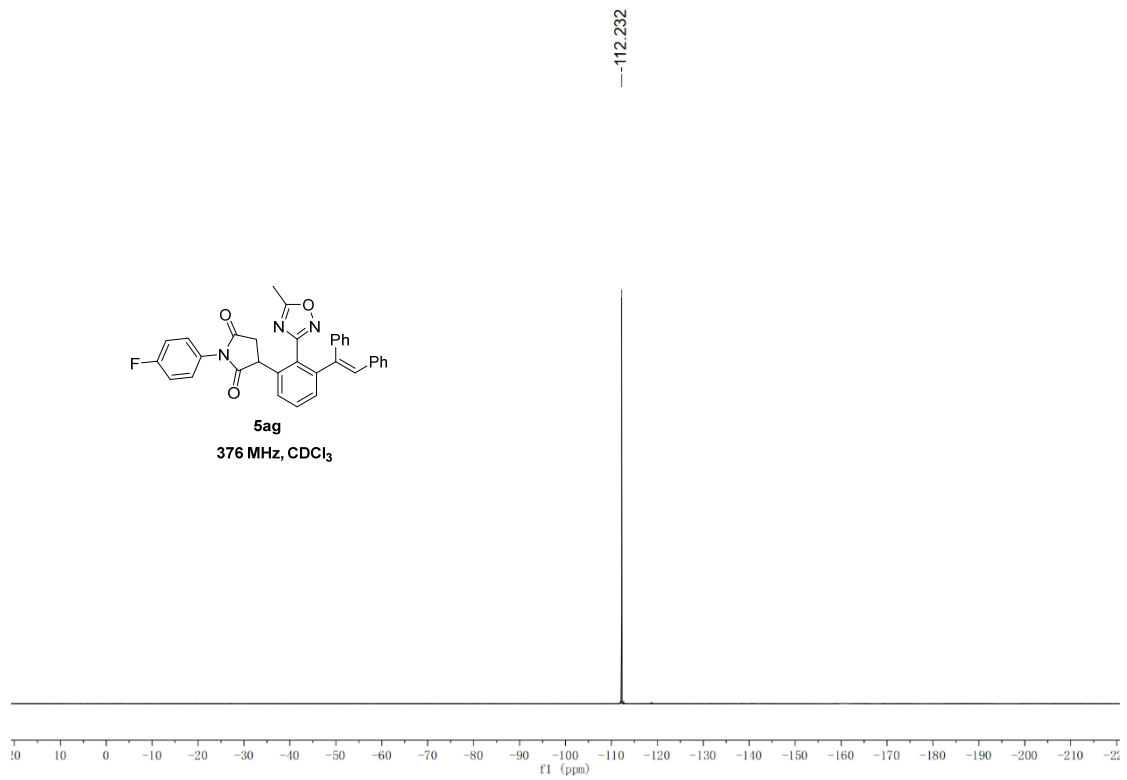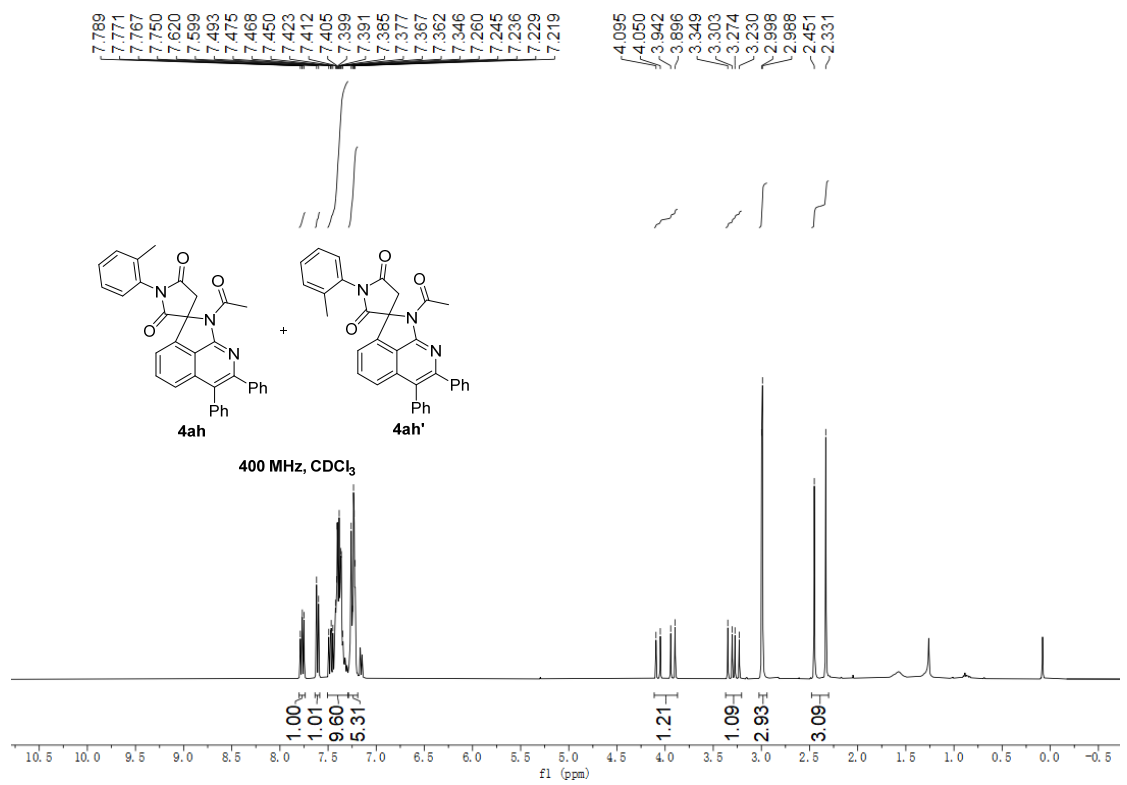

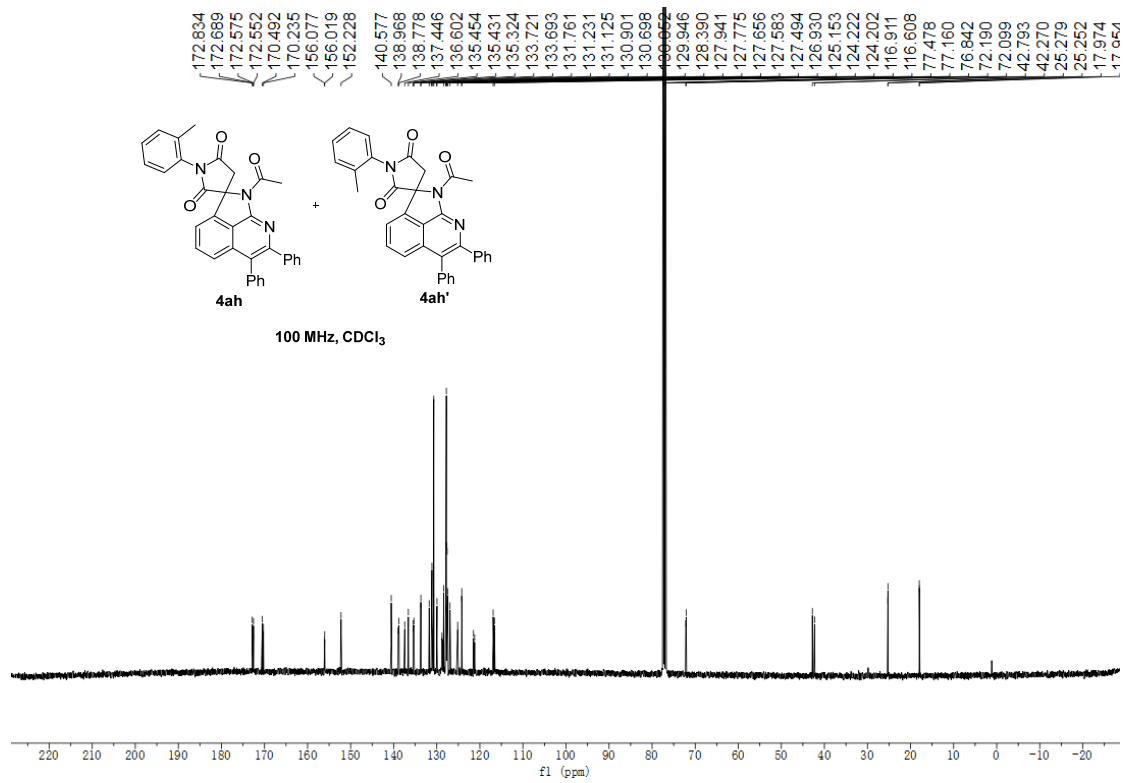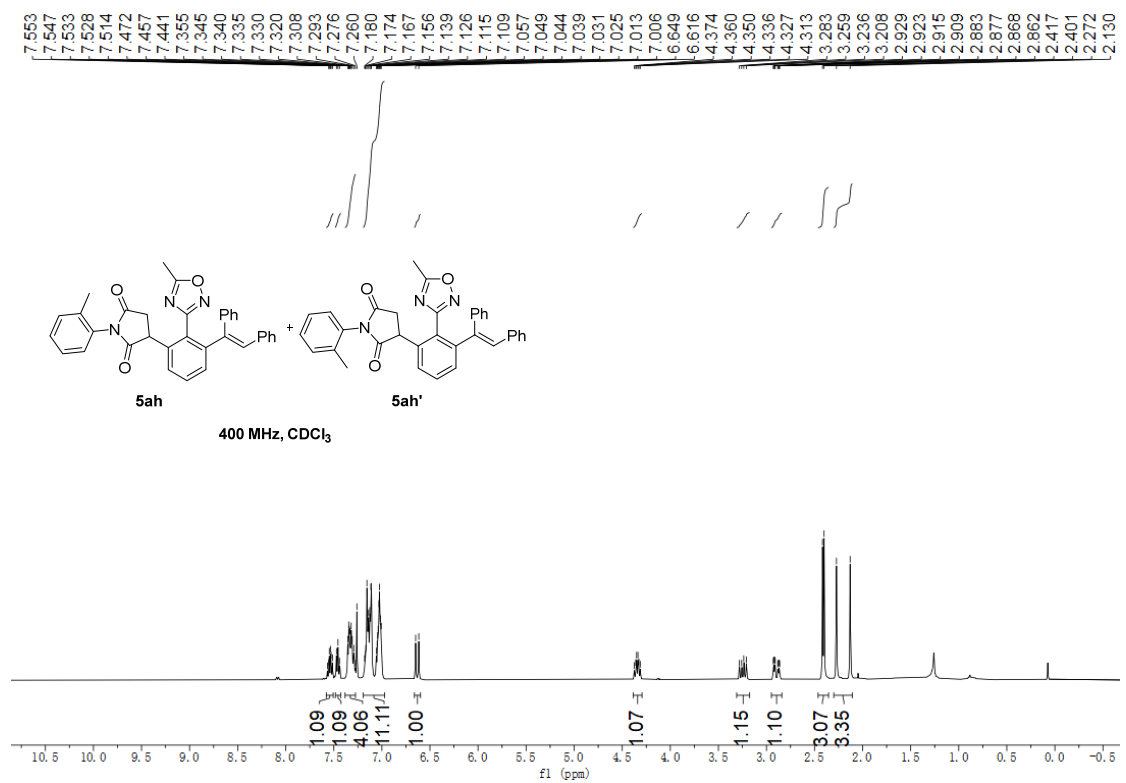



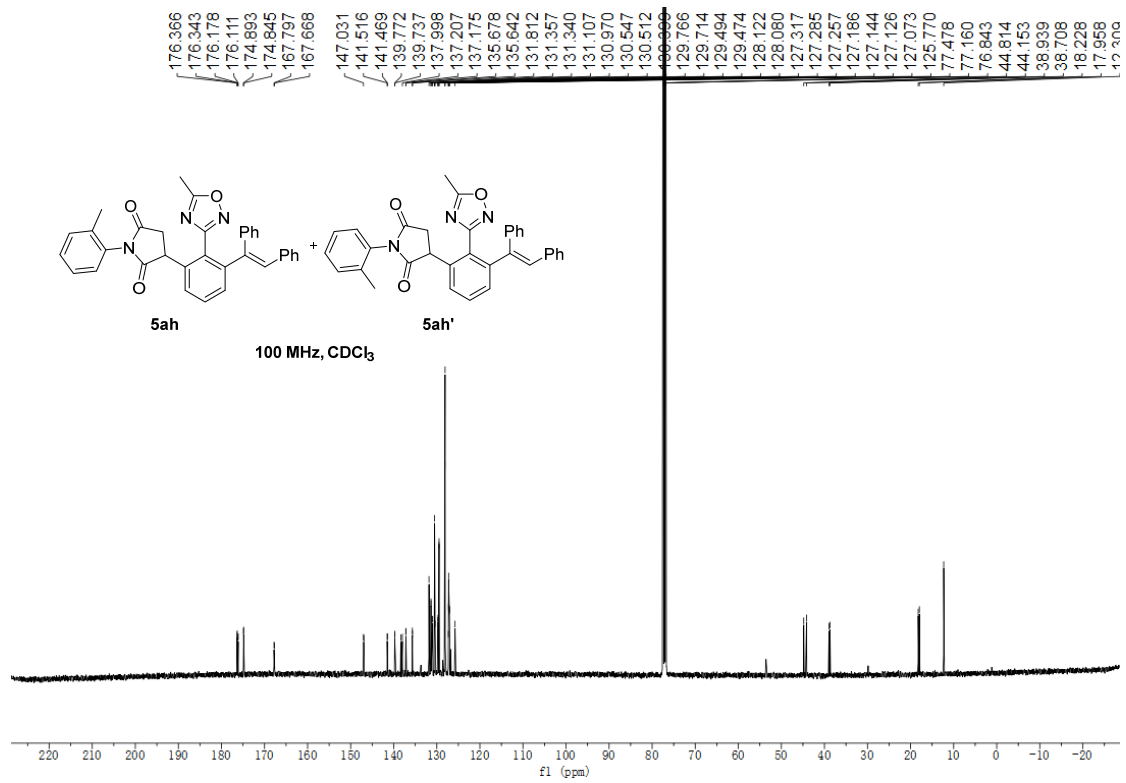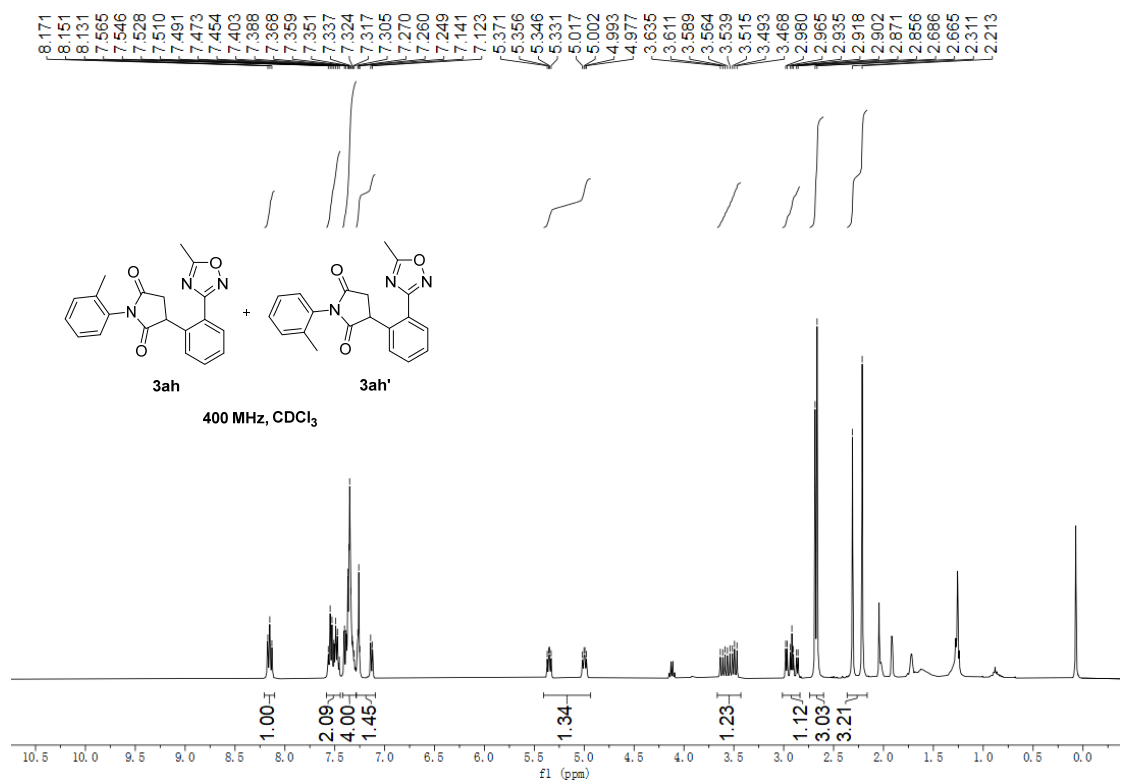

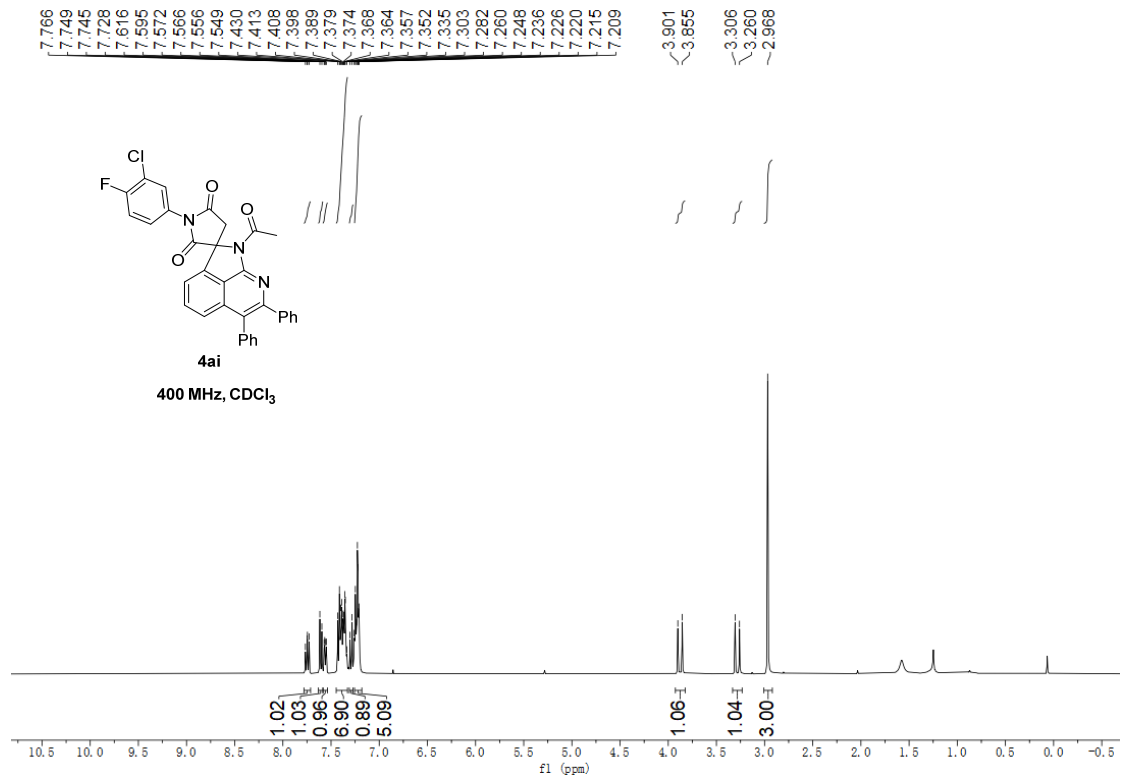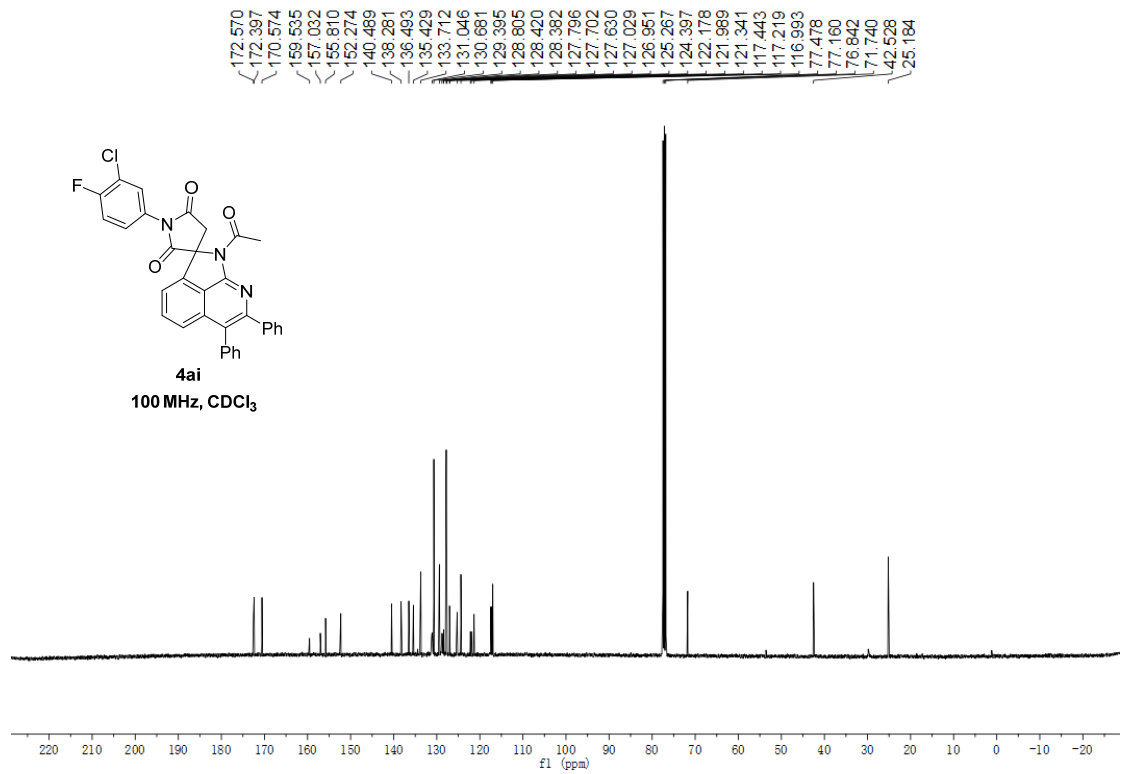

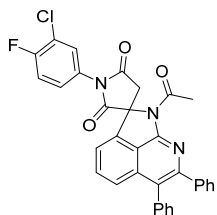

376 MHz, CDCl<sub>3</sub>

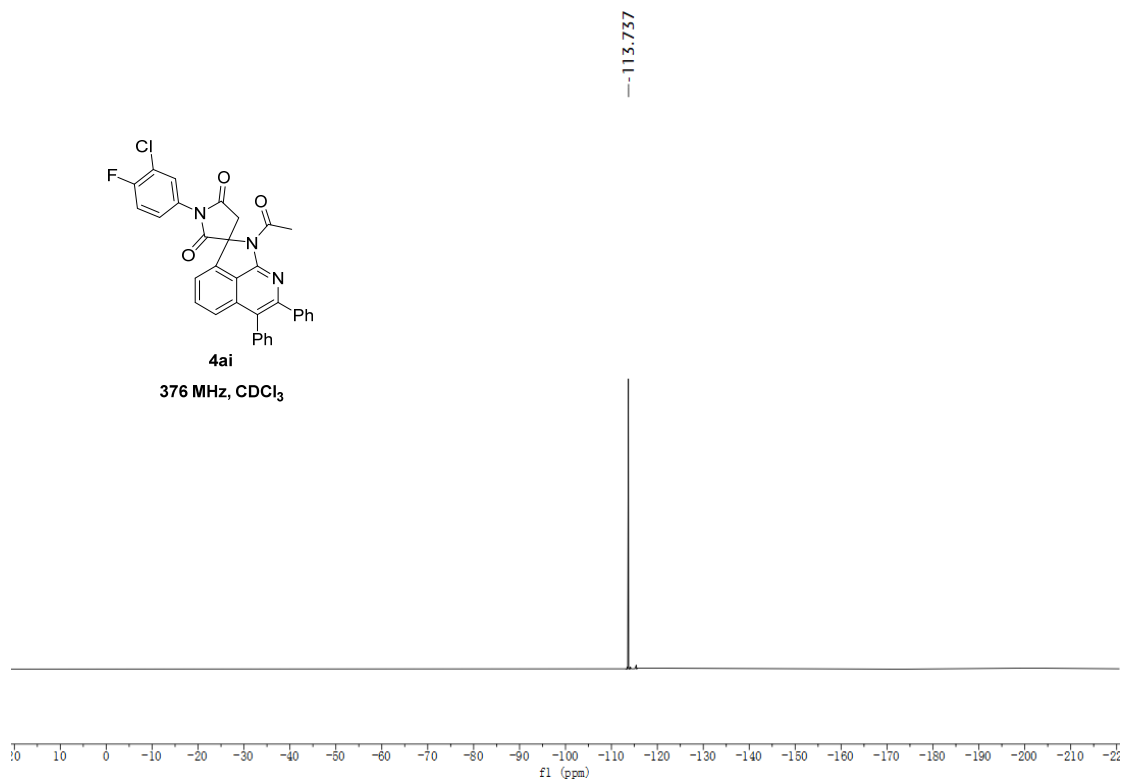

7.548  
7.528  
7.509  
7.473  
7.469  
7.453  
7.450  
7.442  
7.426  
7.421  
7.296  
7.277  
7.273  
7.260  
7.250  
7.248  
7.245  
7.237  
7.232  
7.228  
7.168  
7.164  
7.156  
7.152  
7.145  
7.137  
7.129  
7.124  
7.121  
7.113  
7.107  
7.097  
7.090  
7.039  
7.035  
7.030  
7.020  
7.015  
7.011  
7.000  
6.995  
6.613  
4.316  
4.302  
4.291  
4.277  
3.260  
3.235  
3.213  
3.188  
2.937  
2.922  
2.890  
2.876  
2.365

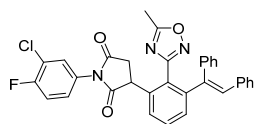

400 MHz, CDCl<sub>3</sub>

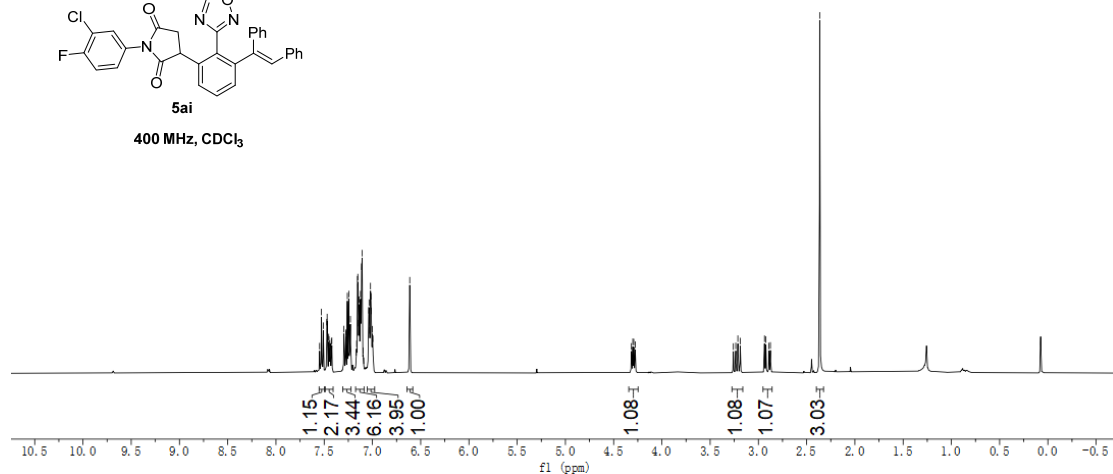

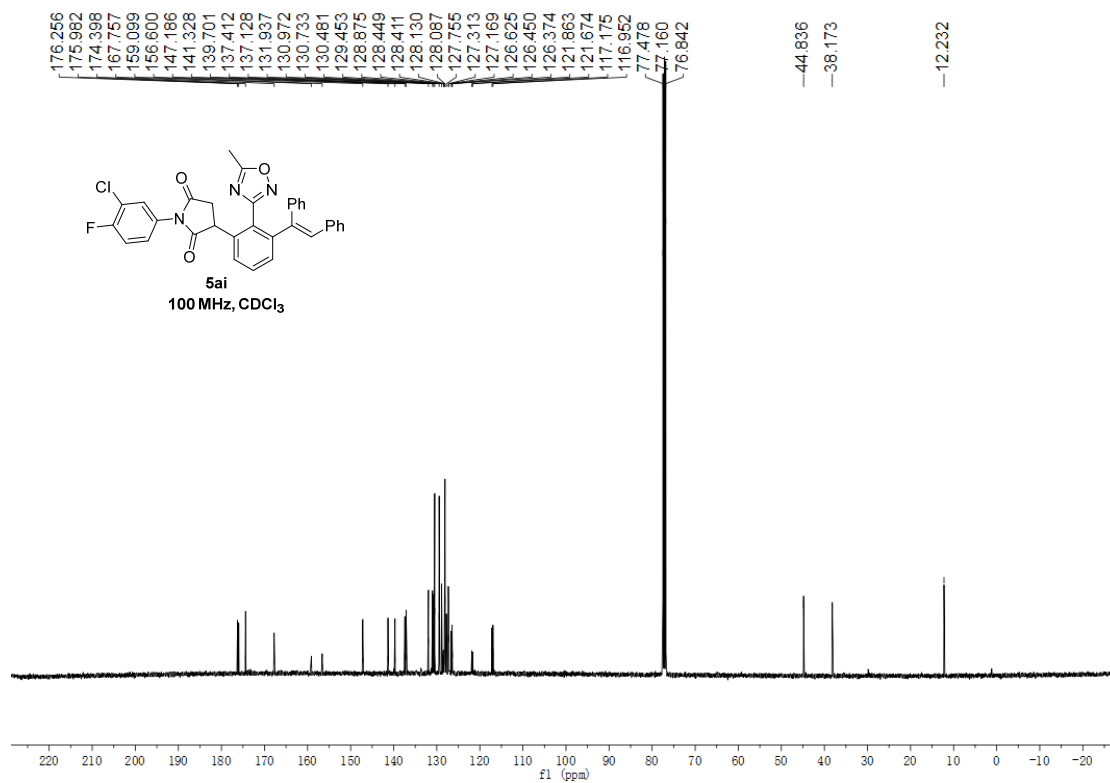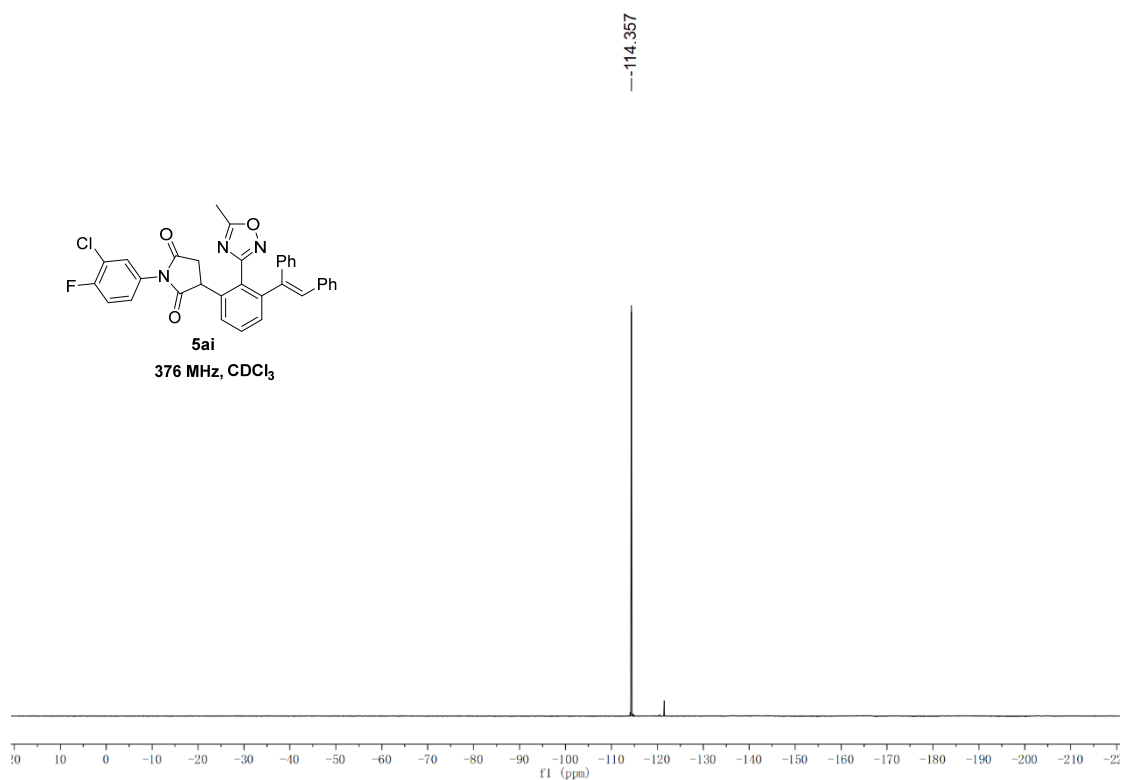

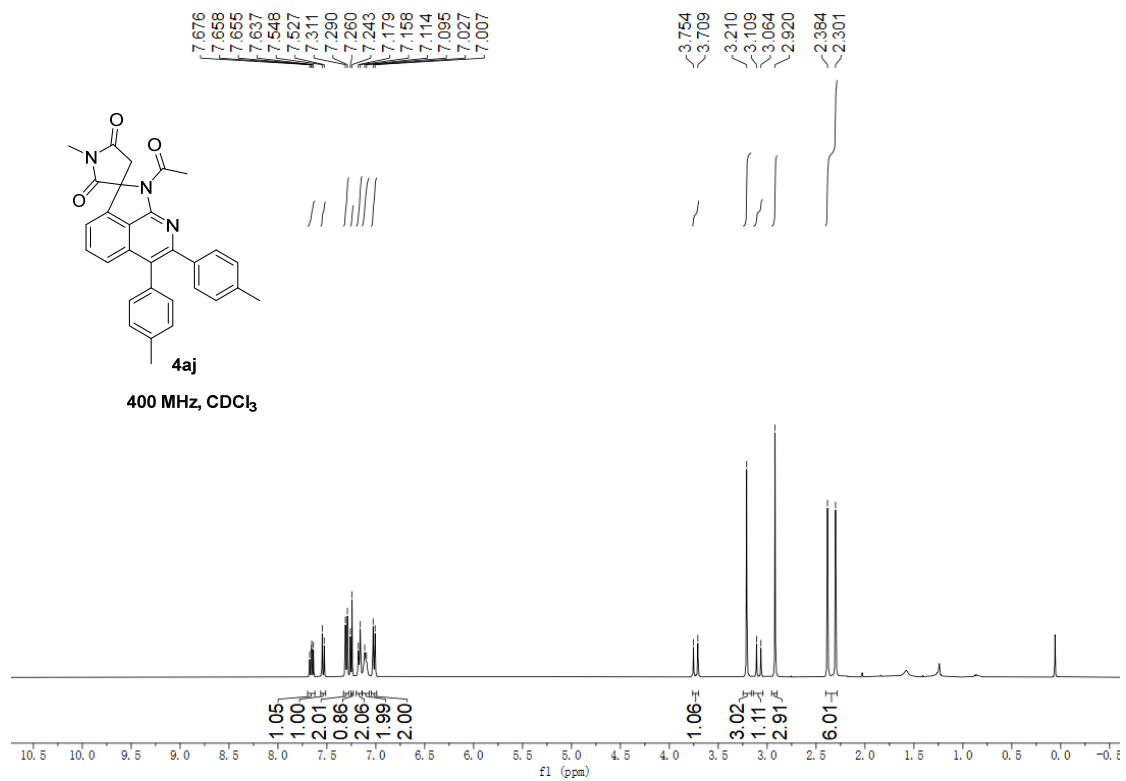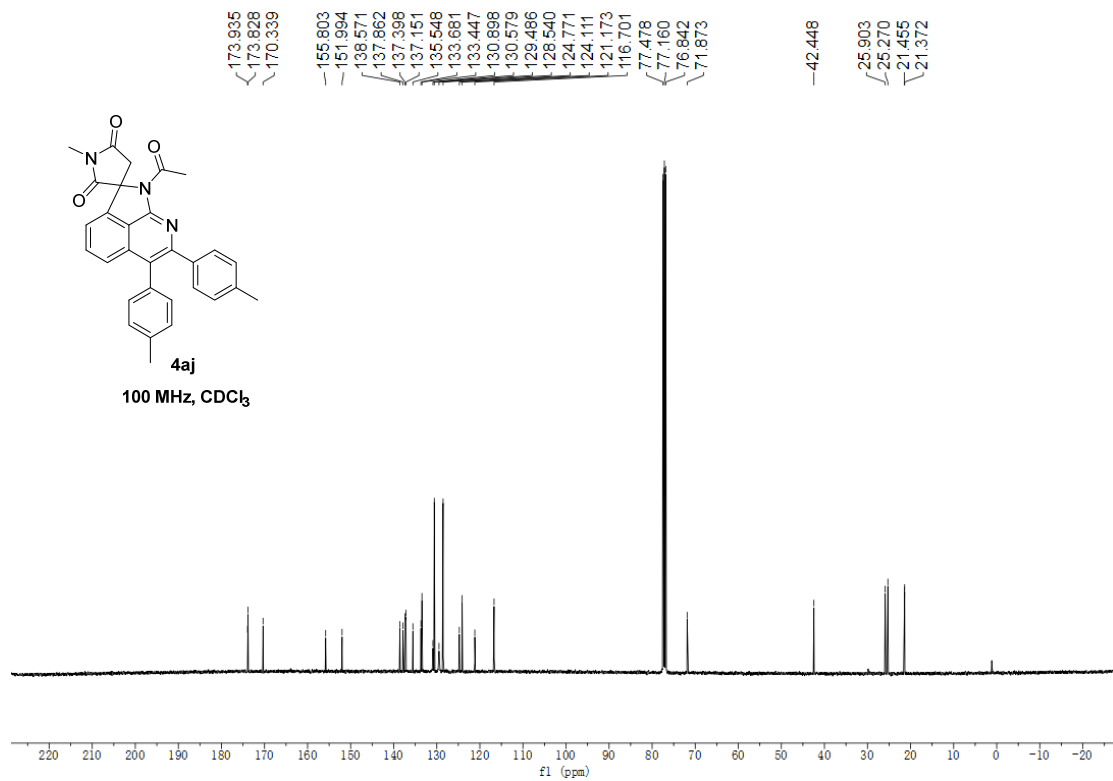

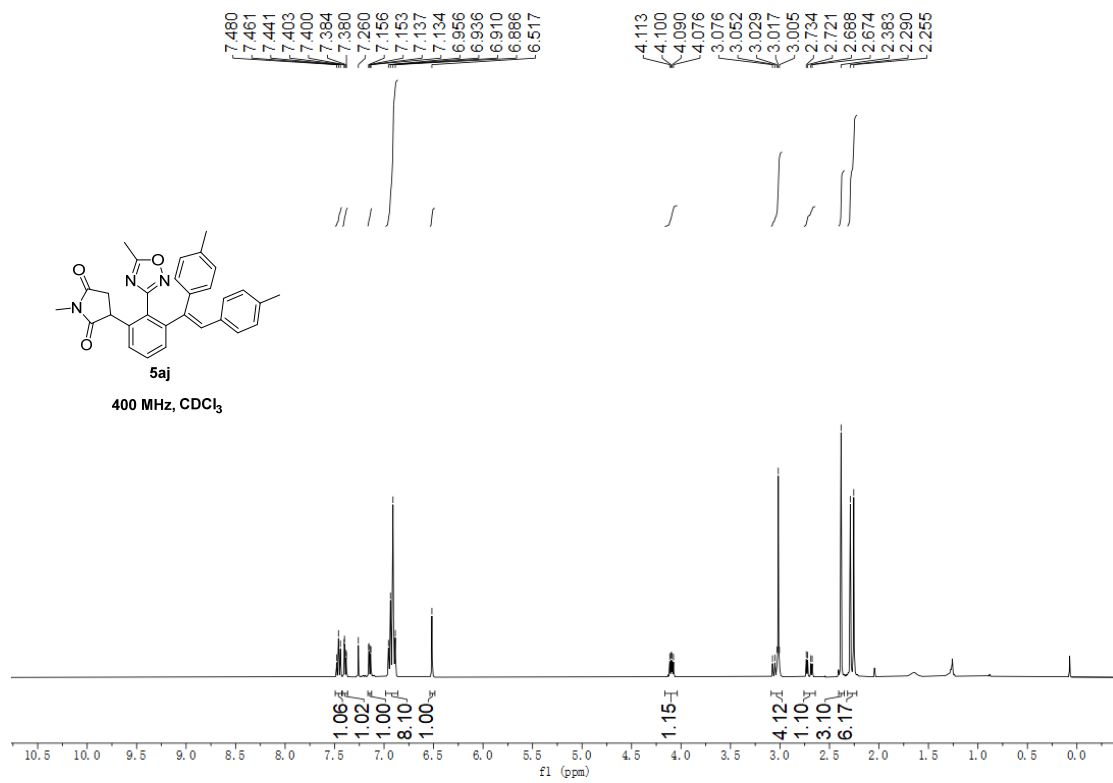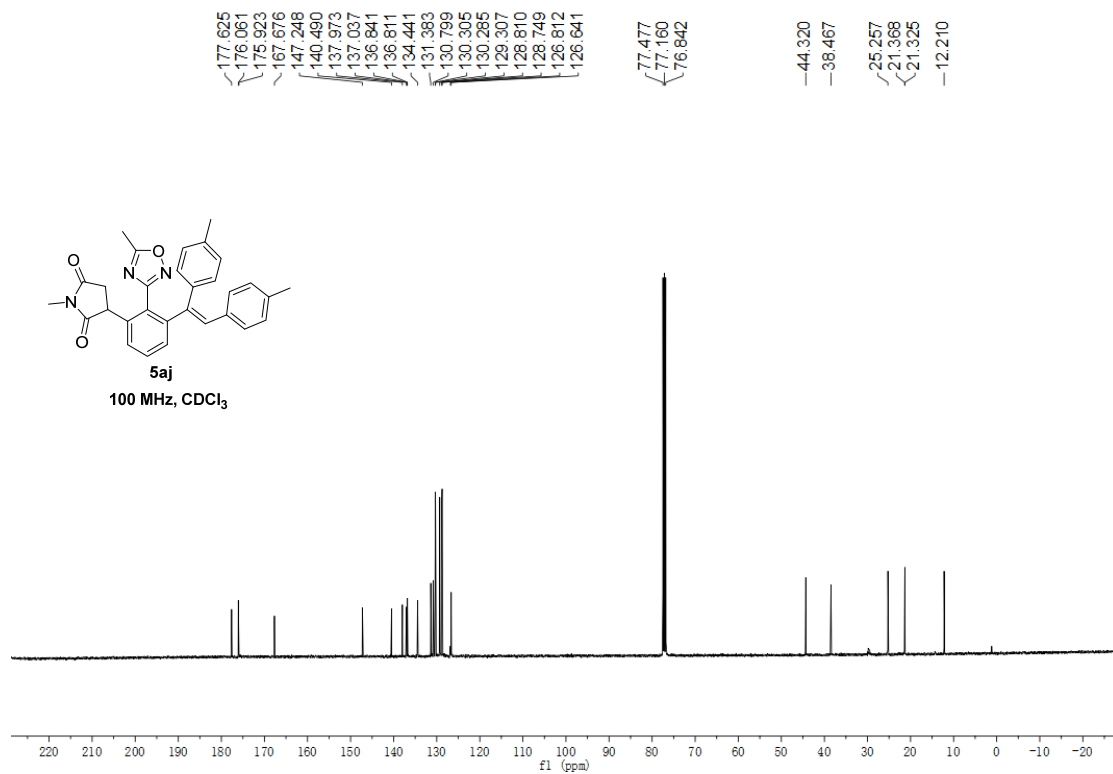

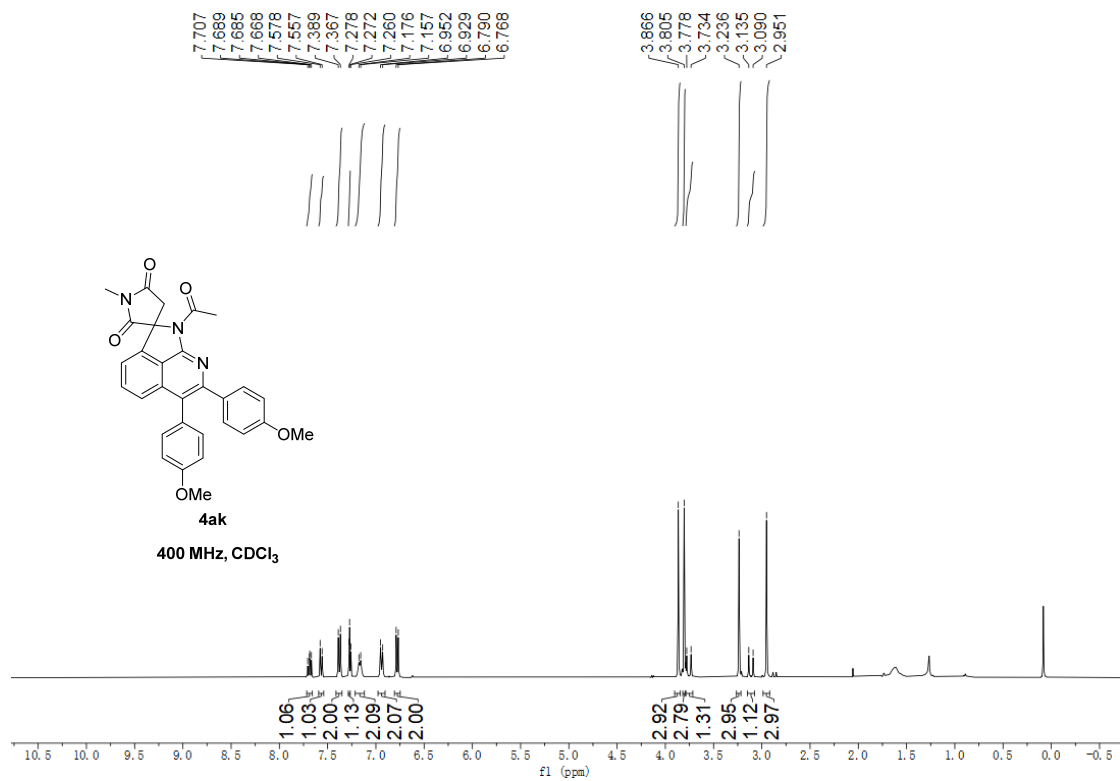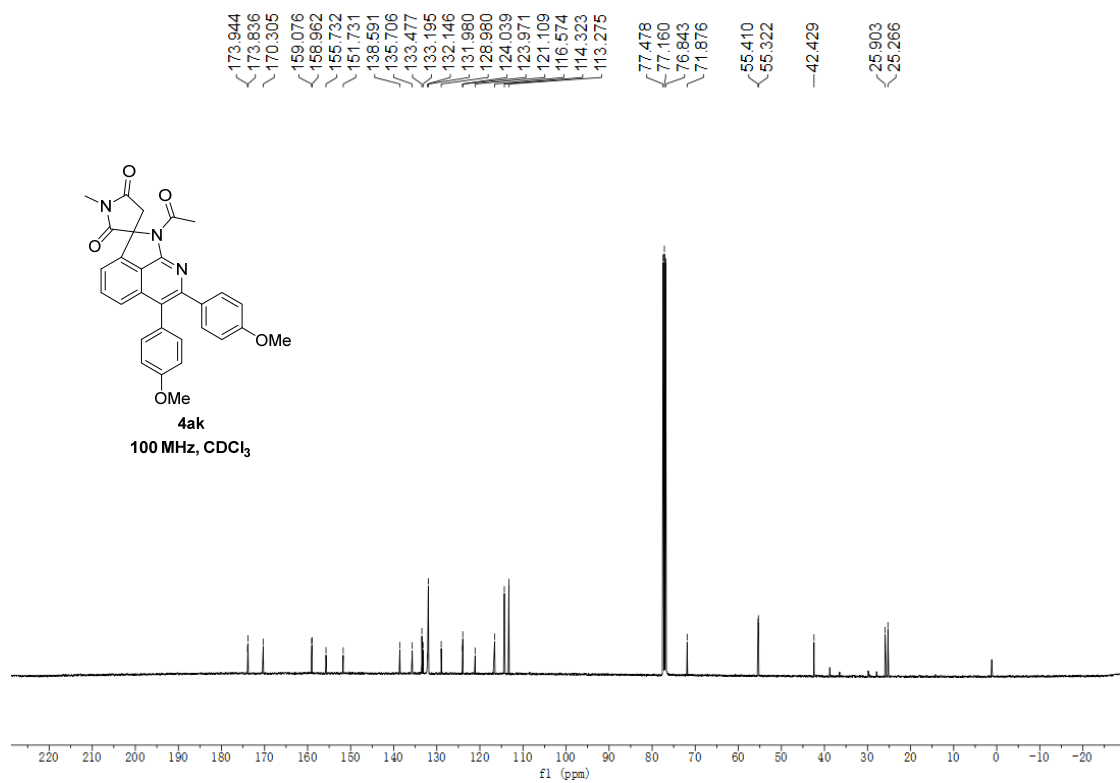

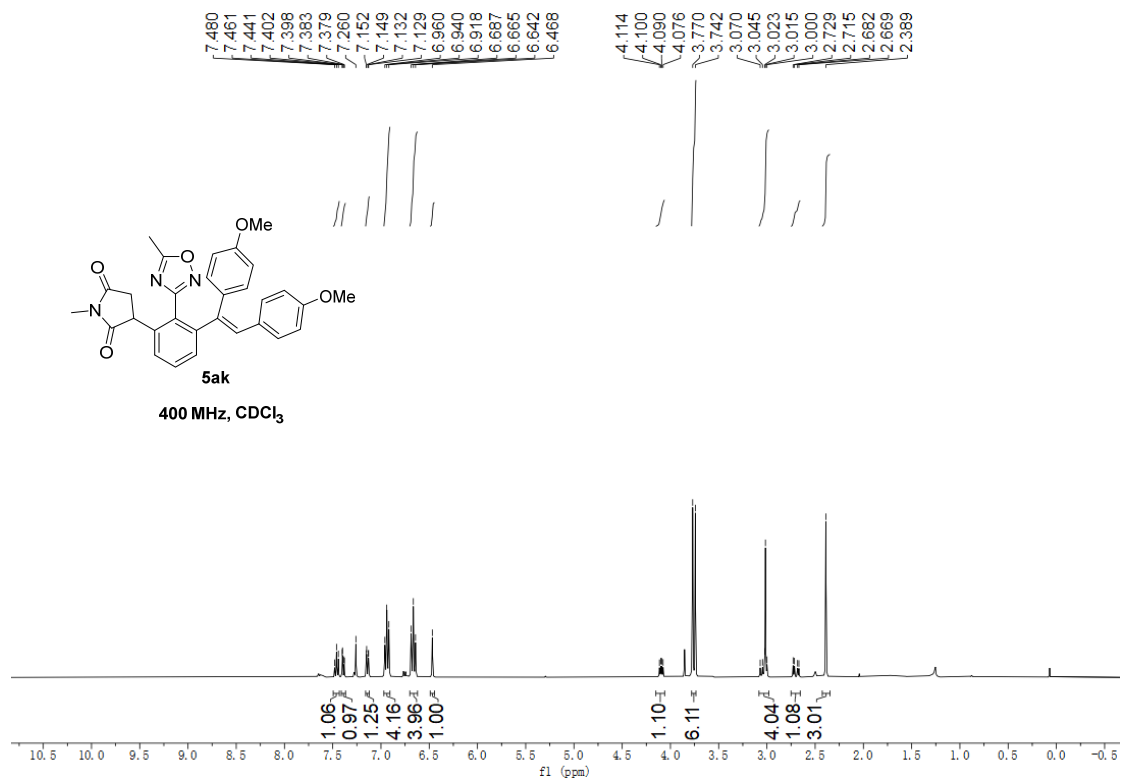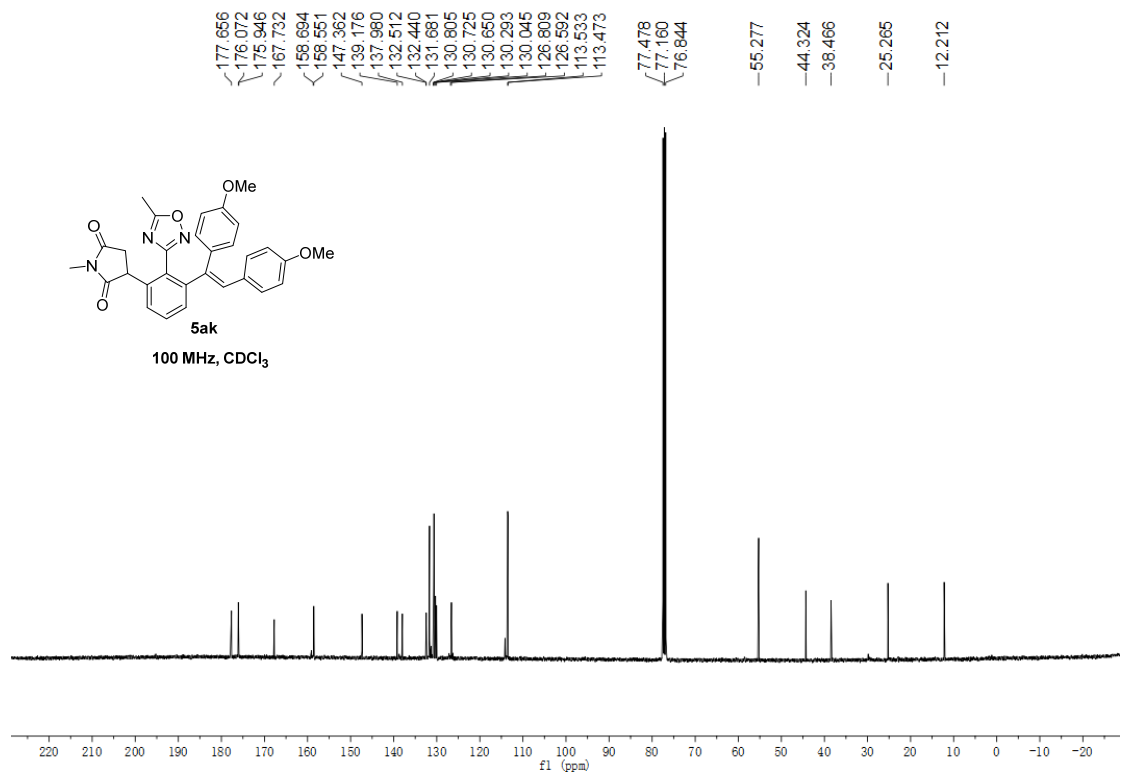



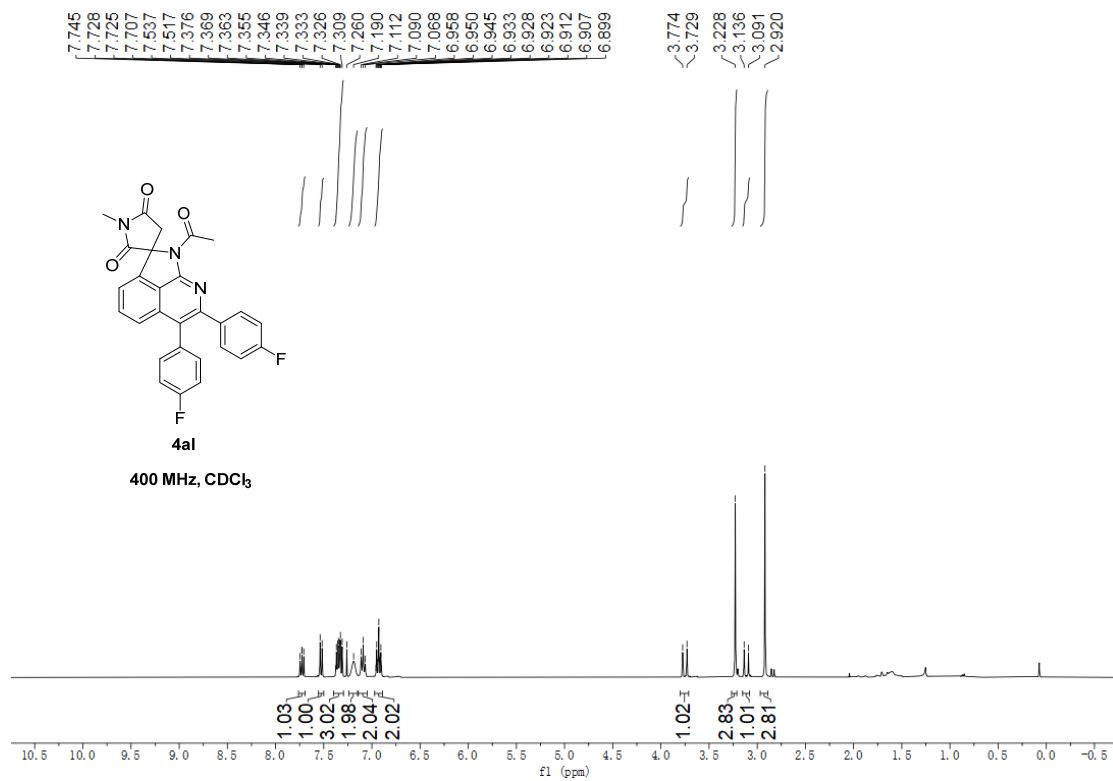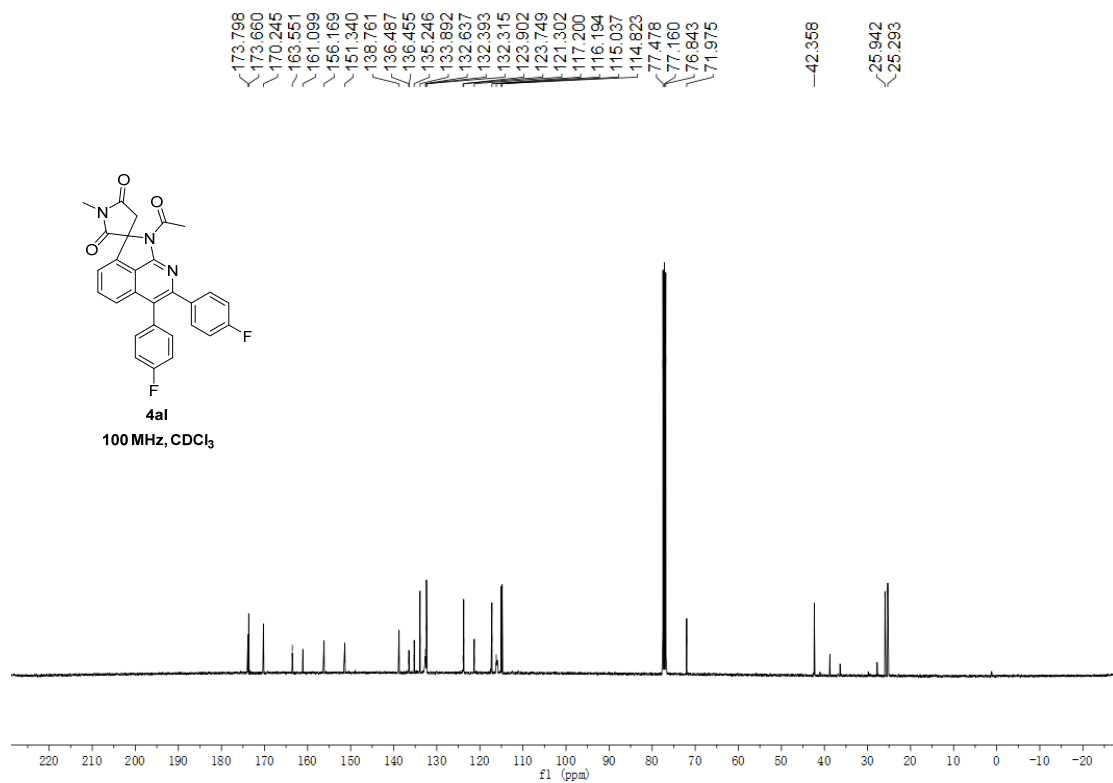

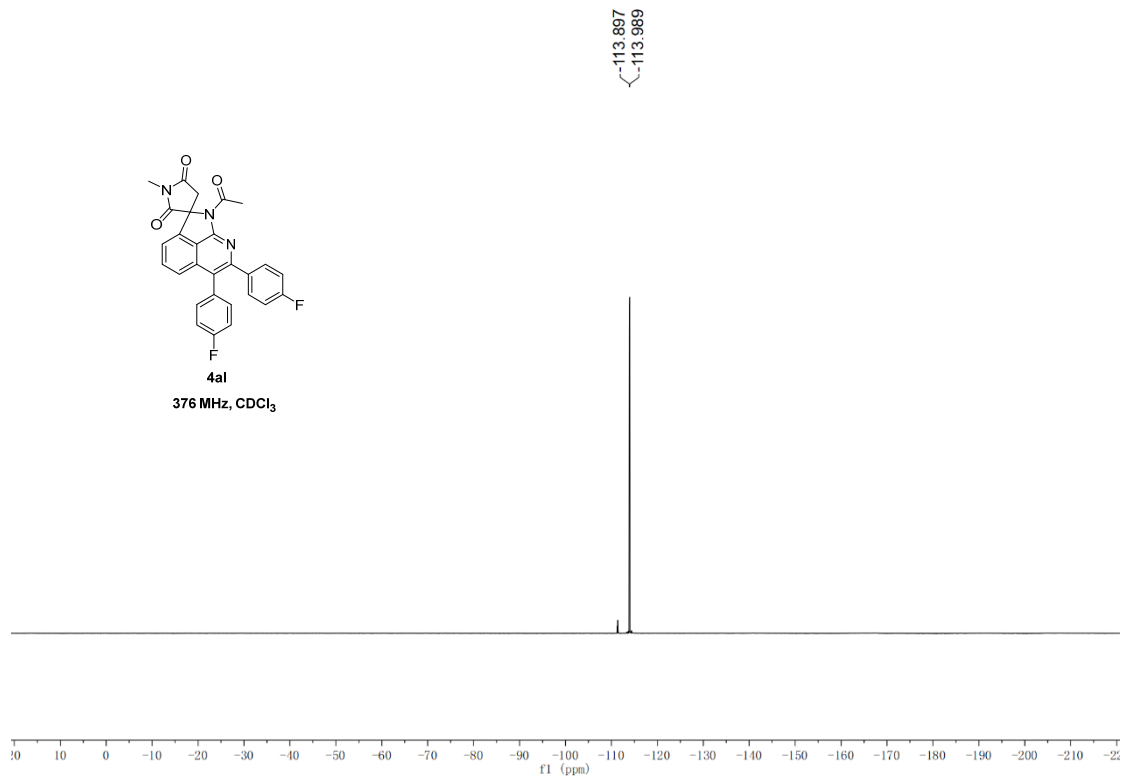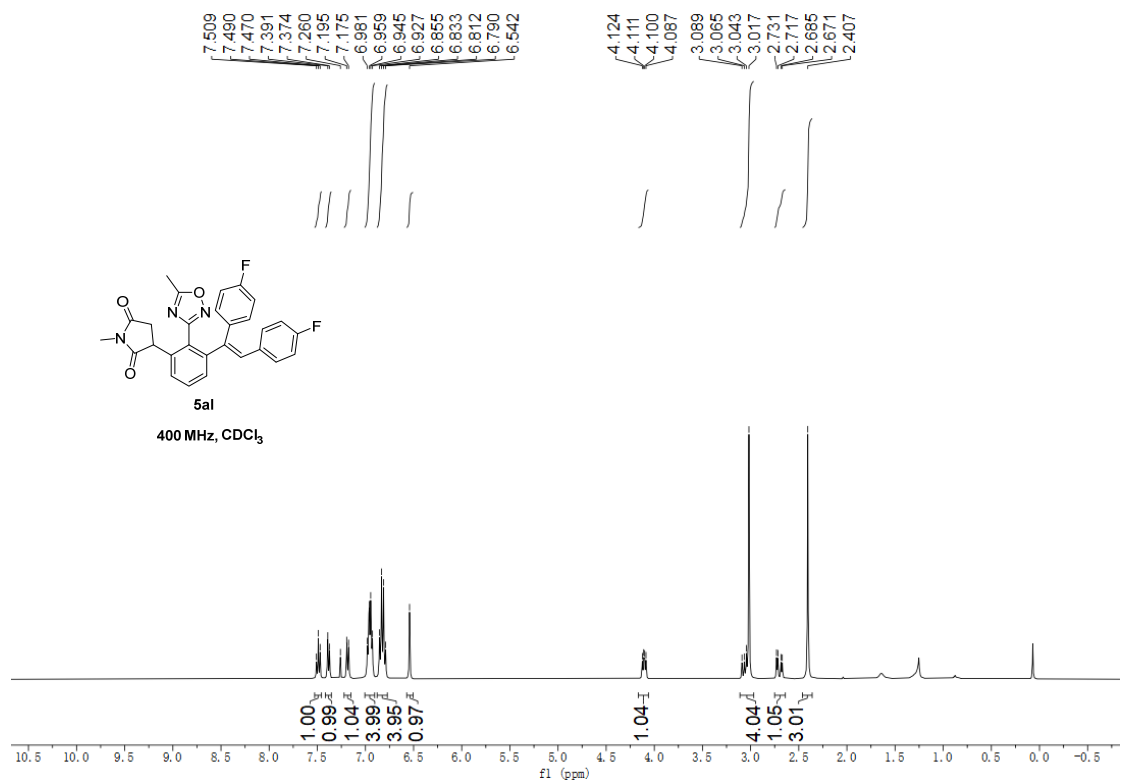

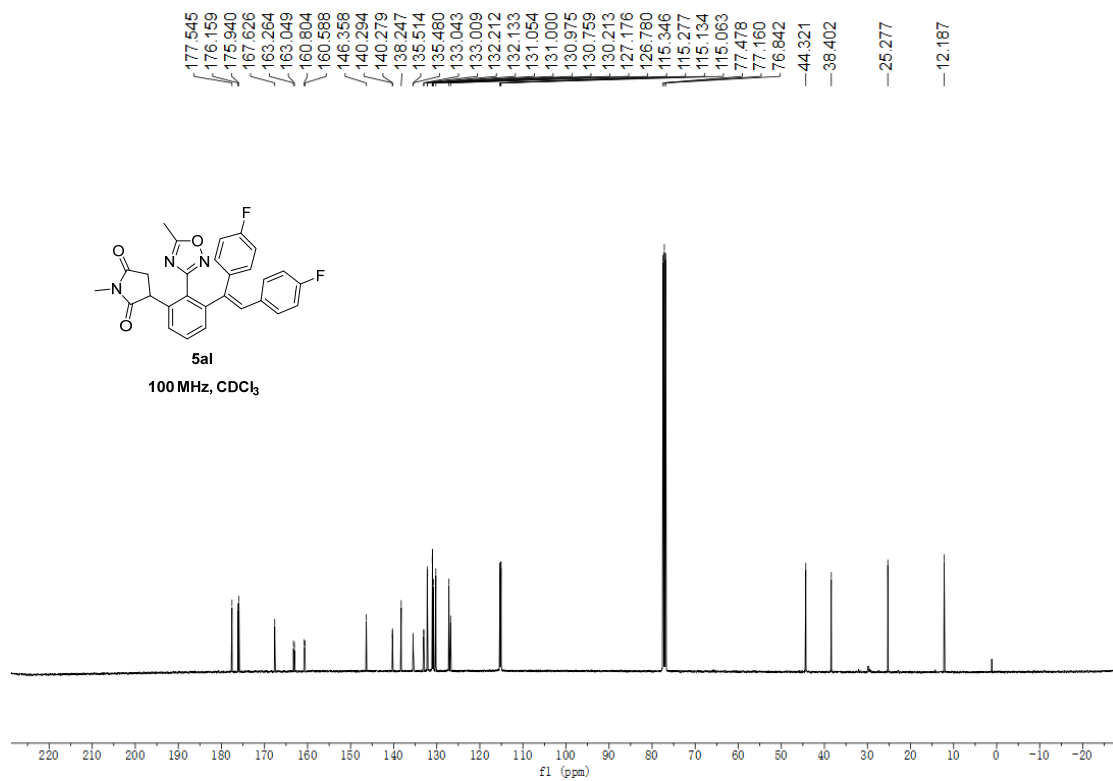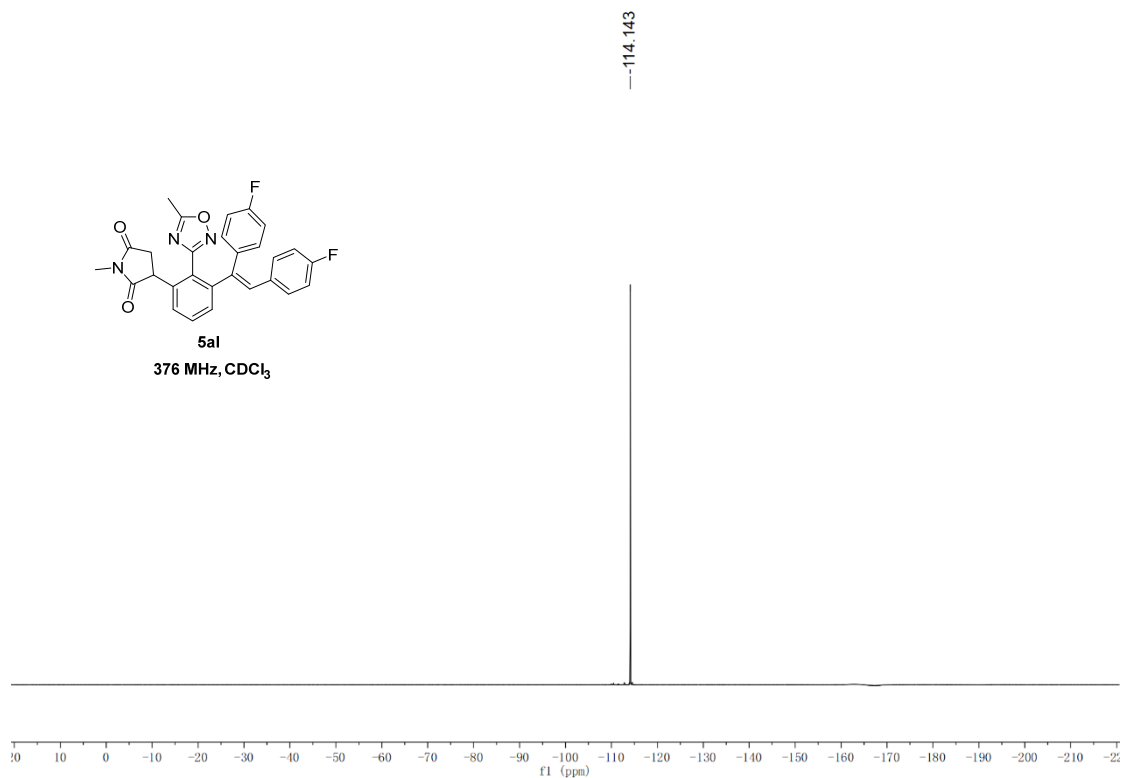

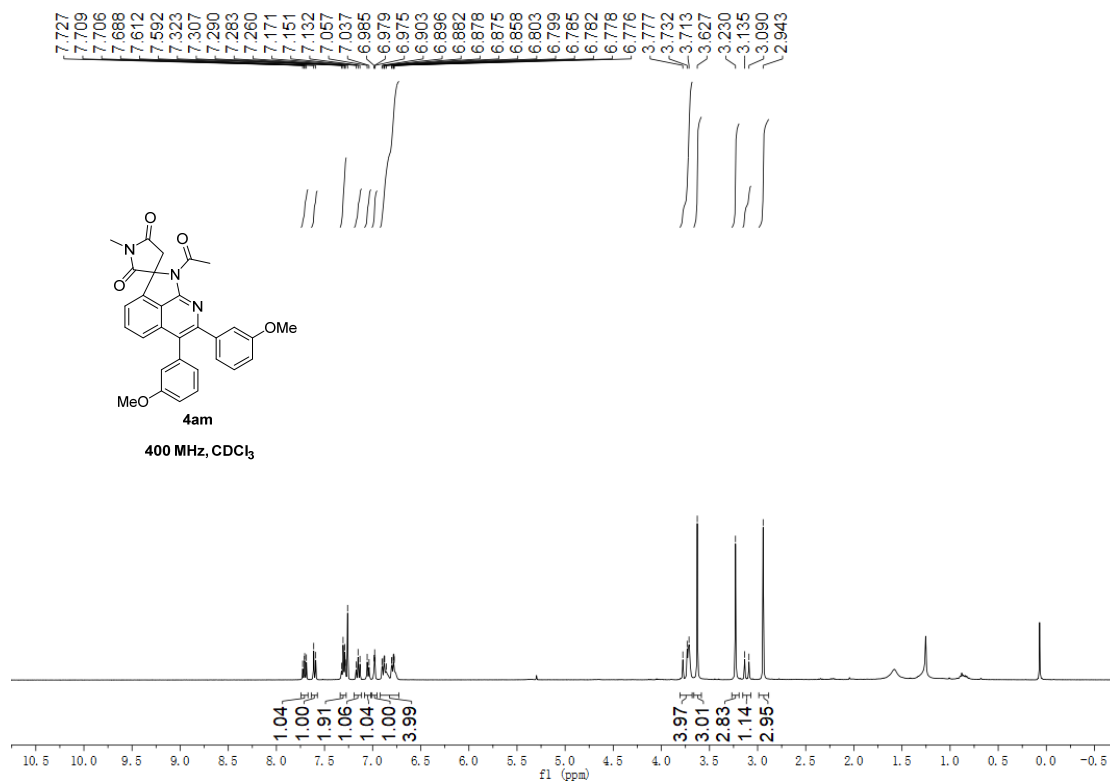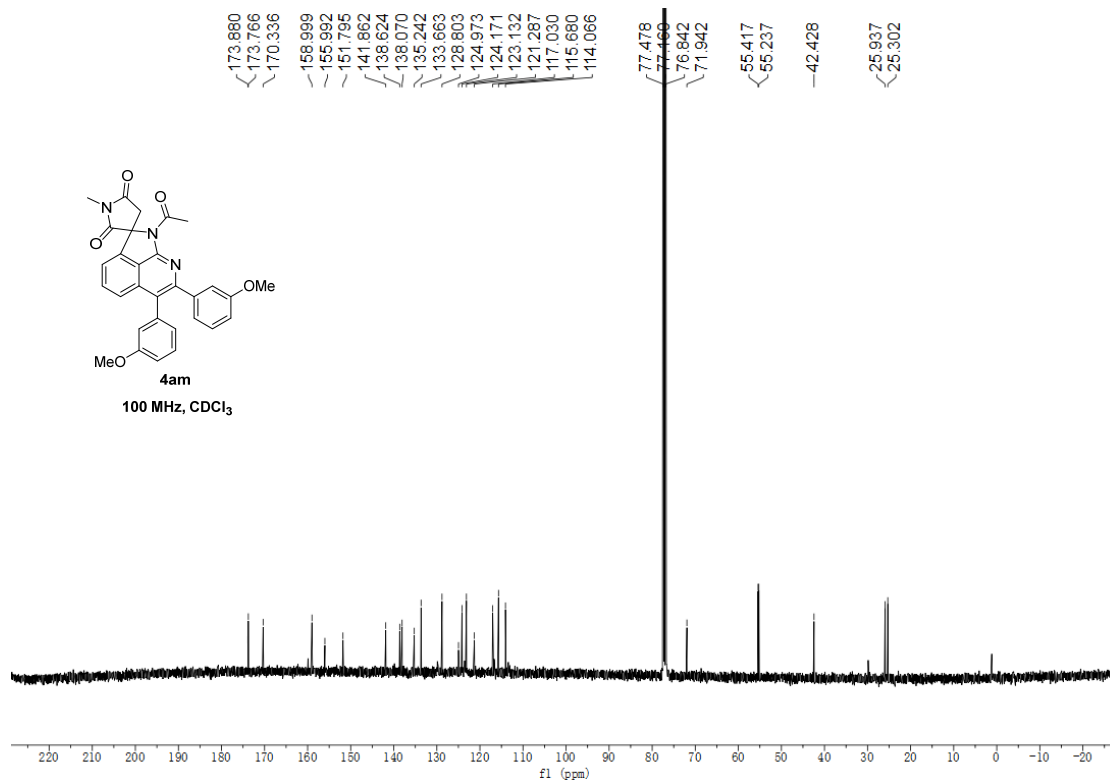

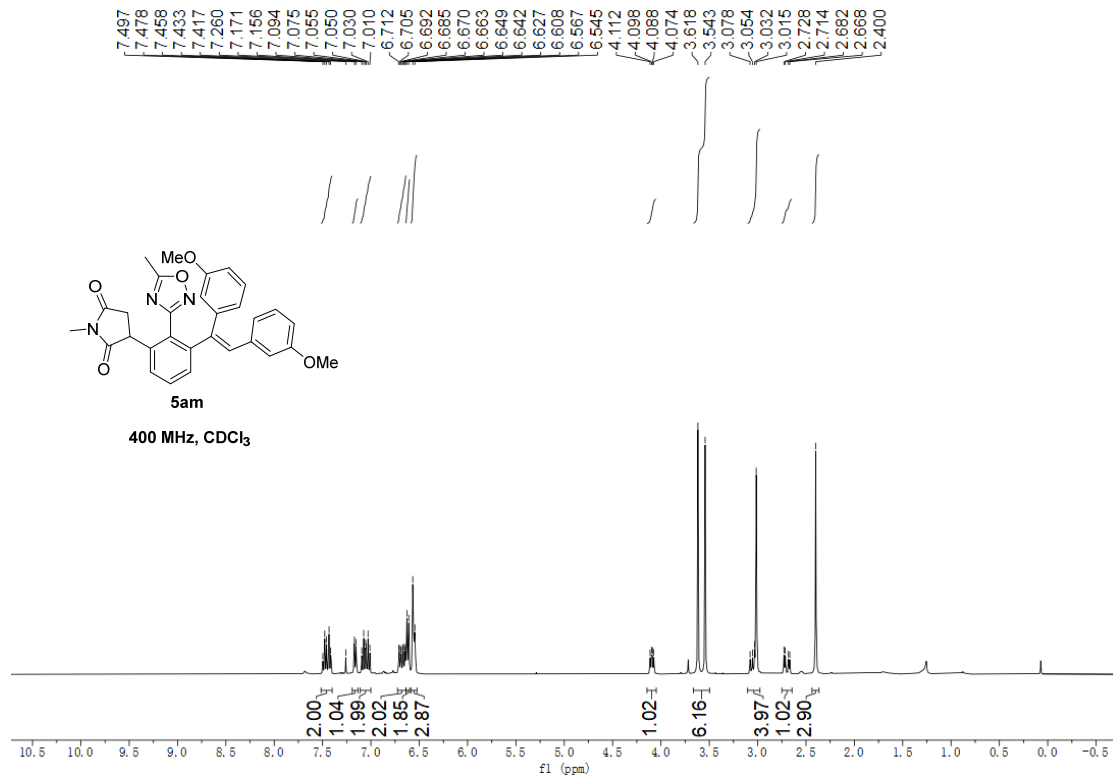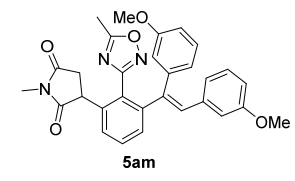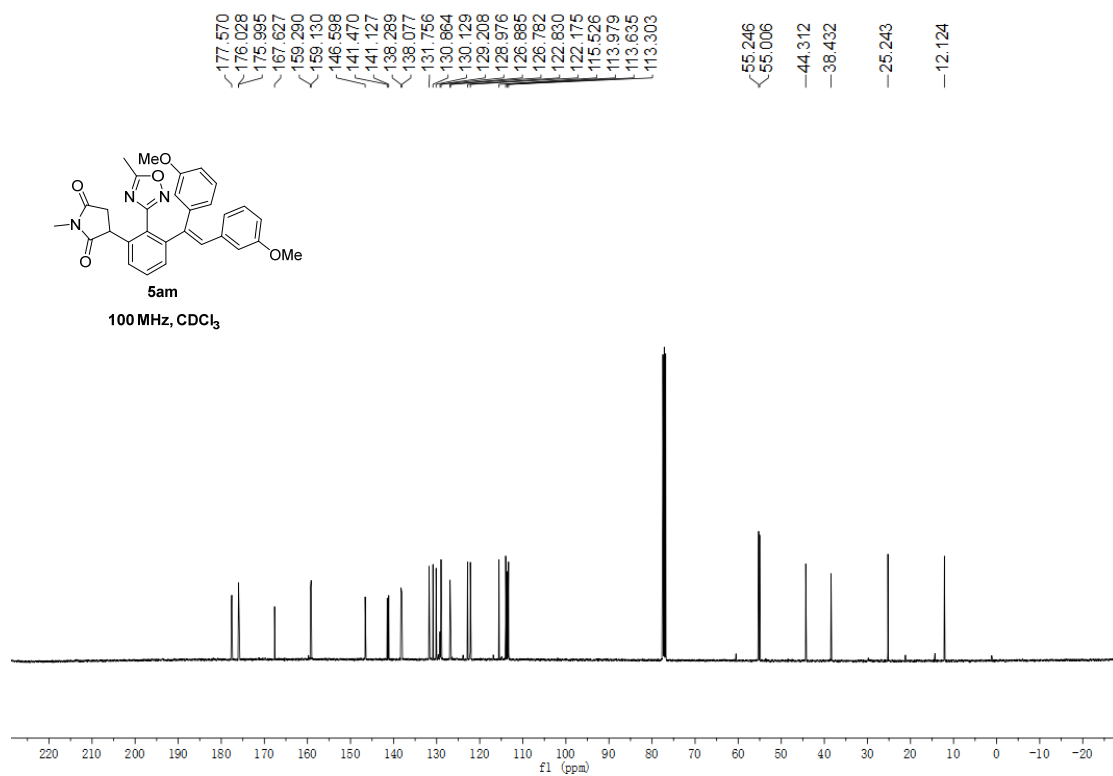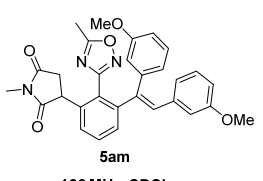

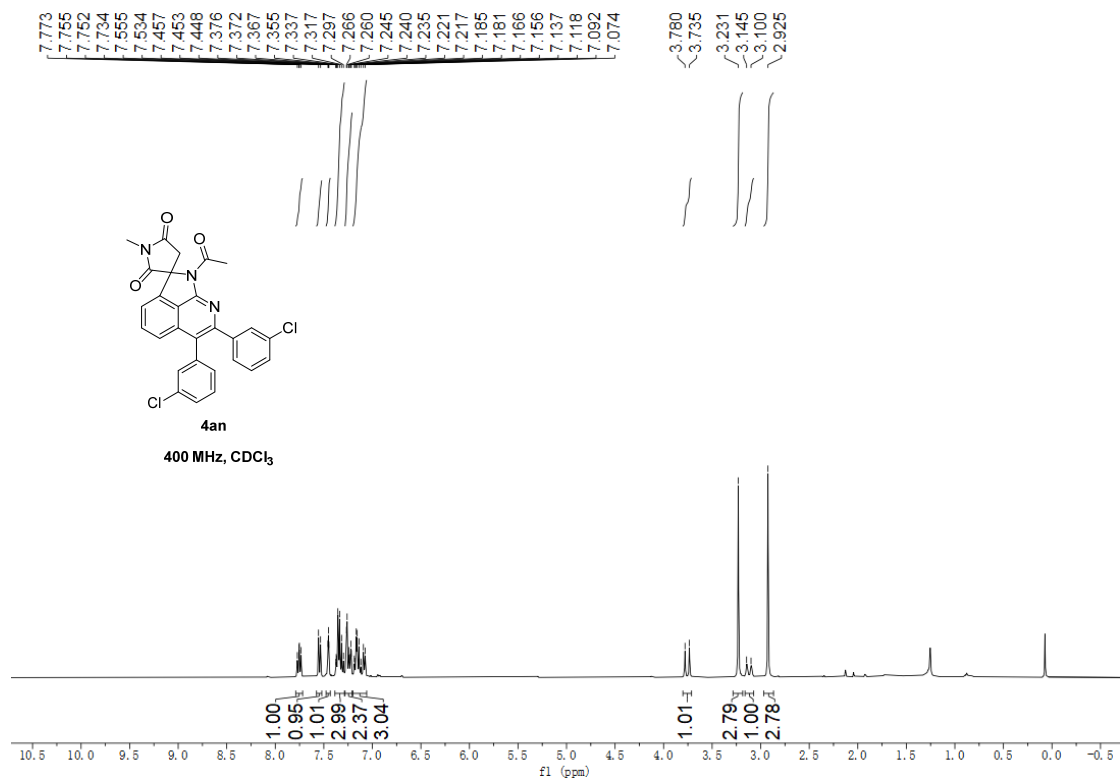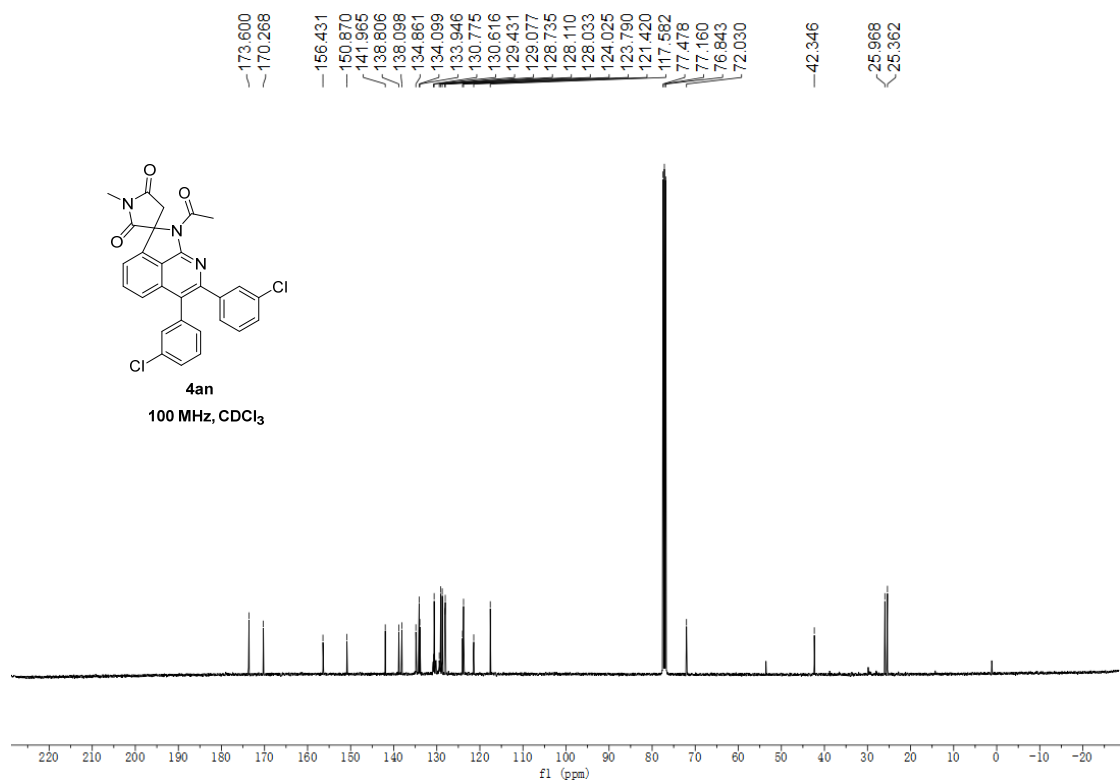

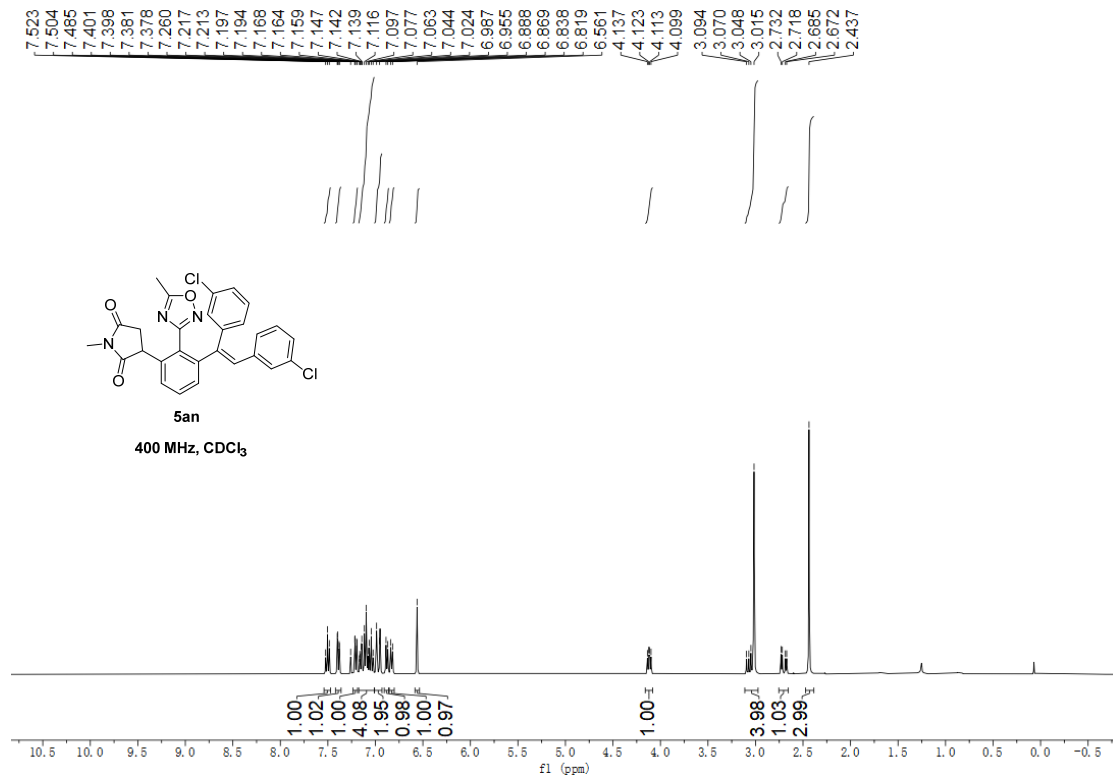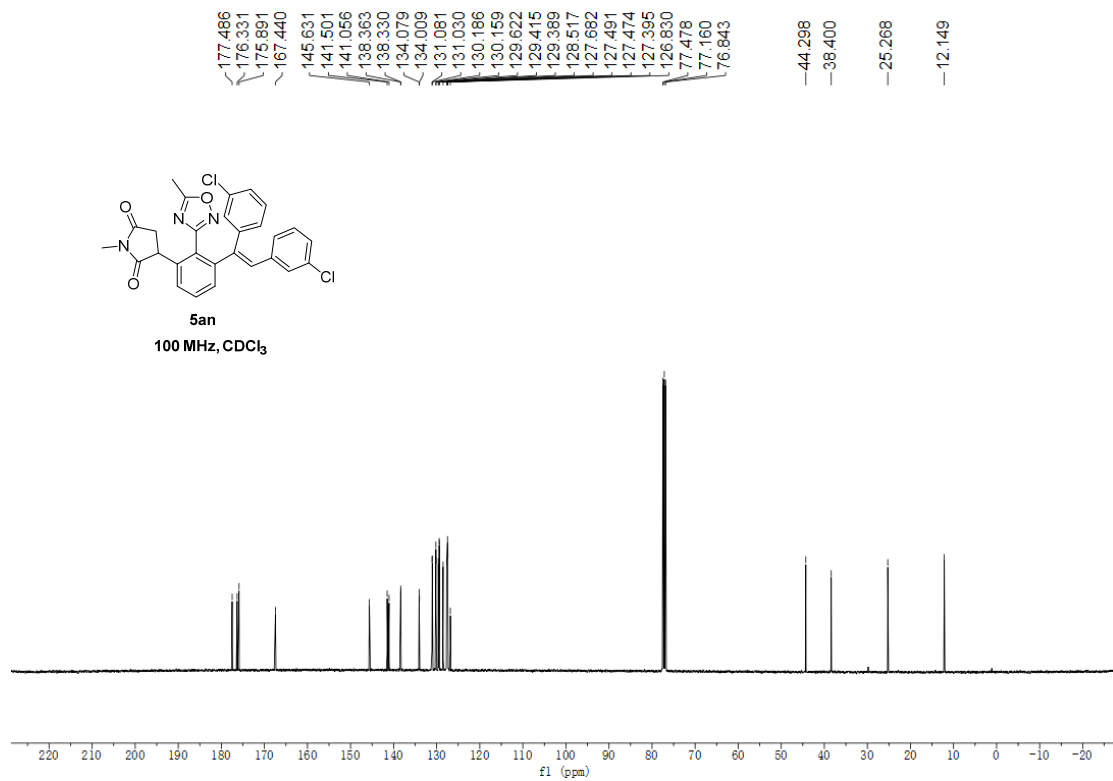

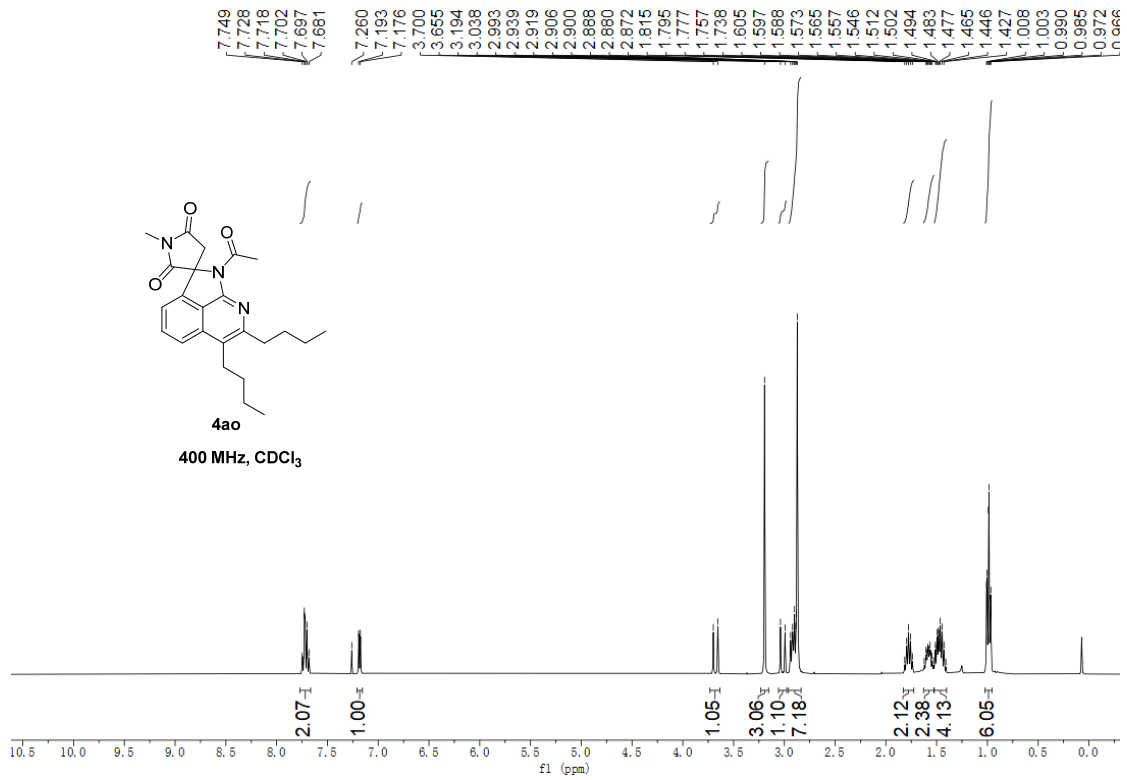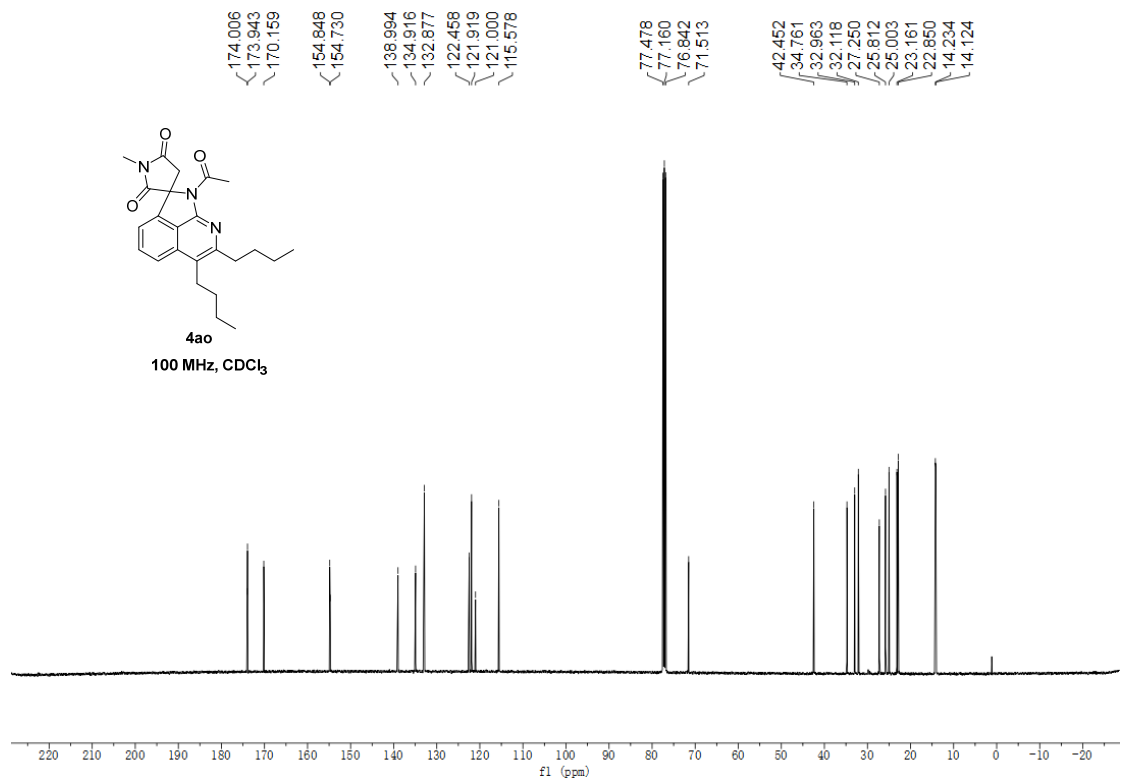



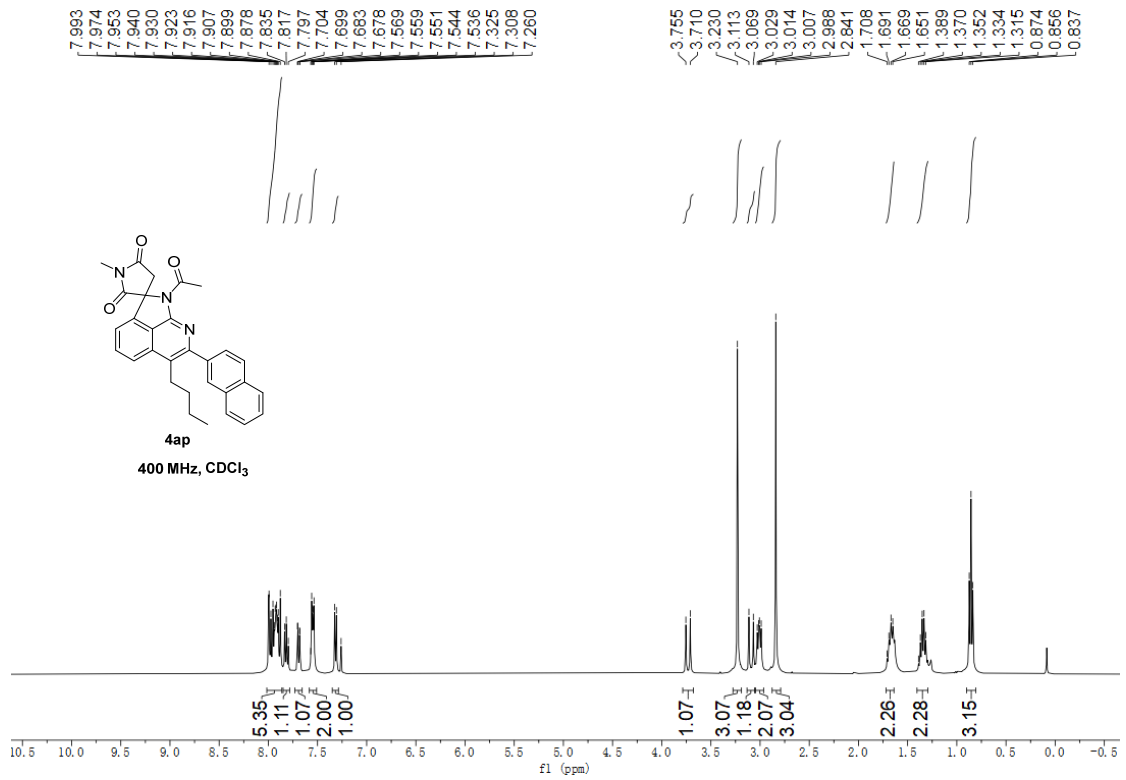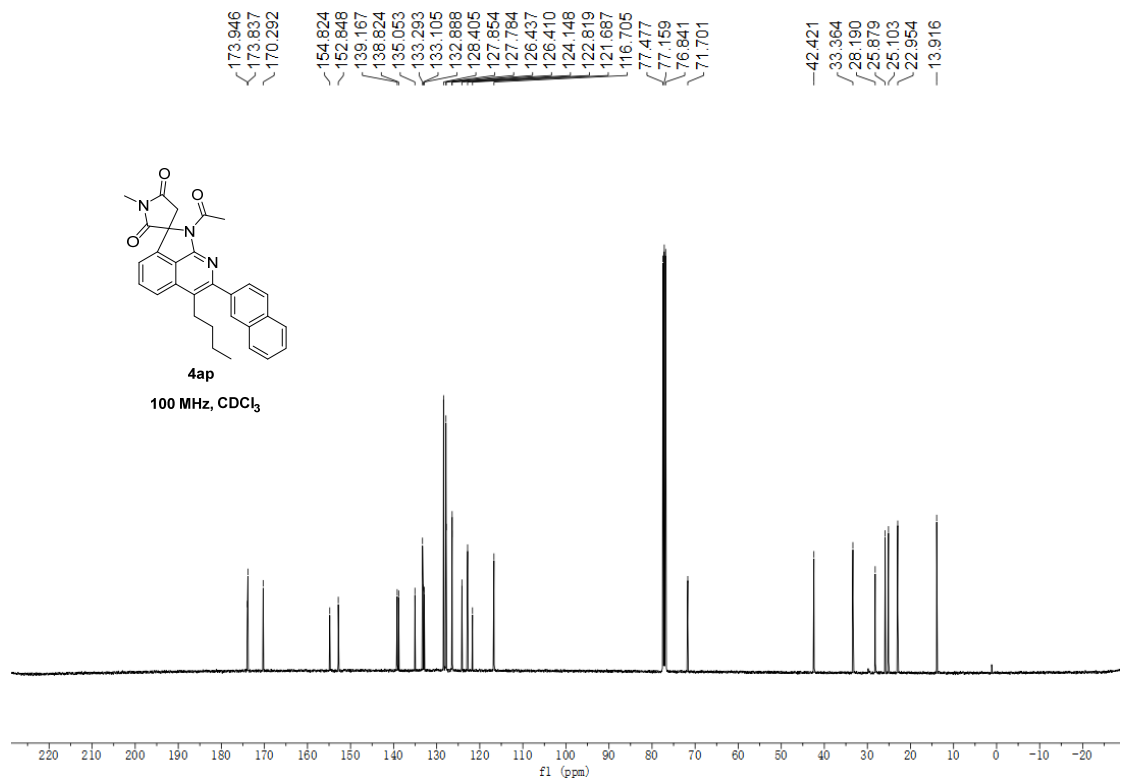

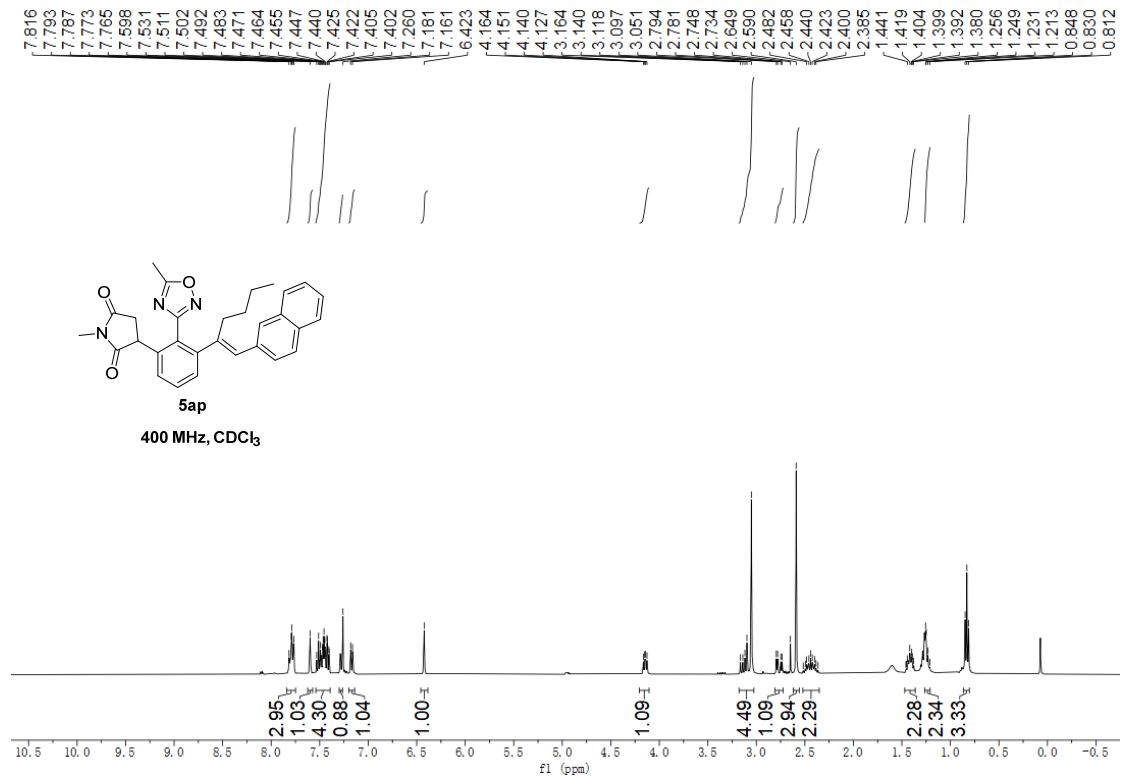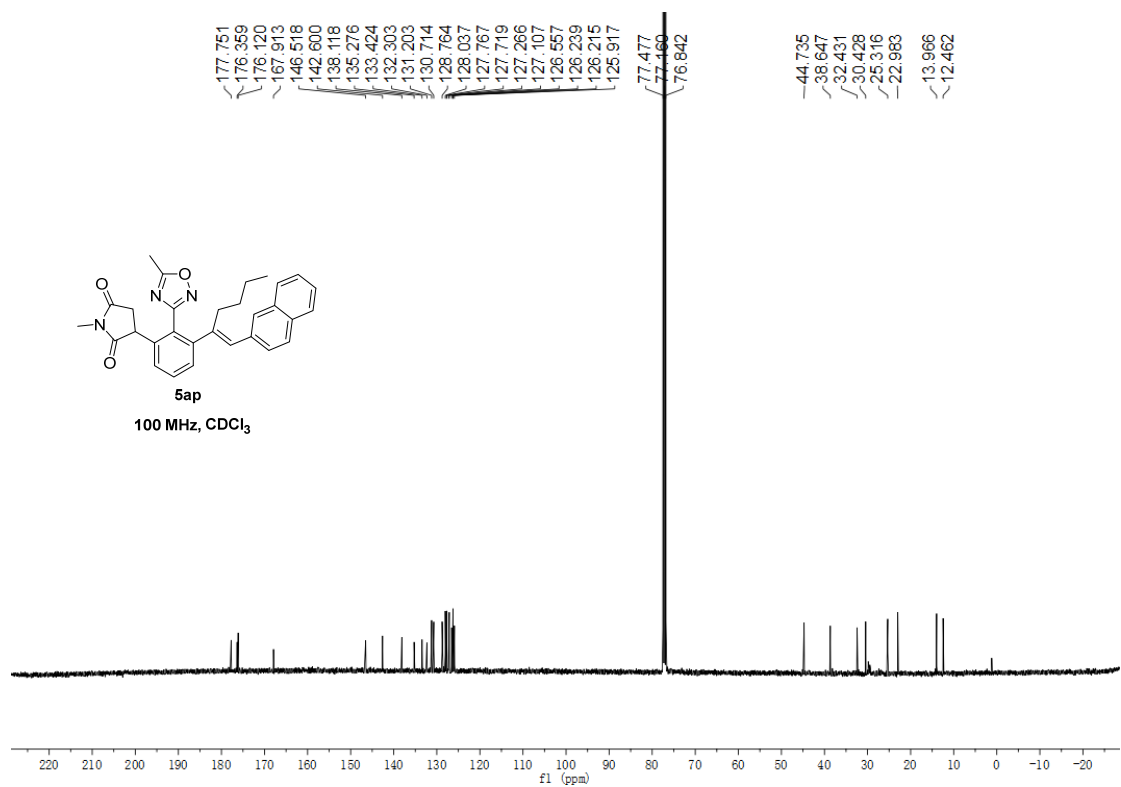

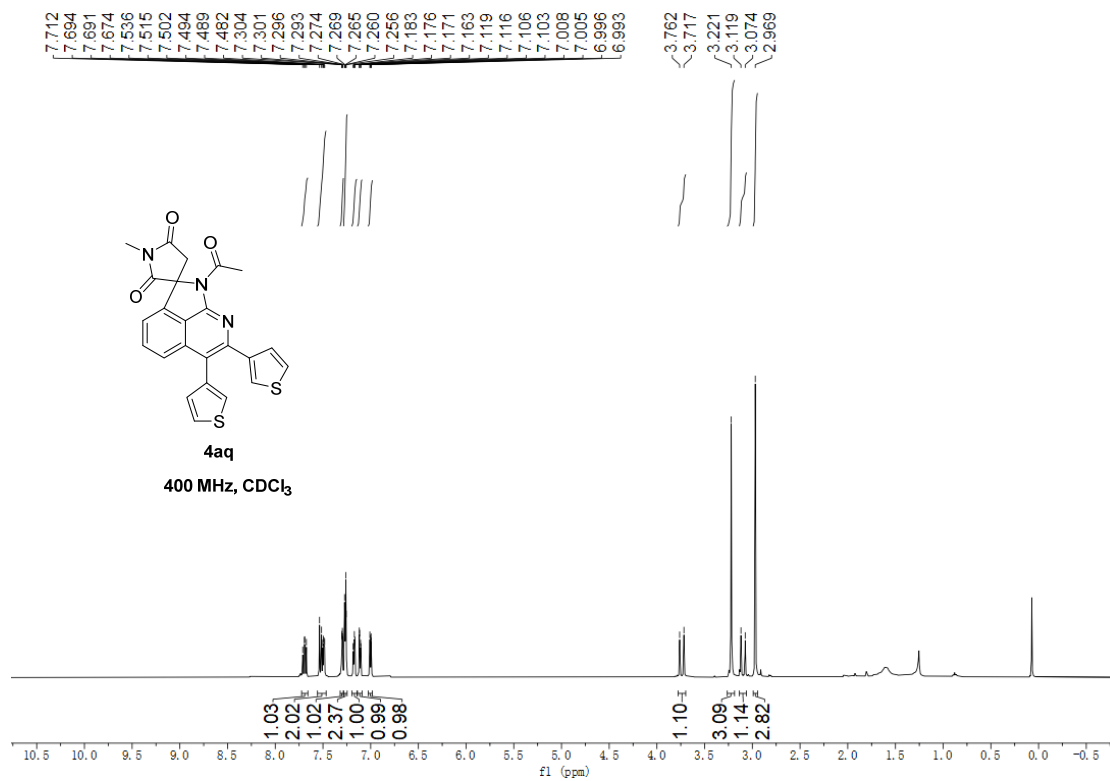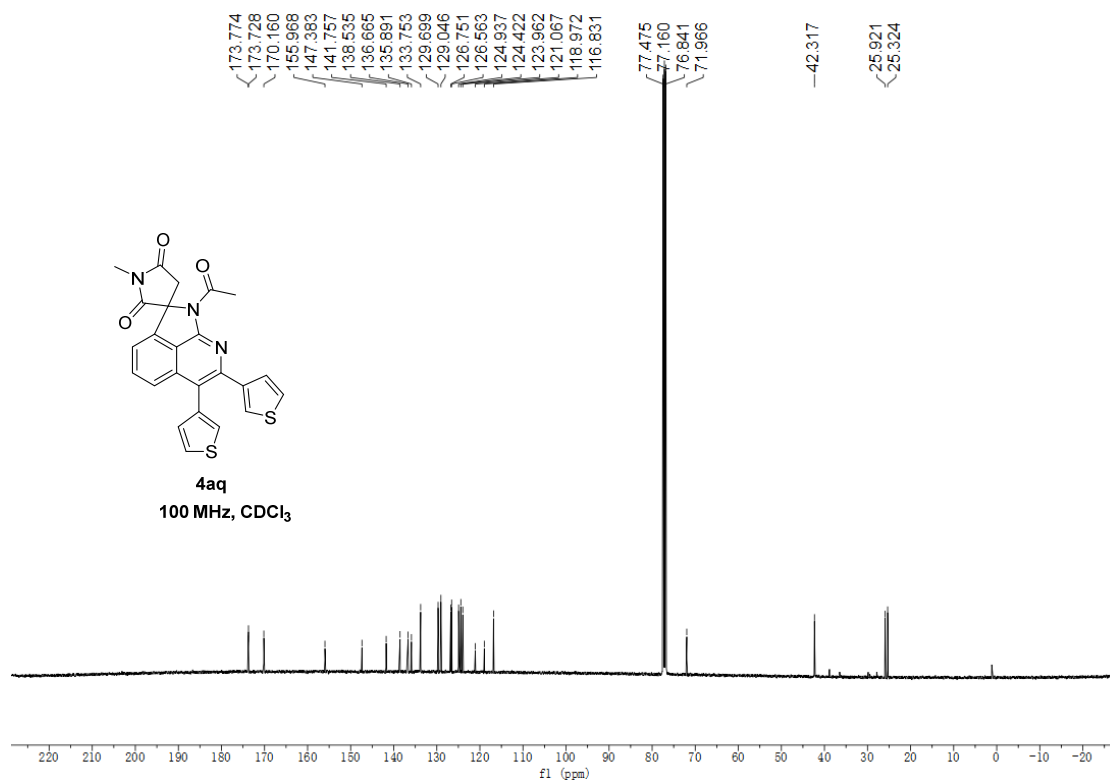

Supplement: d2ob00137c1.pdf [file d2ob00137c1.pdf]
